# Supplementary material
Source: PubMed Central journal article supplement (PMC3691958)

**Skeletal Diversification via Heteroatom Linkage Control: Preparation of Bicyclic and Spirocyclic Scaffolds from *N*-Substituted Homopropargyl Alcohols**

Thomas O. Painter,<sup>†</sup> Jonathon R. Bunn,<sup>†</sup> Frank J. Schoenen,<sup>‡</sup> Justin T. Douglas,<sup>§†</sup> Victor W. Day,<sup>§</sup> Conrad Santini<sup>†\*</sup>

<sup>†</sup>Center for Chemical Methodologies and Library Development, The University of Kansas, 2034 Becker Drive, Lawrence, Kansas 66047, United States

<sup>‡</sup>Specialized Chemistry Center, The University of Kansas, 2034 Becker Drive, Lawrence, Kansas 66047, United States

<sup>§</sup>The University of Kansas Molecular Structures Group, 1251 Wescoe Hall Drive, Lawrence, Kansas, 66045 United States

## Supporting Information

### Table of Contents

|                                                             | <b>Page</b>   |
|-------------------------------------------------------------|---------------|
| <b>Structure of 10{10,1} by X-ray crystallography</b>       | S2            |
| <b>Library yield trend charts for individual components</b> | S2            |
| <b>Precursor and Scaffold NMR Spectra</b>                   | S5            |
| <b>Final Library Compound NMR Spectra</b>                   | S24           |
| <b>Crystal Structure (CIF)</b>                              | Separate File |

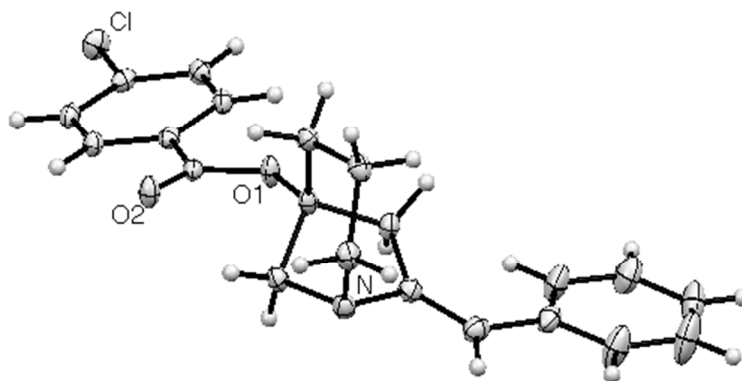

**Figure S1.** Structure of 10{10,1} as determined by X-ray crystallography

Overall pass rate and yield trend data shown below.

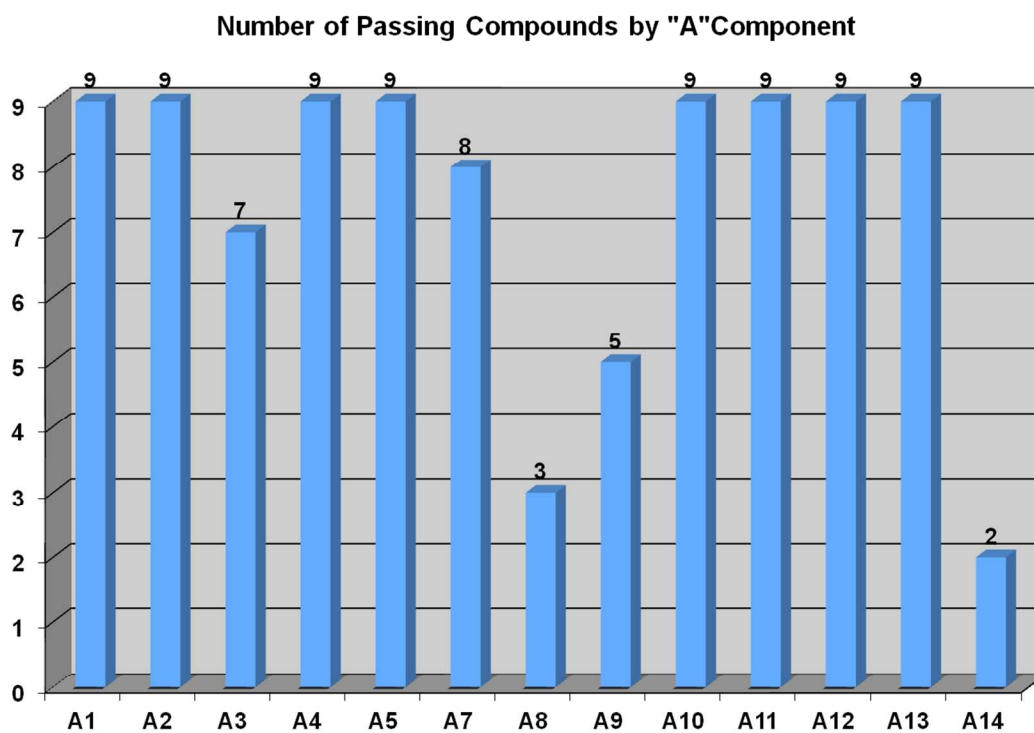

**Chart S1.** Number of passing compounds by "A" component

Overall "A" Component Yield(%) Trends

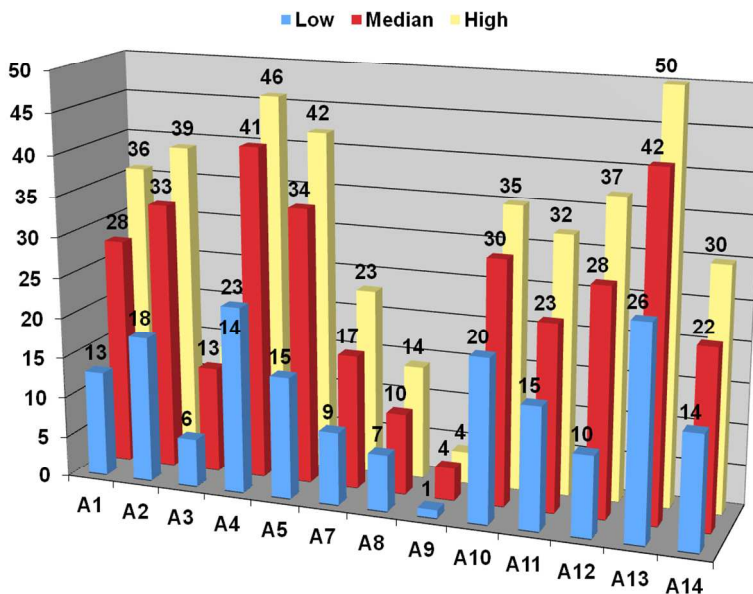

Overall "B" Component Yield(%) Trends

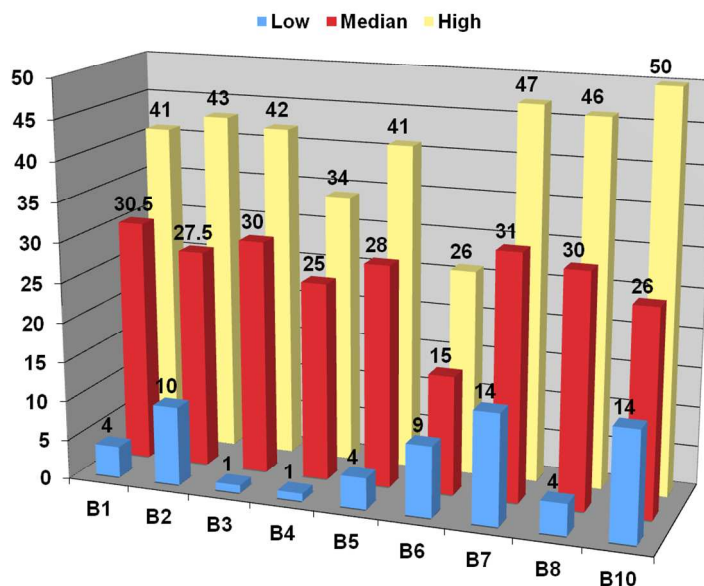

**Charts S2 and S3.** Yield trends of library compounds by components “A” or “B”. The blue bar is the lowest yield obtained. The yellow bar is the highest yield obtained. The red bar is the median yield for each component across the range of library compounds into which they were incorporated. Based on the data, we can infer that the “A” component was more important in

determining the yield outcome of each reaction than the “B” component due to the greater degree in yield variation. “B6” yields are lower presumably due to an extra purification step (prep TLC).

## Precursor and Scaffold NMR Spectra

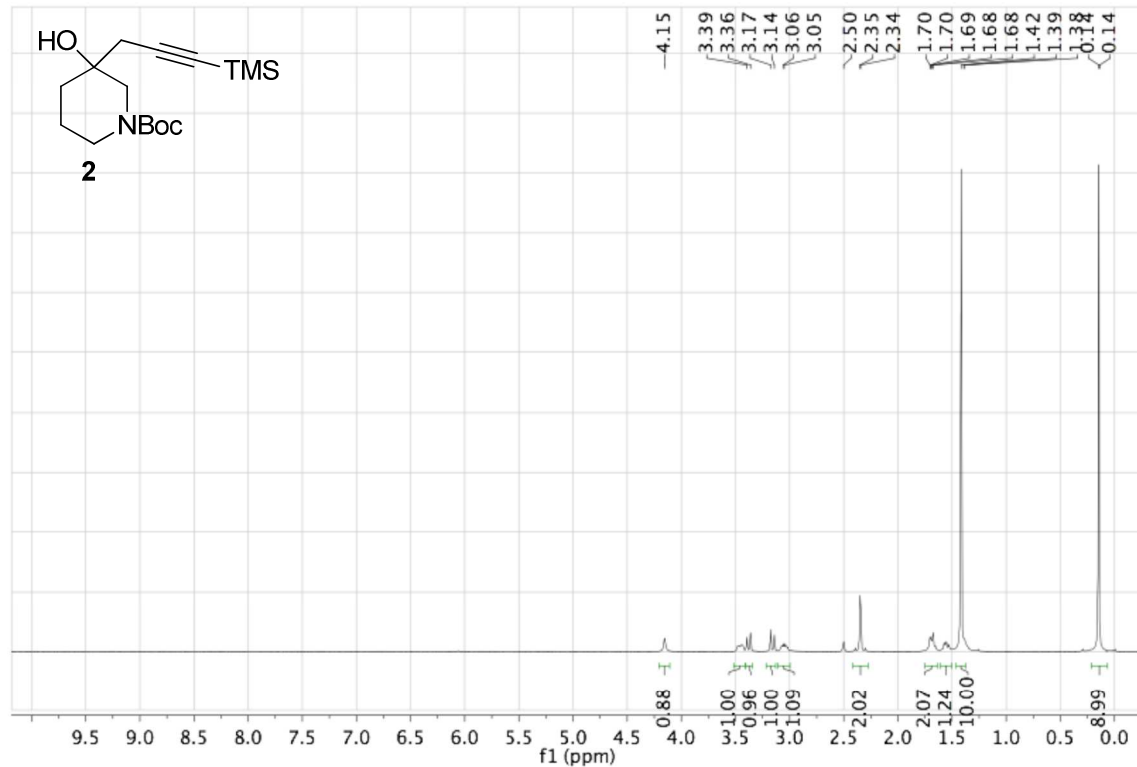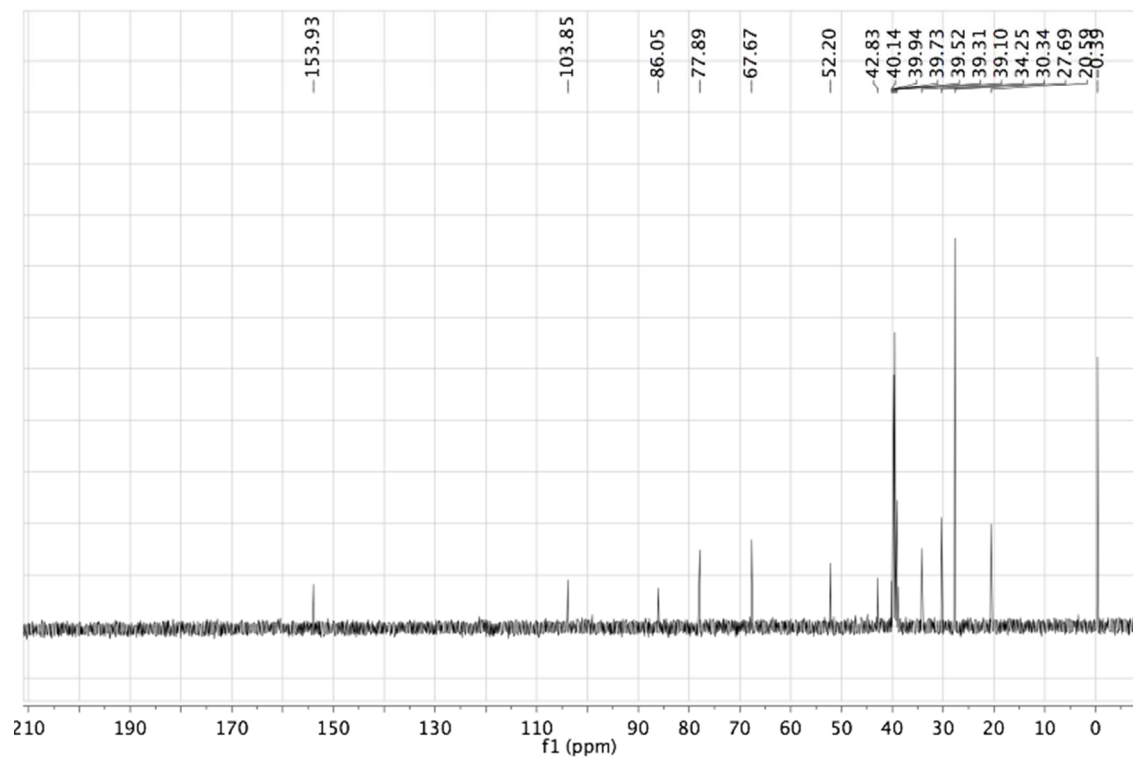

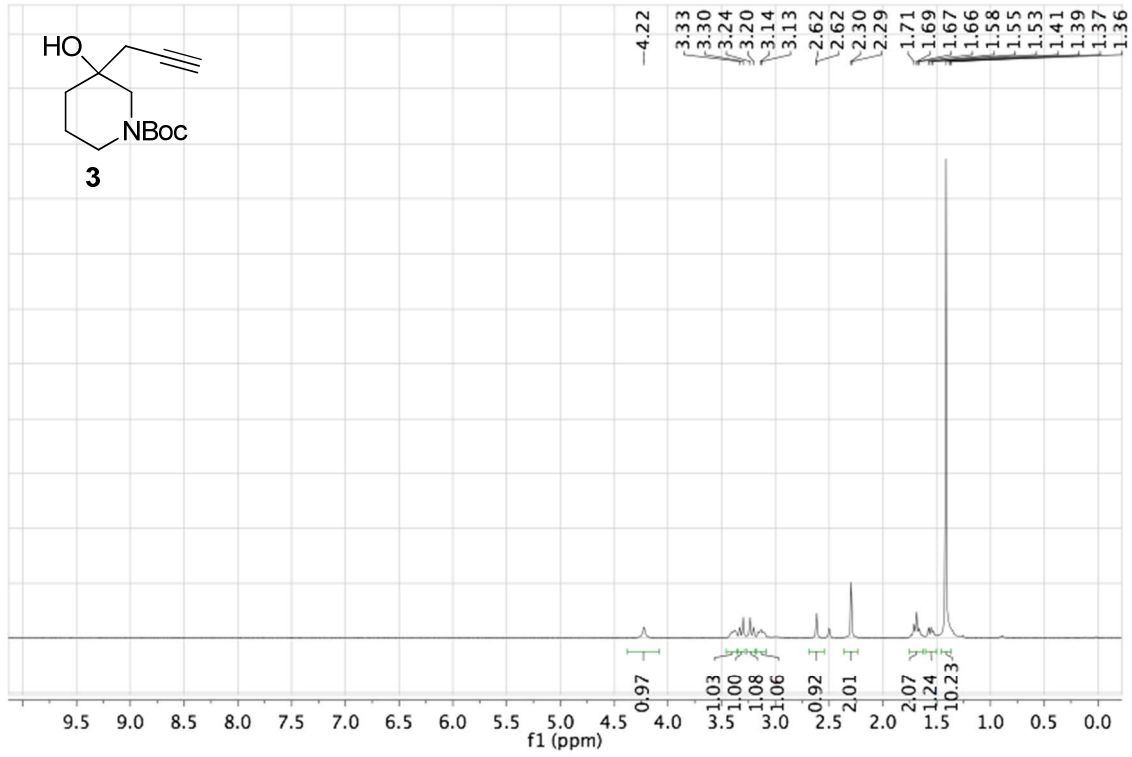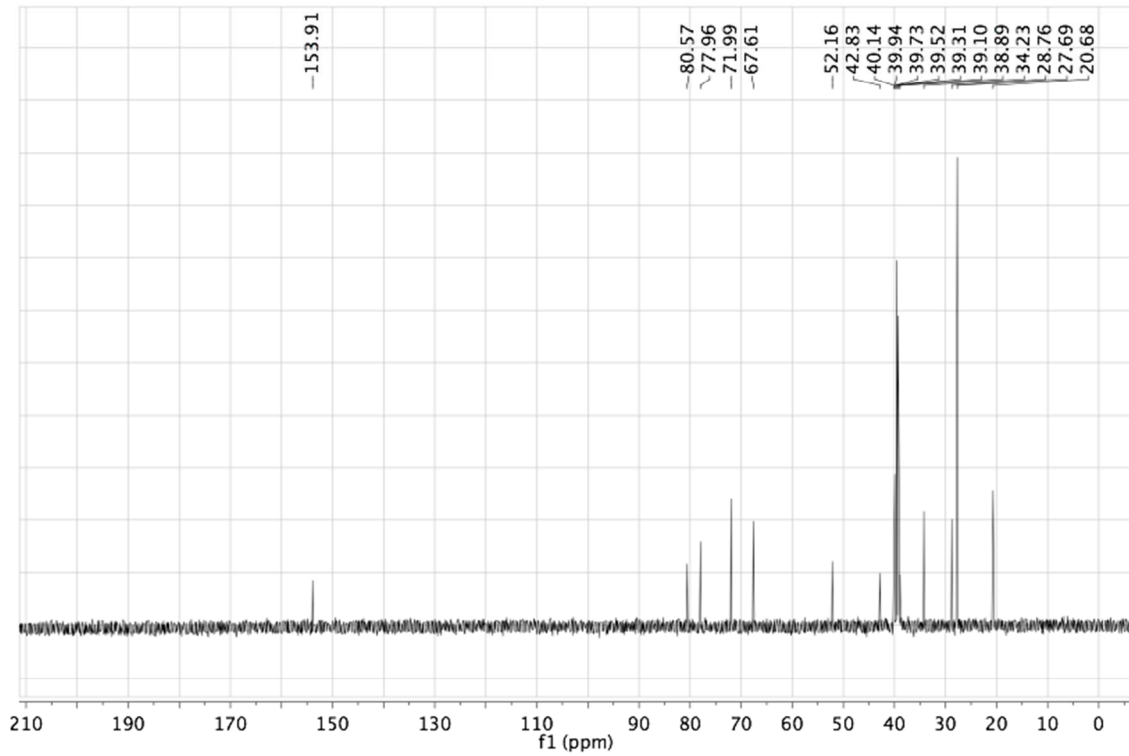

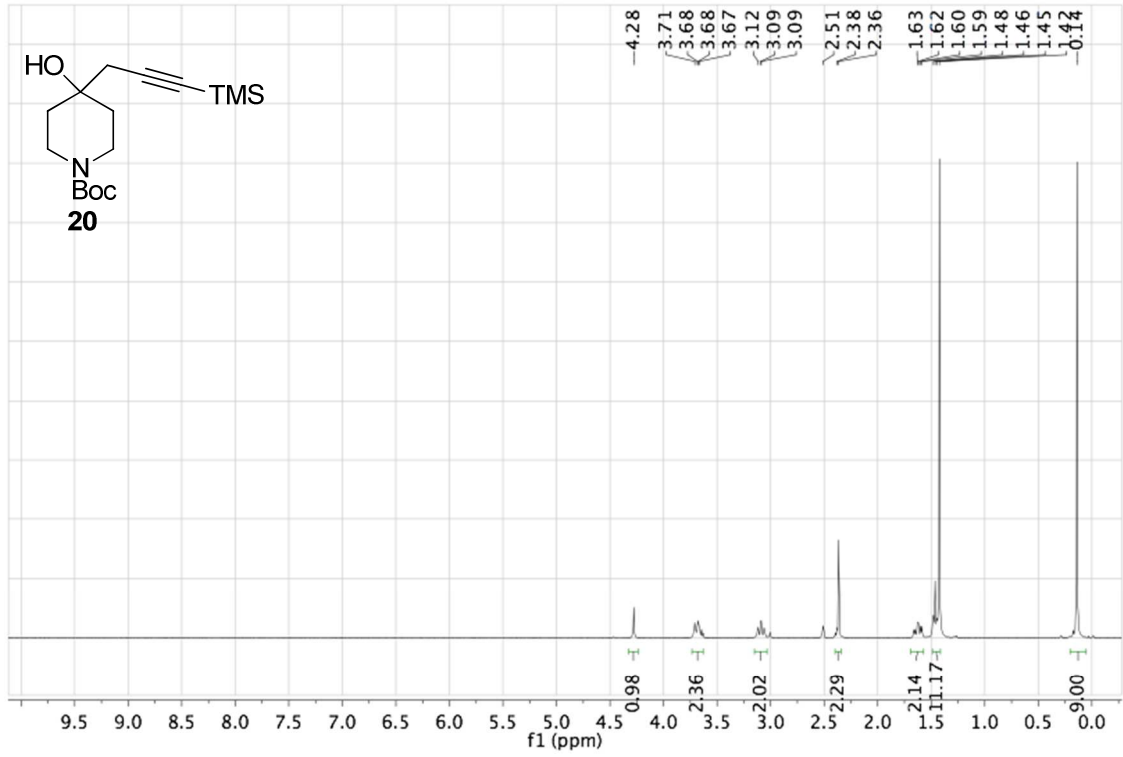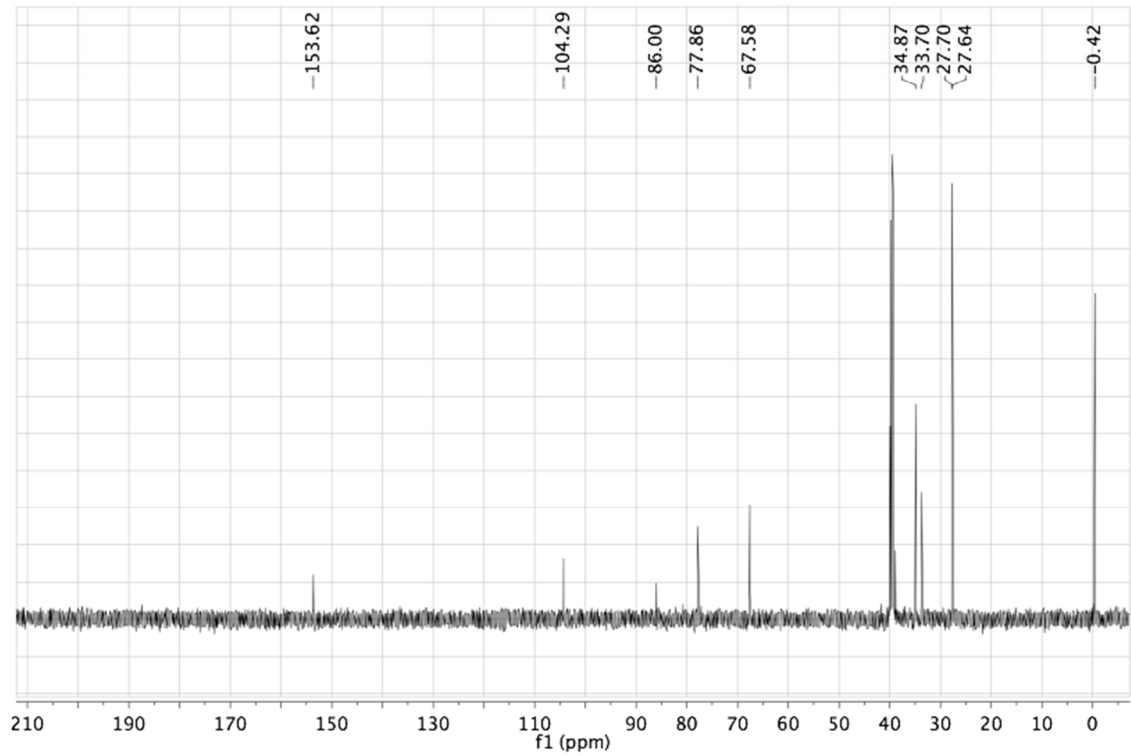

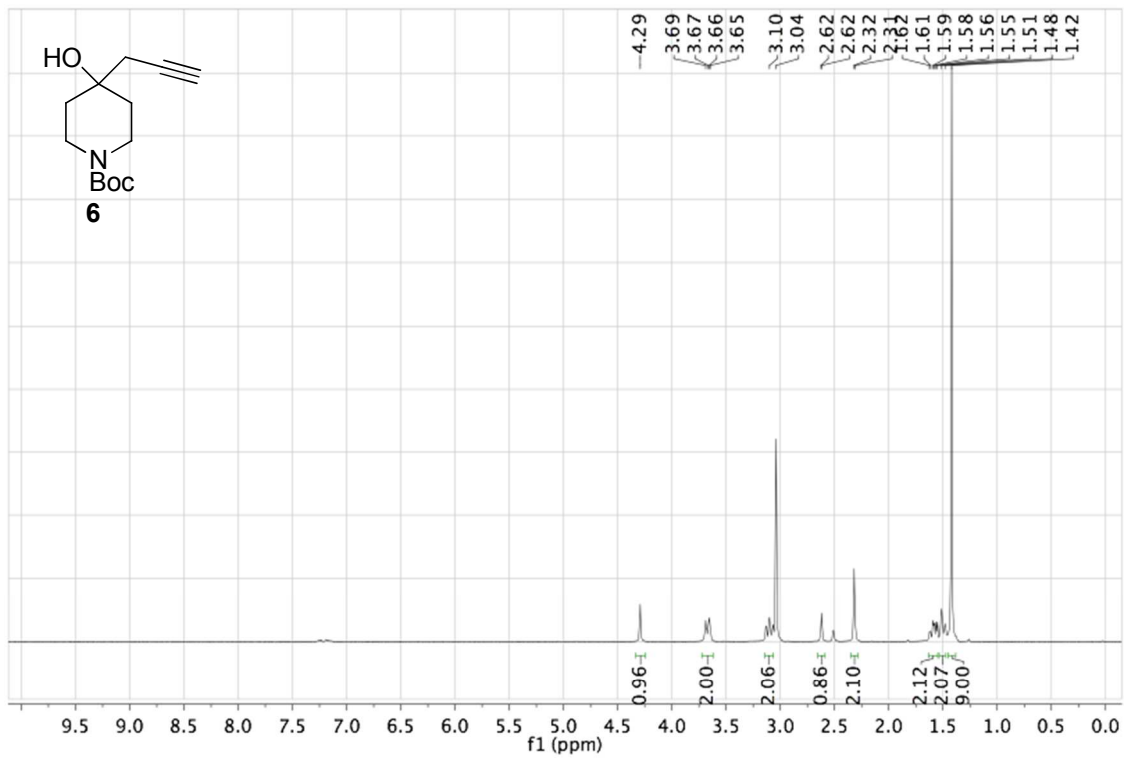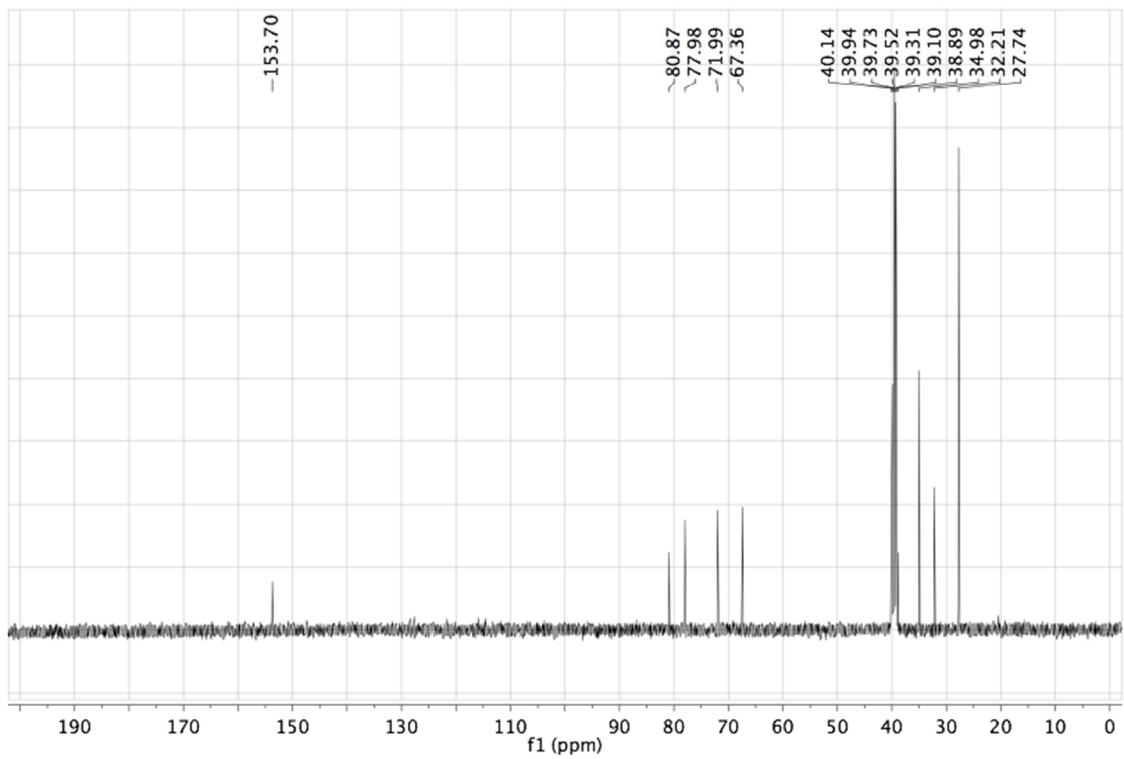



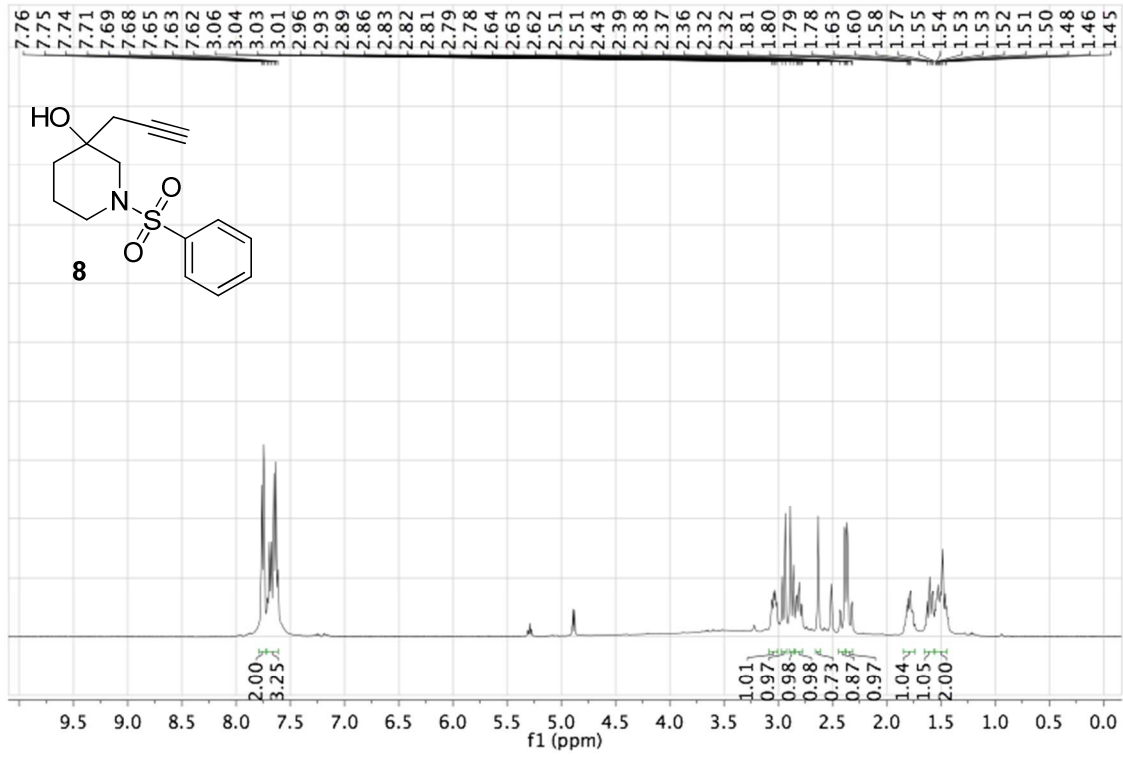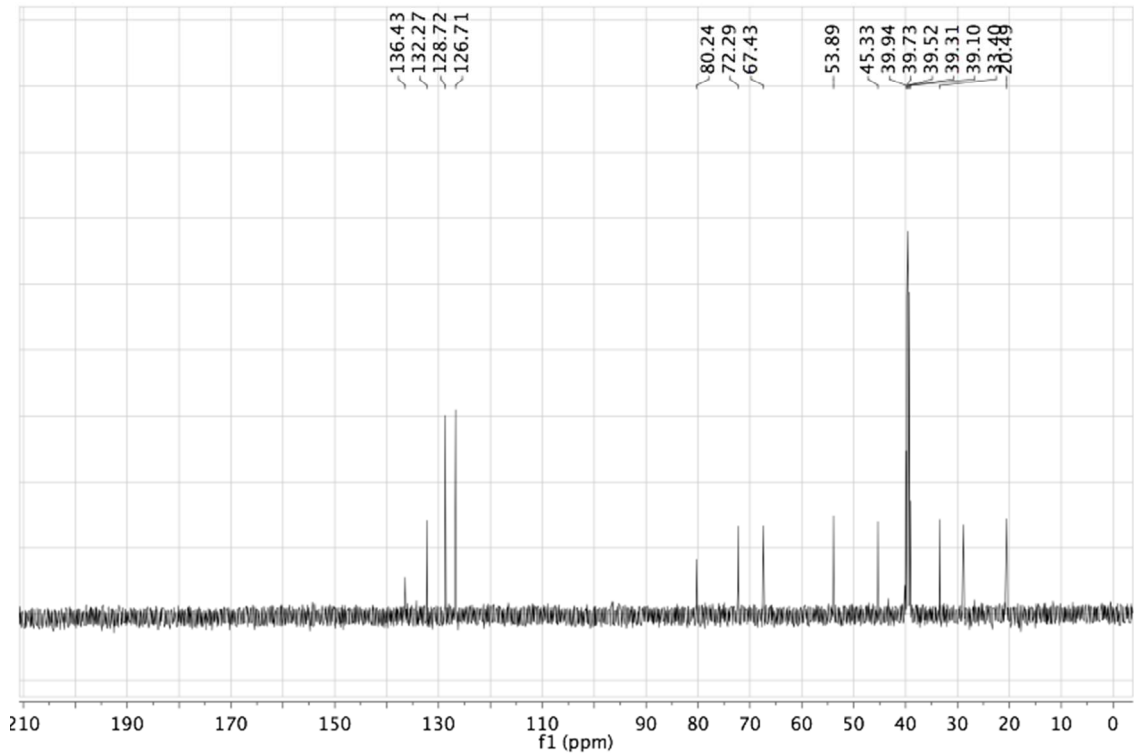

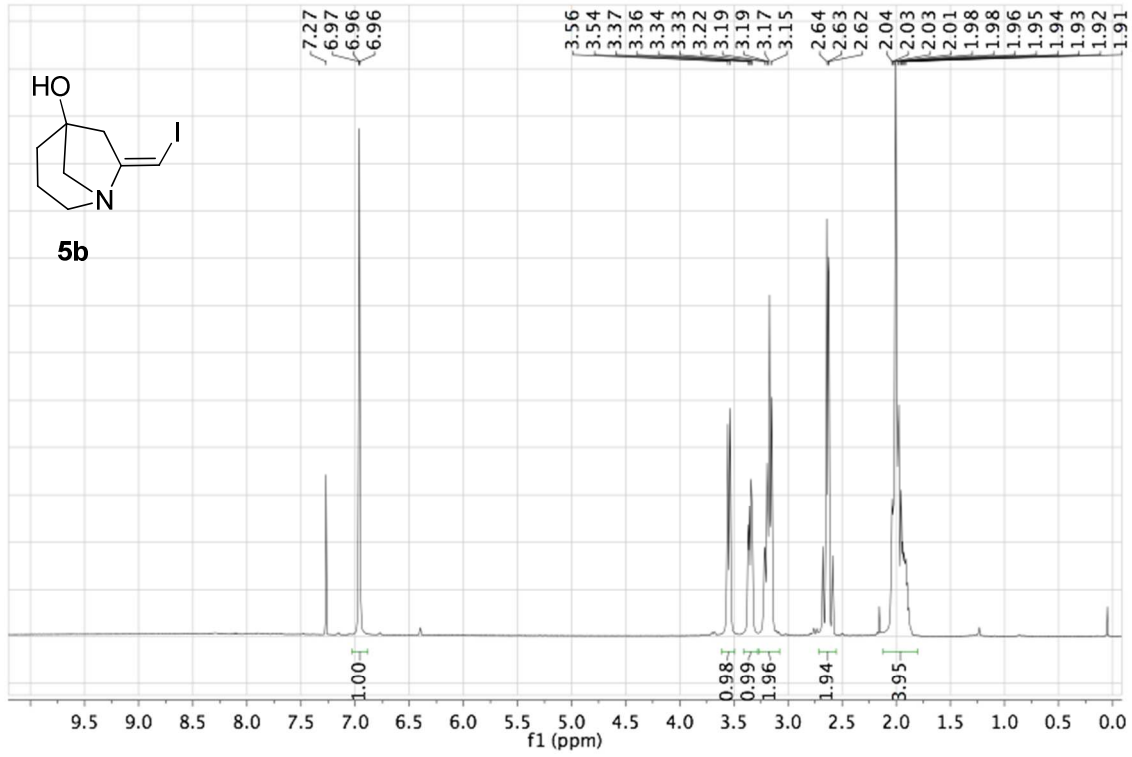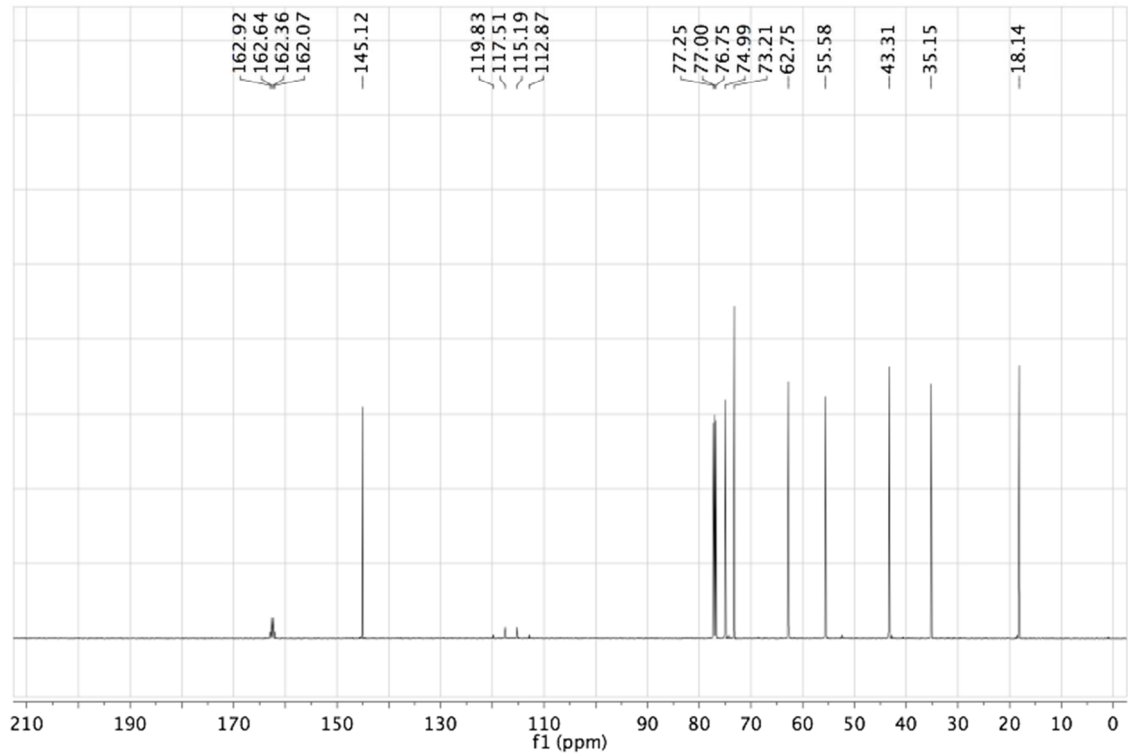

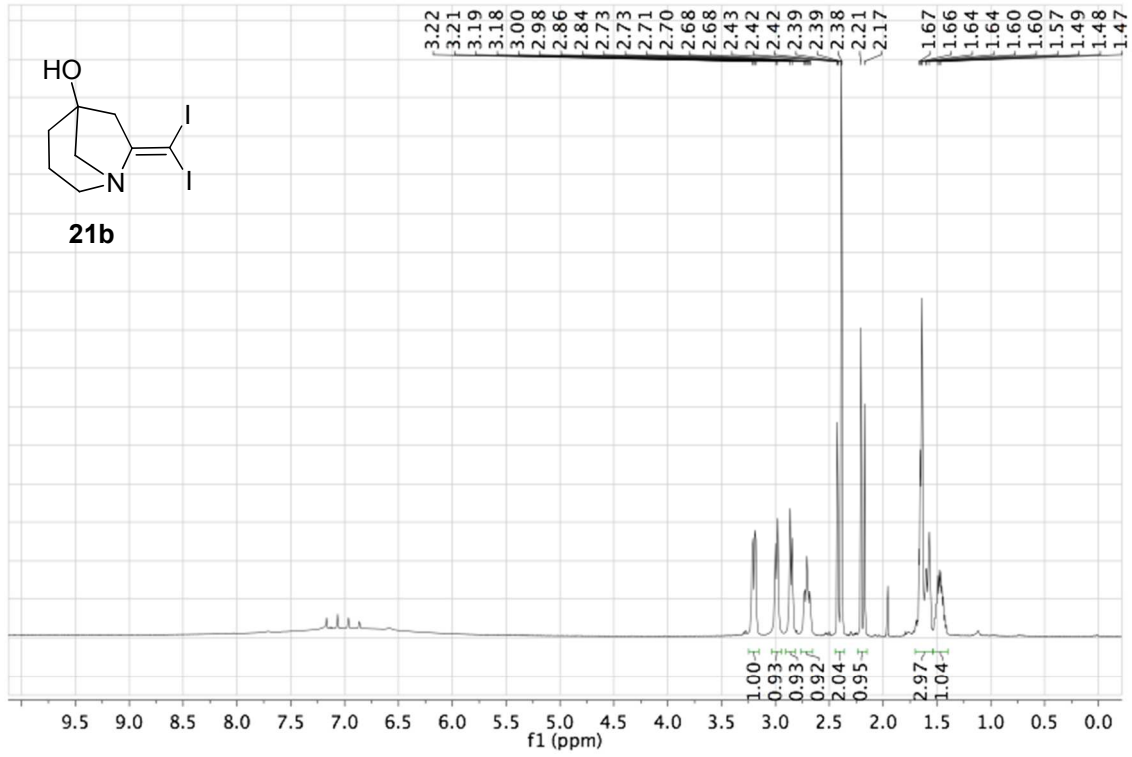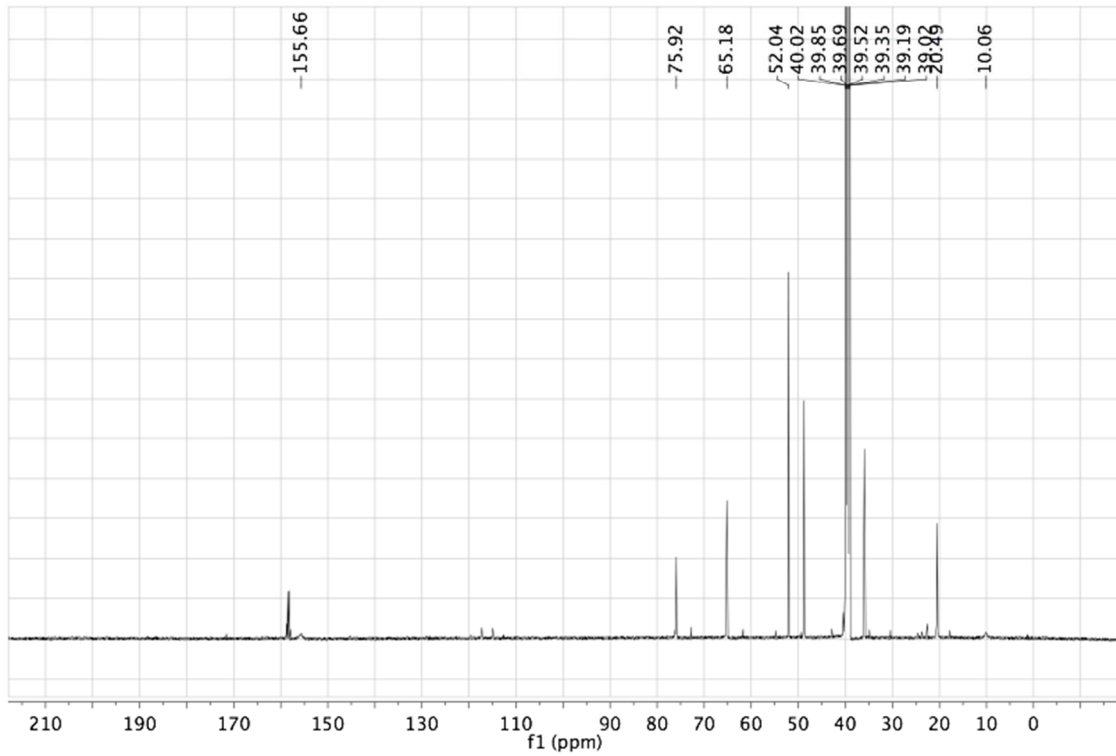

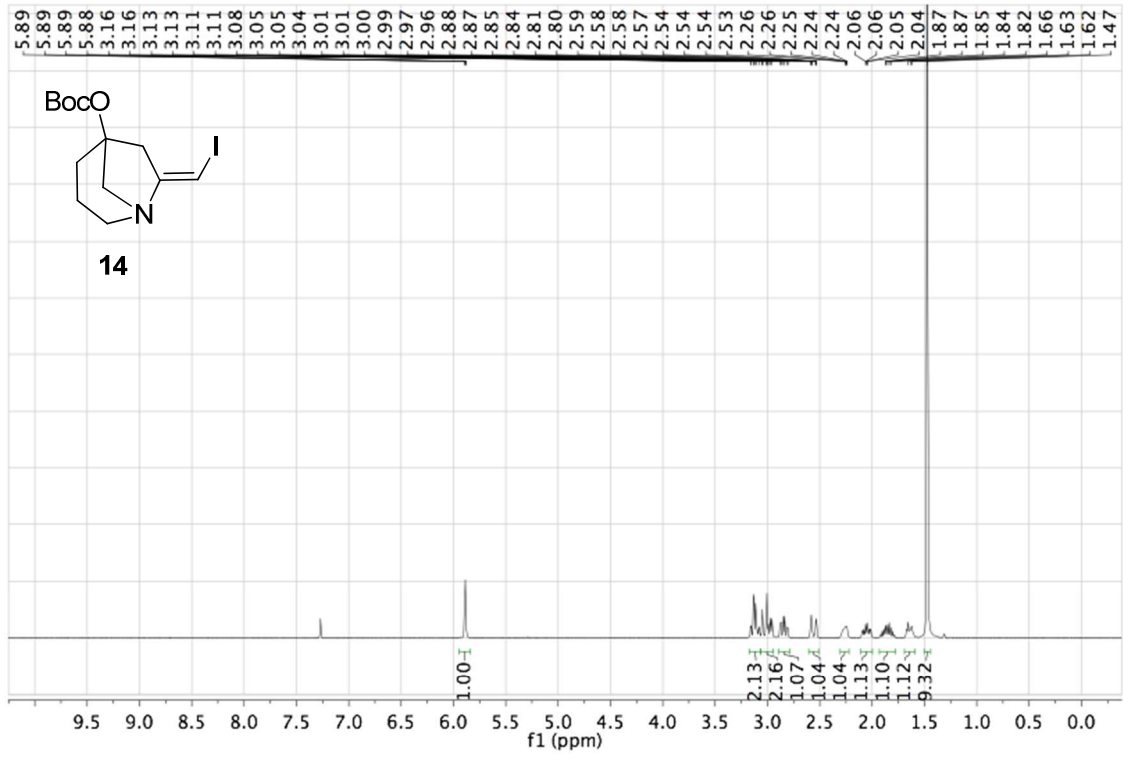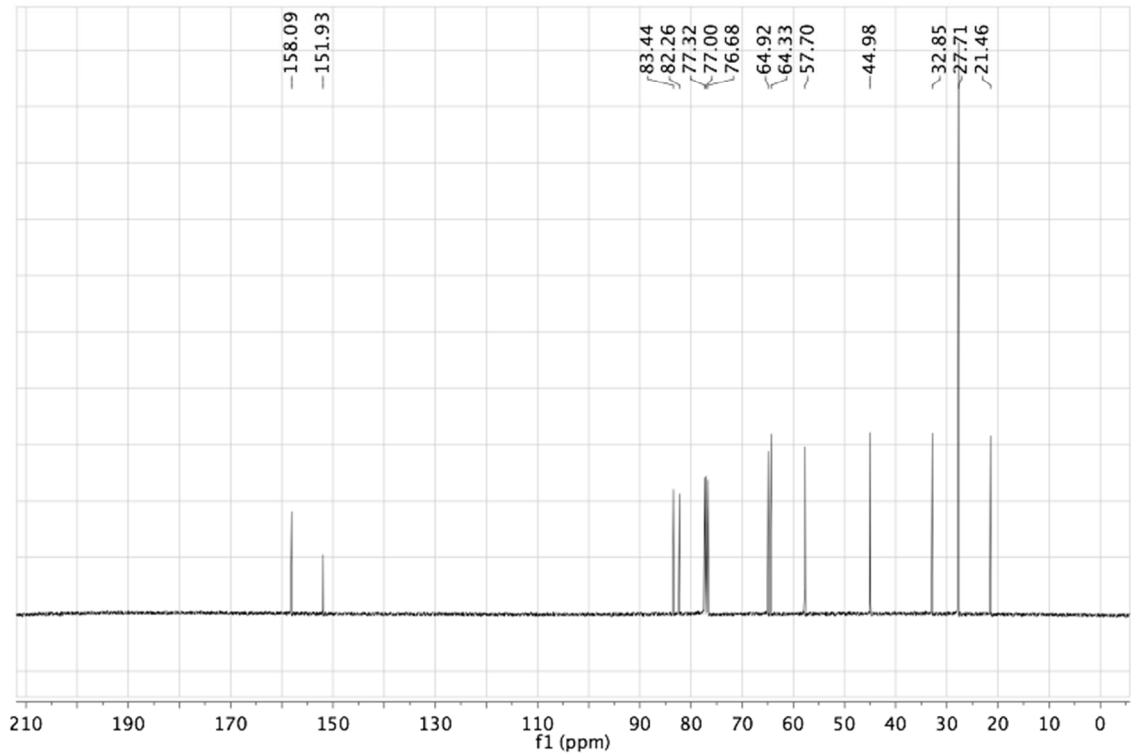

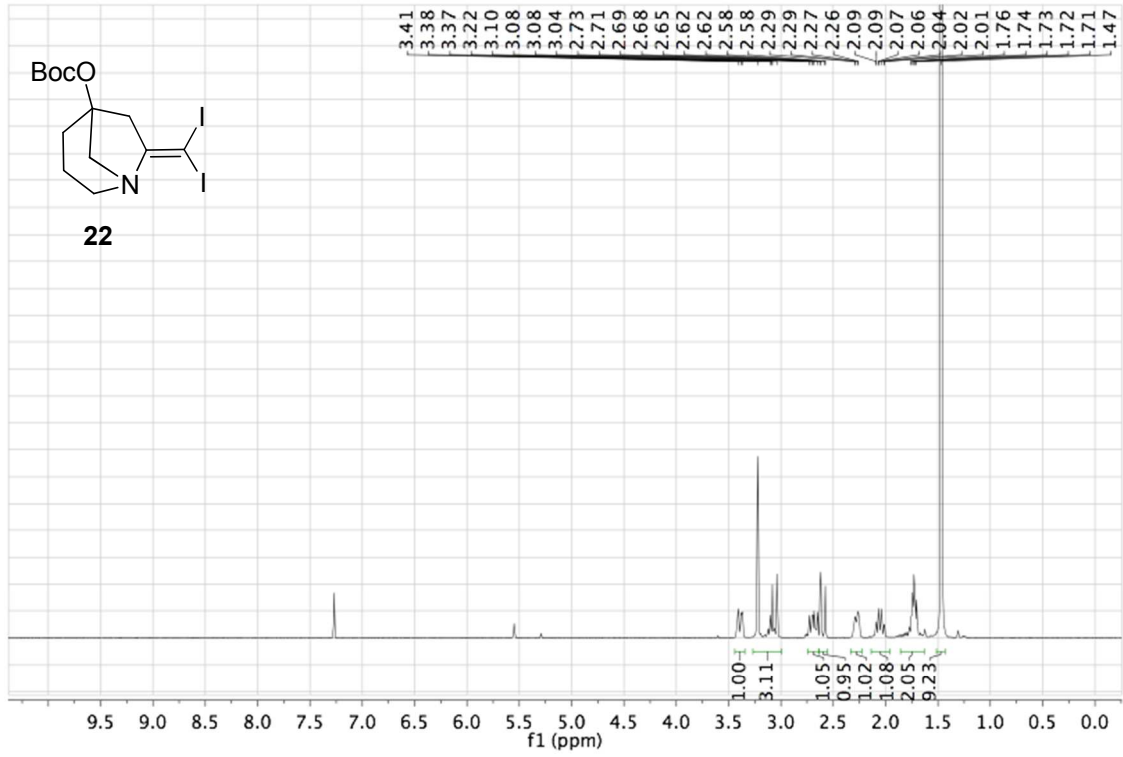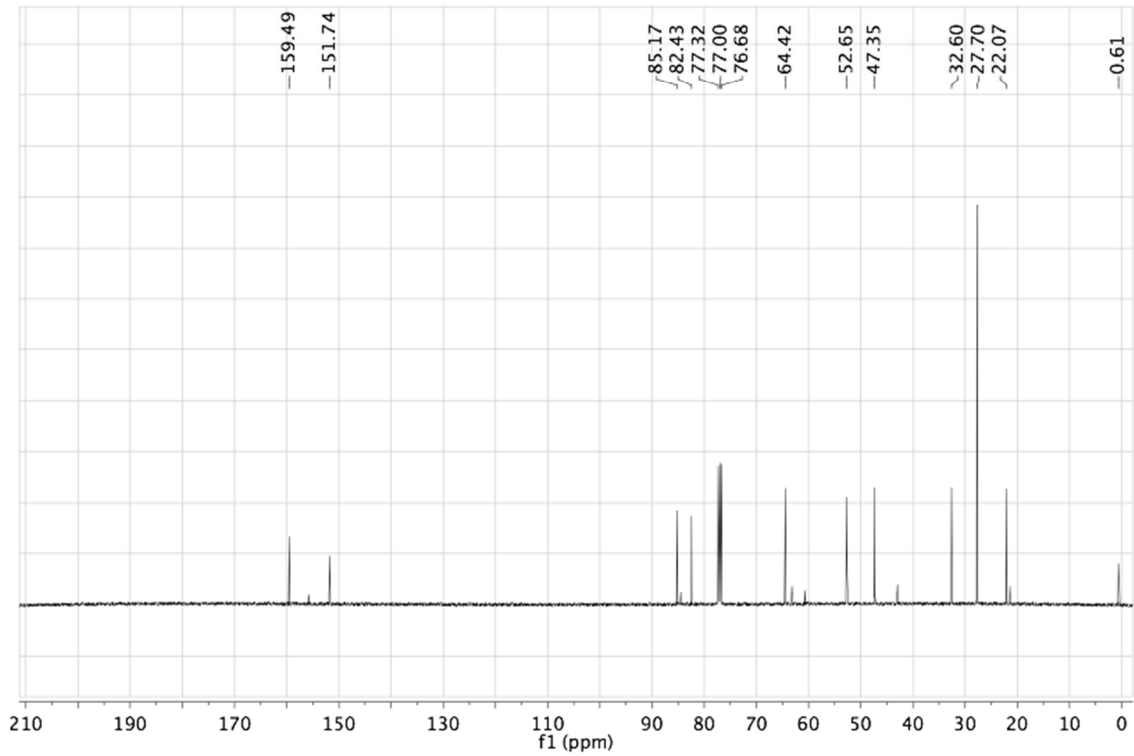

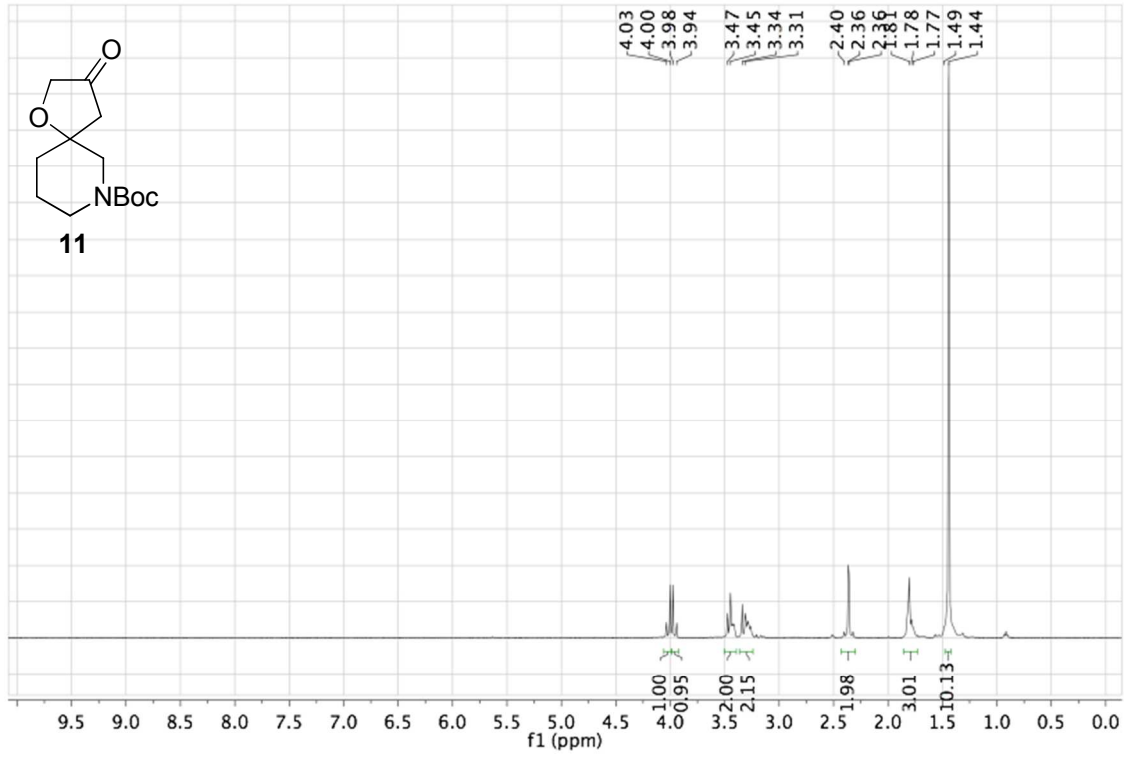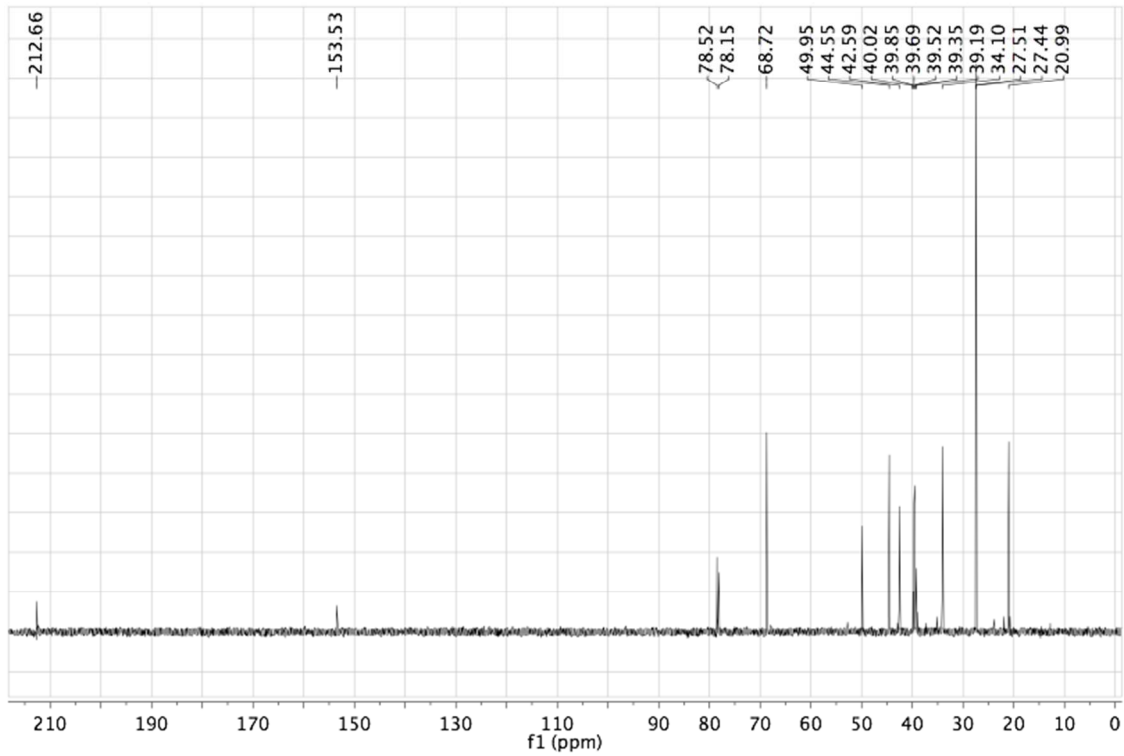

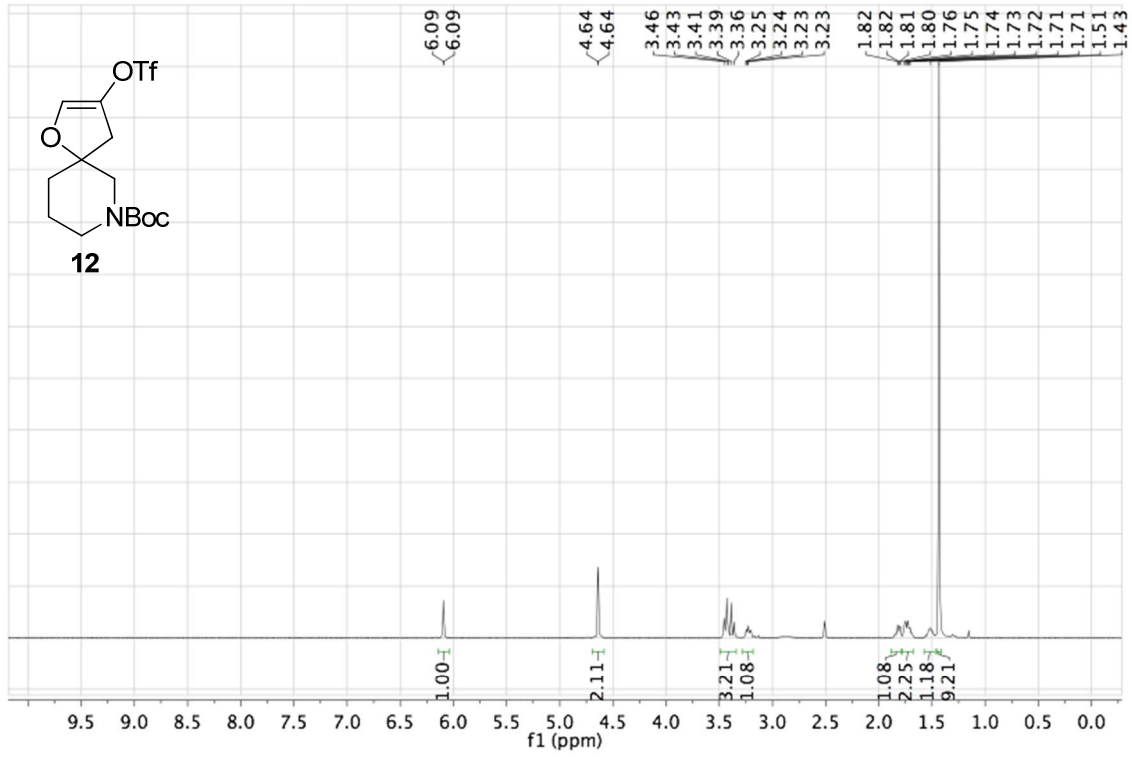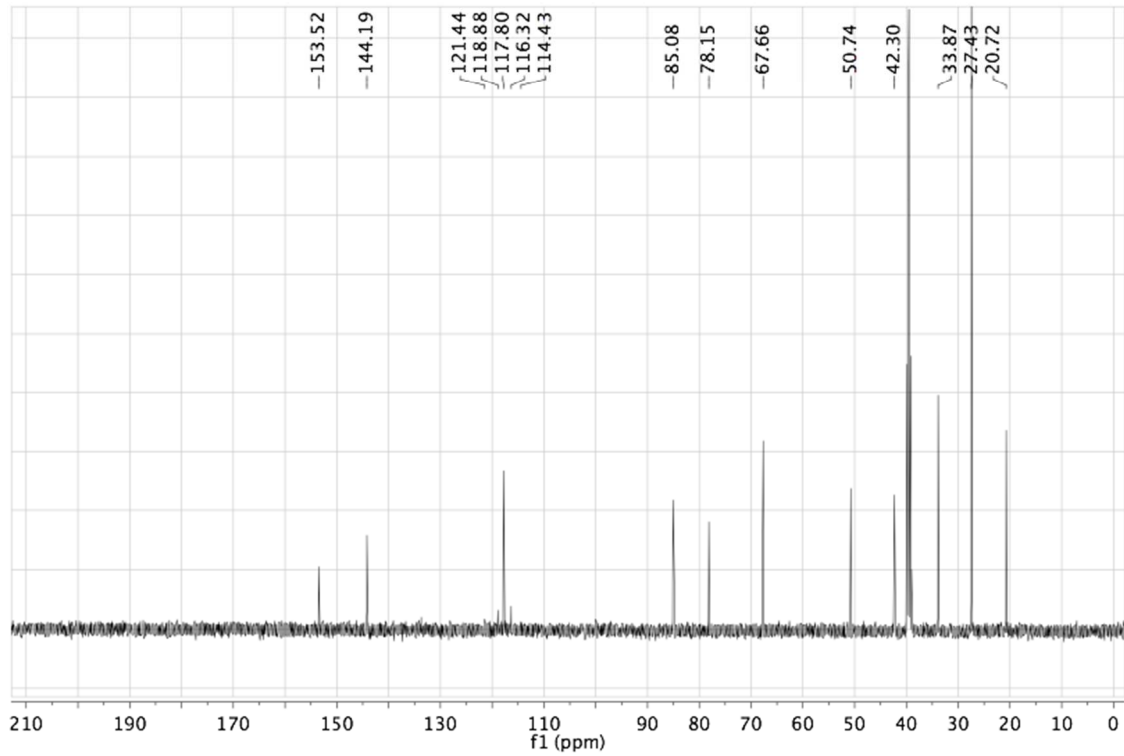

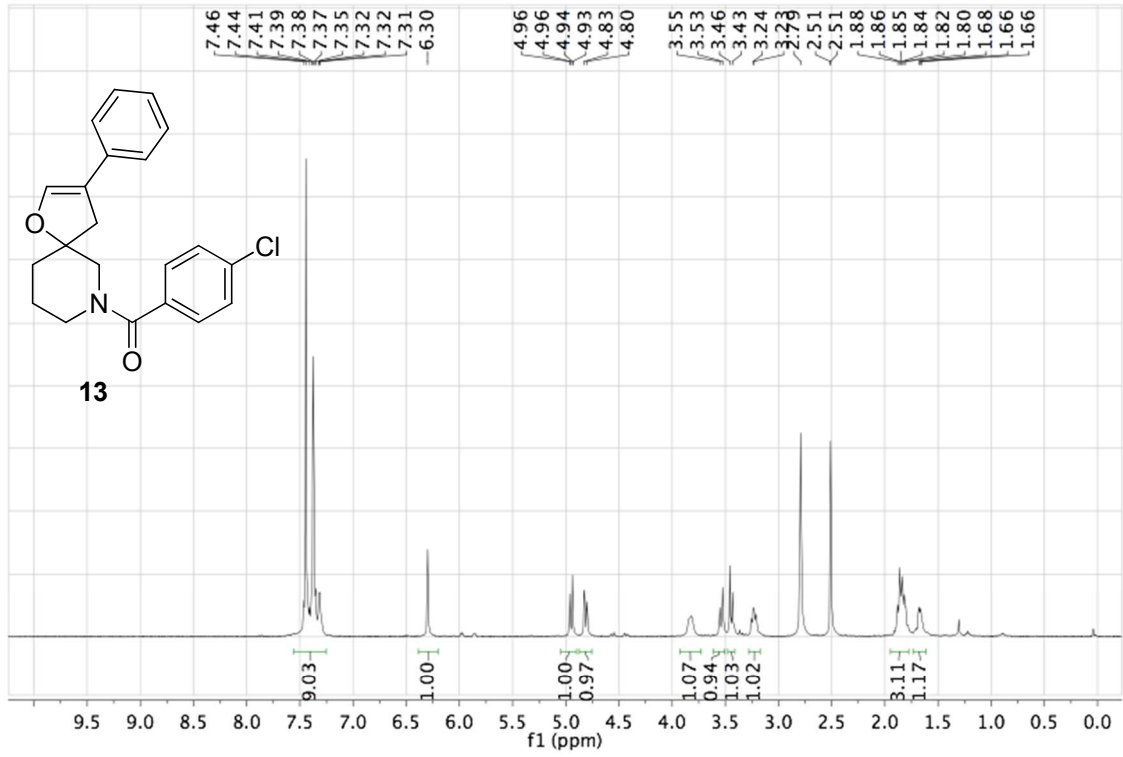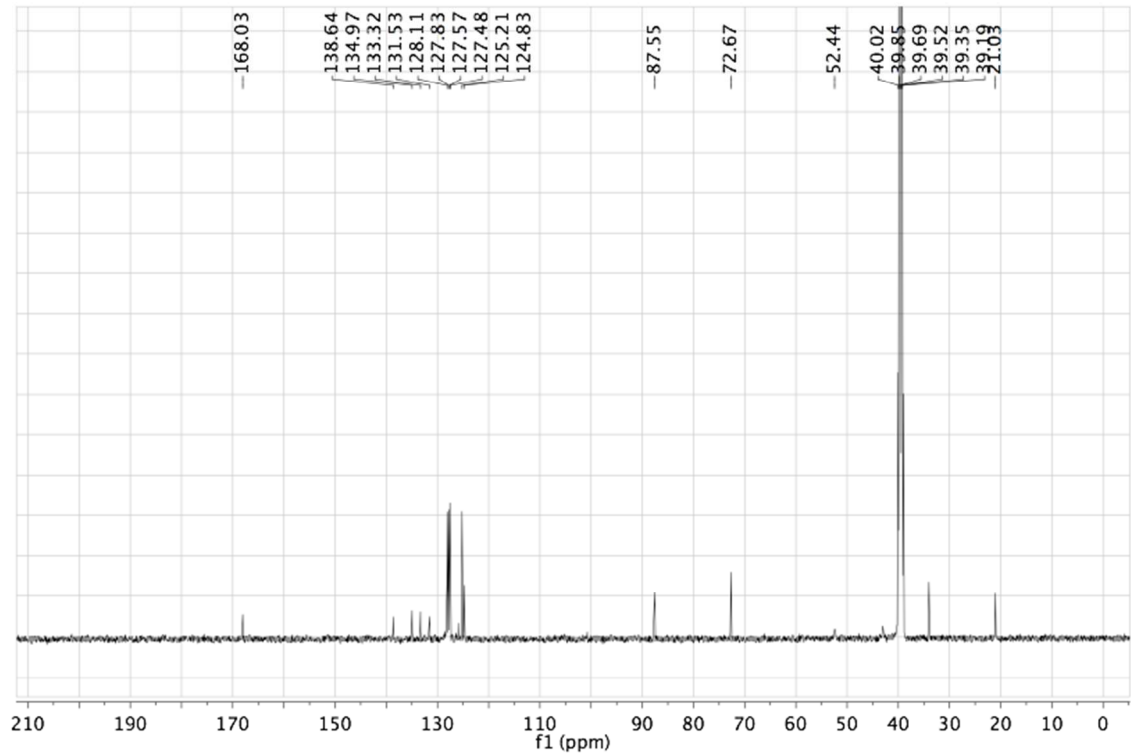



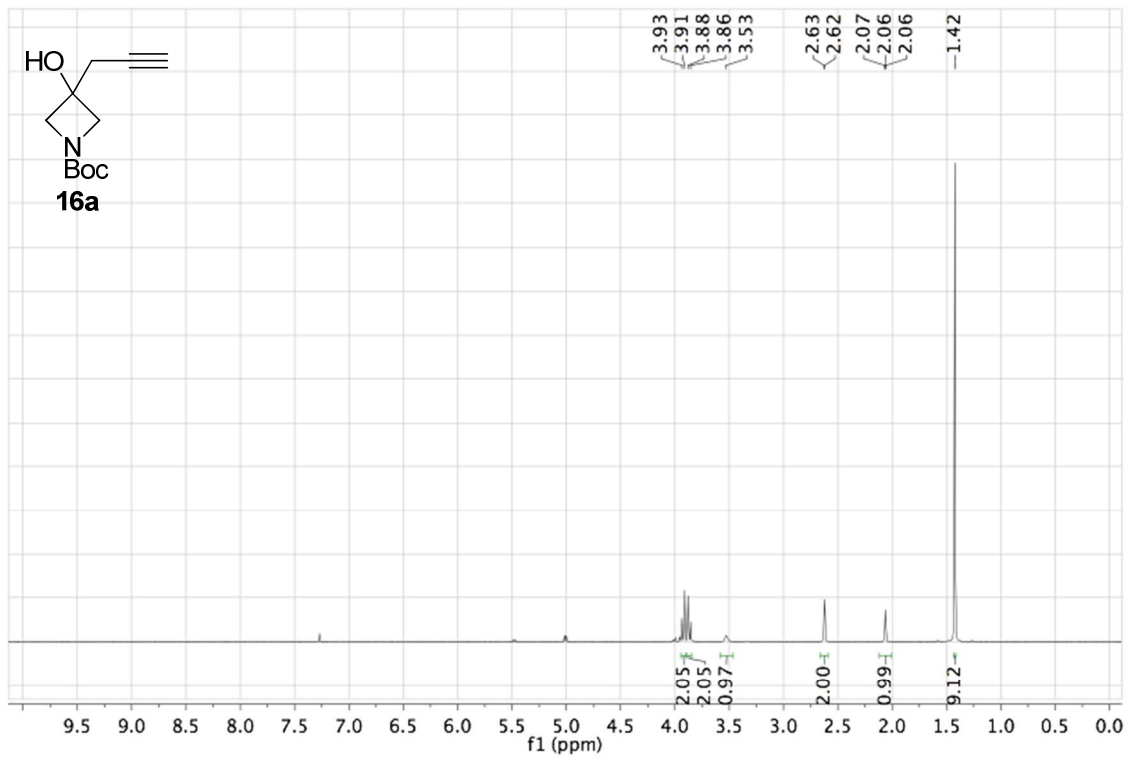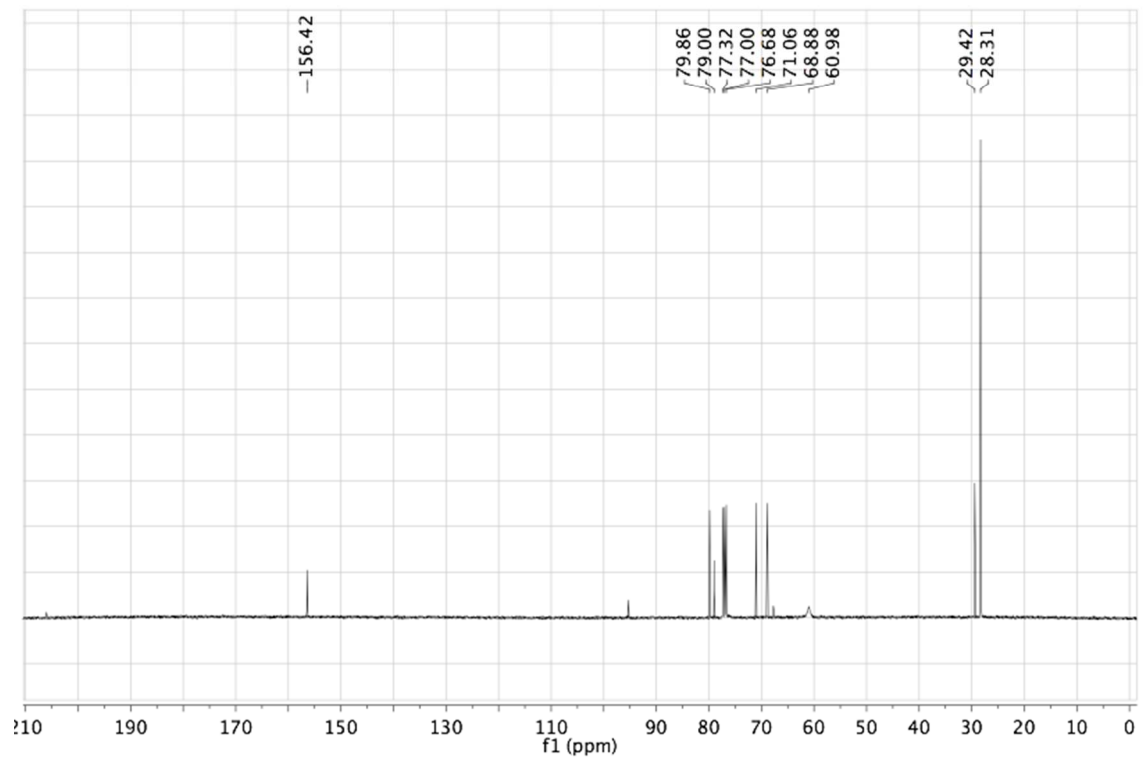

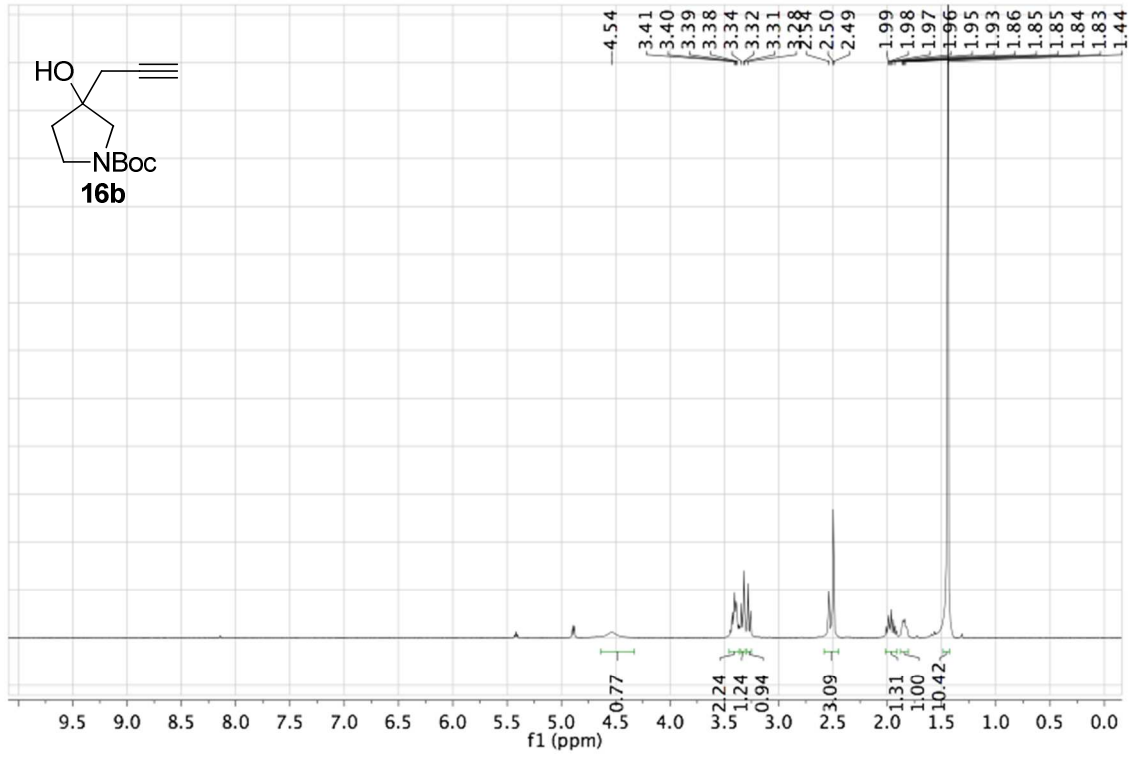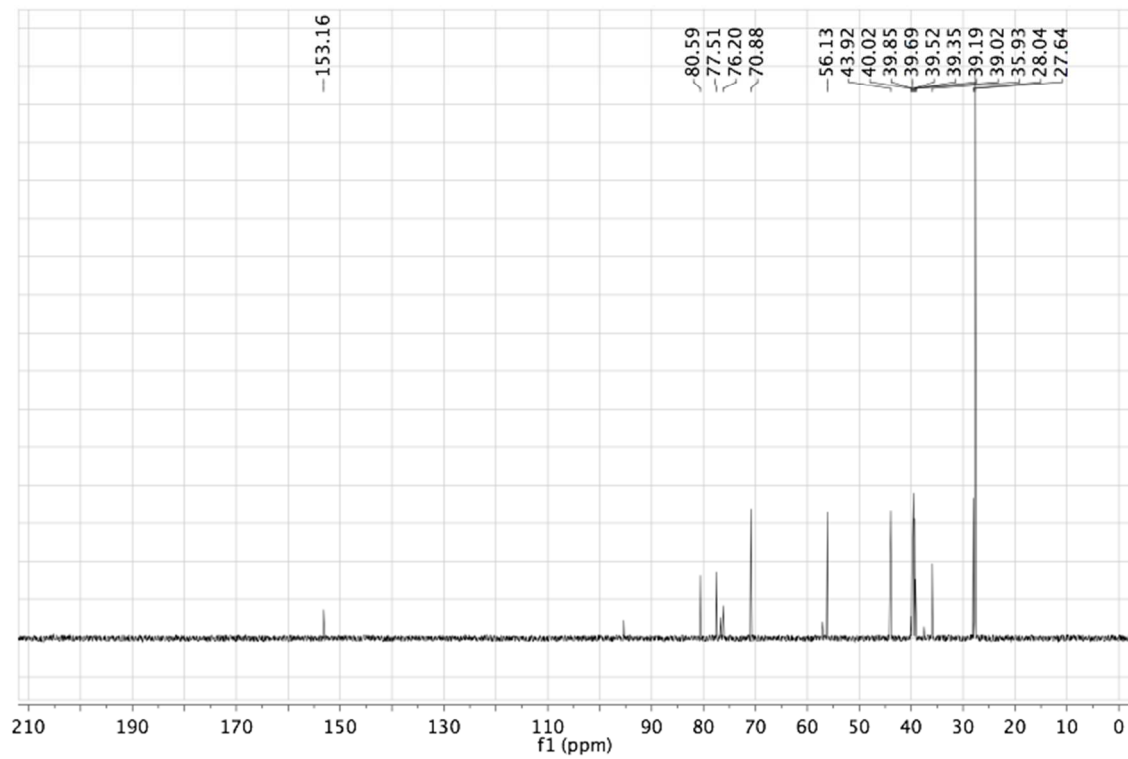

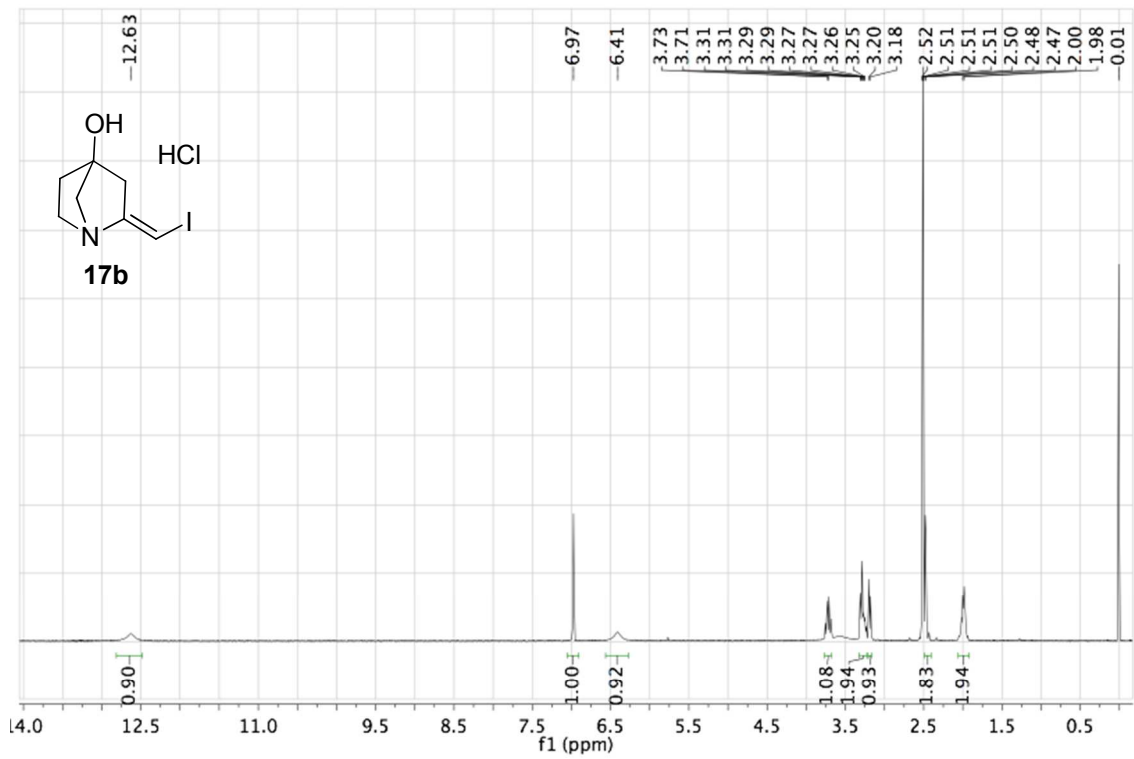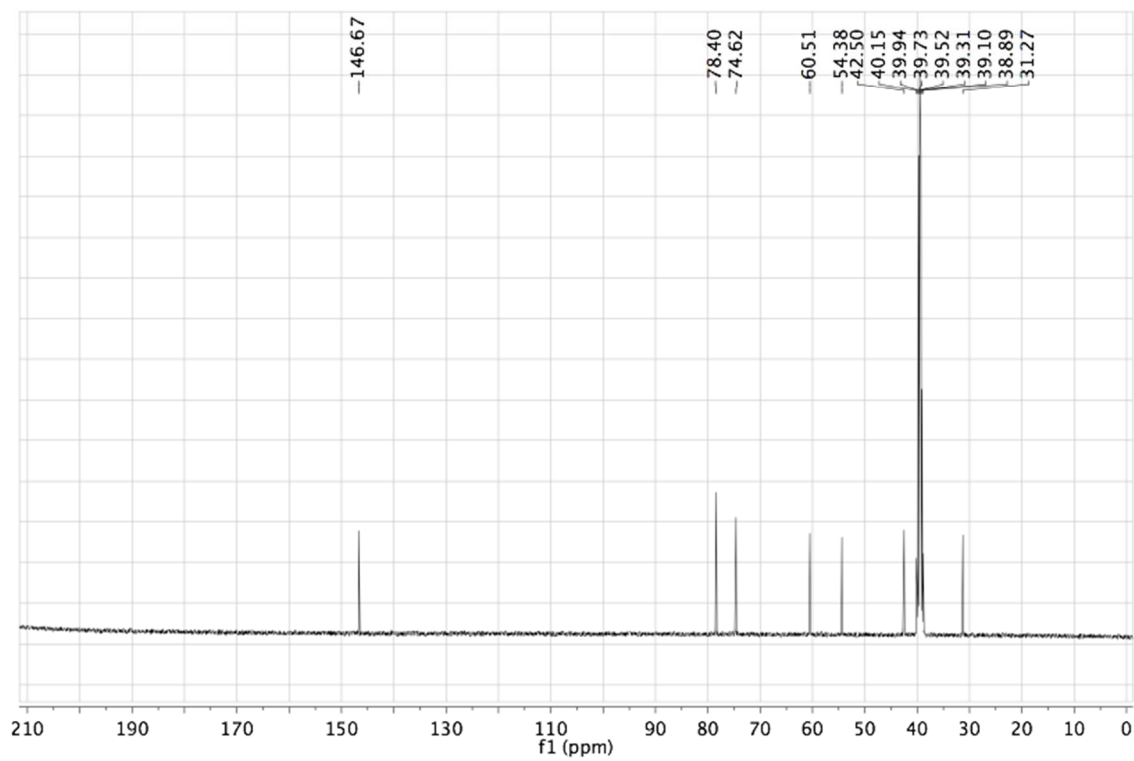

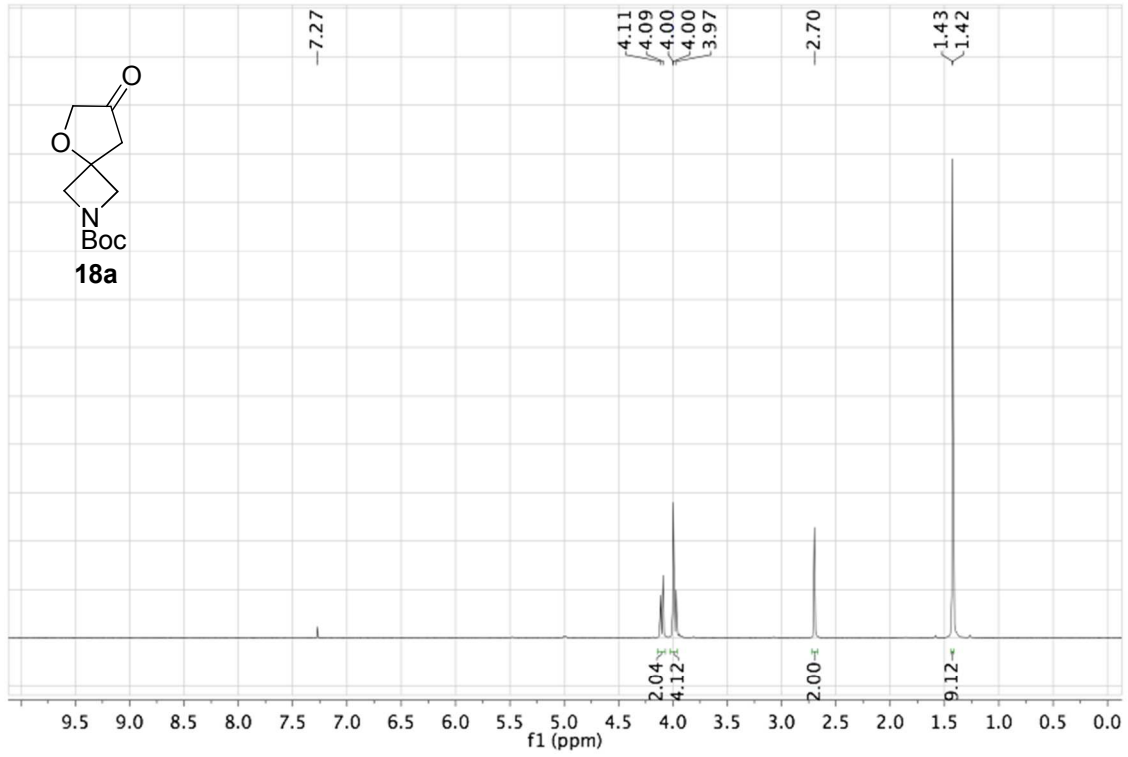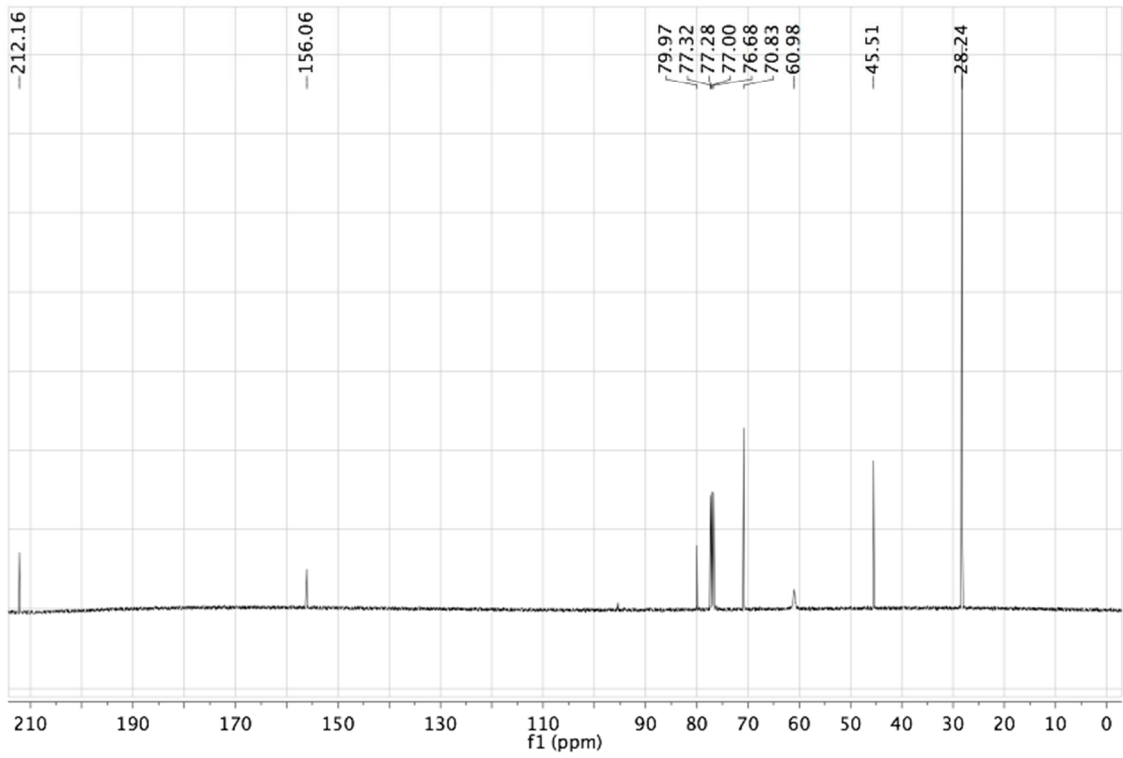

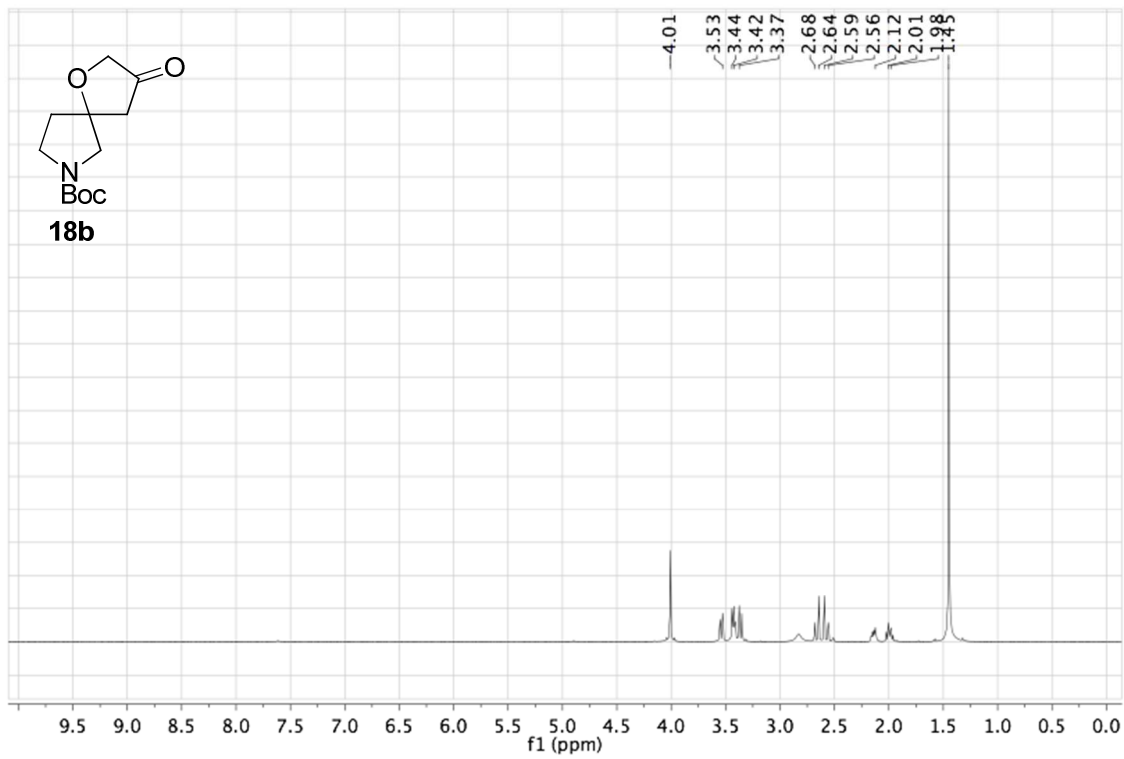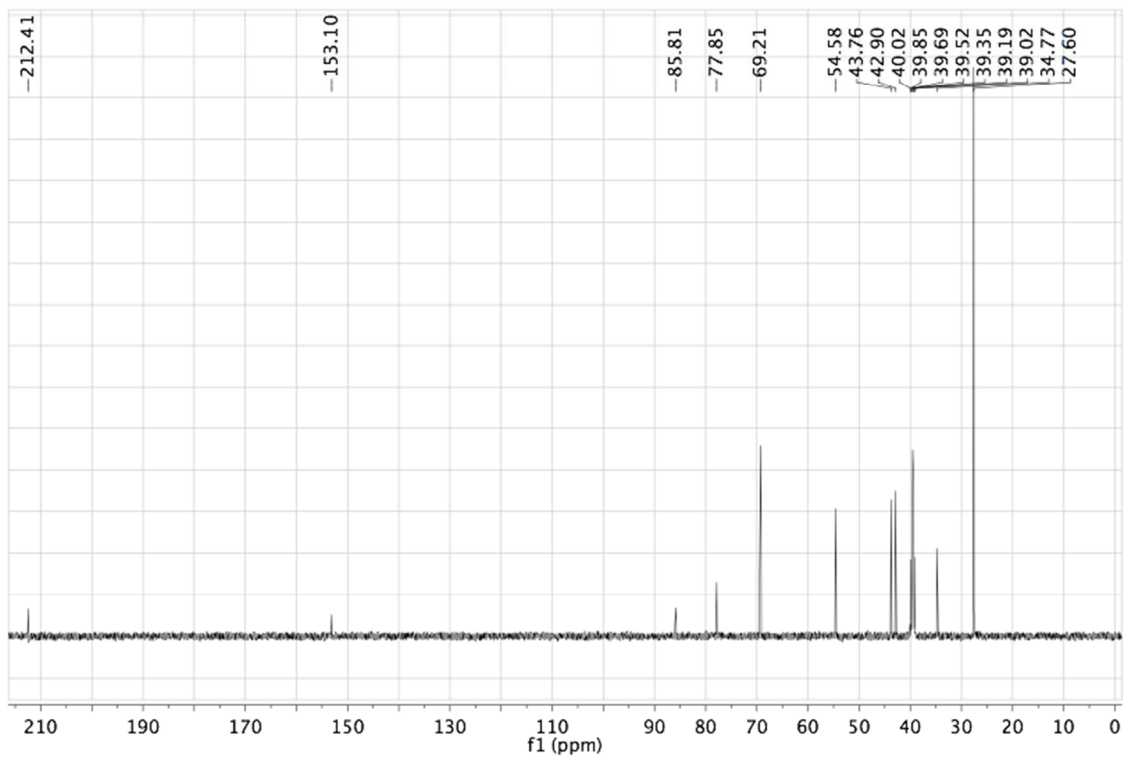

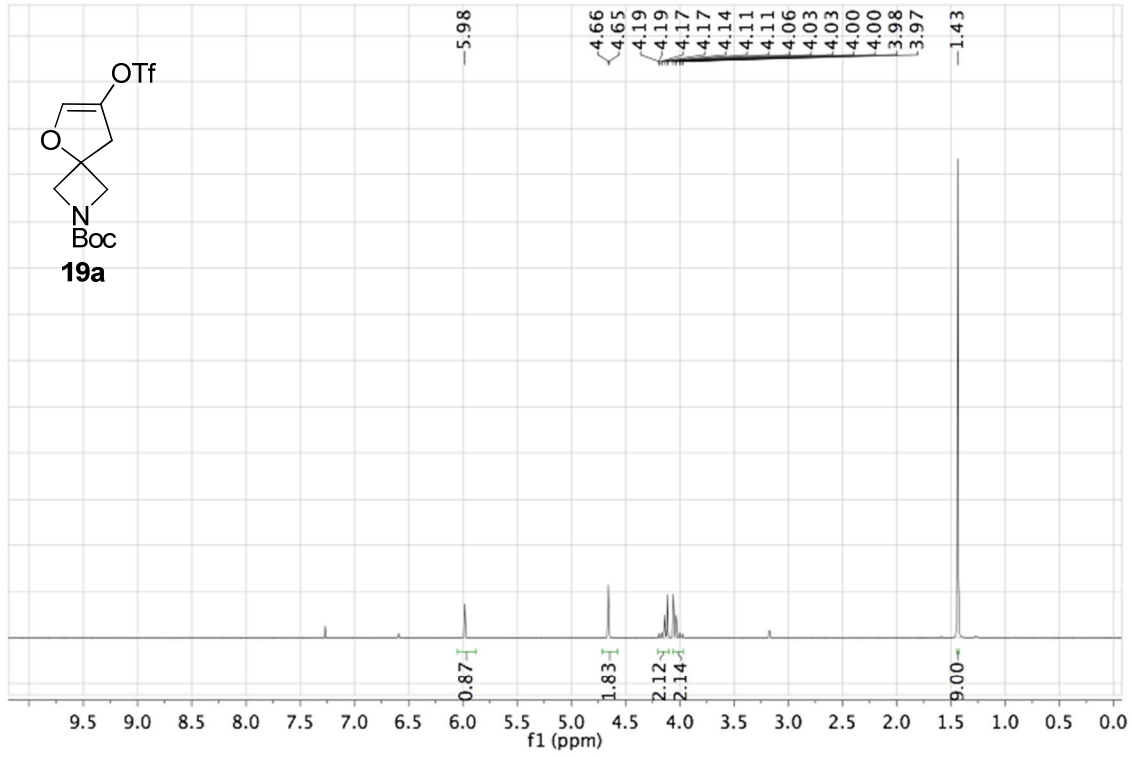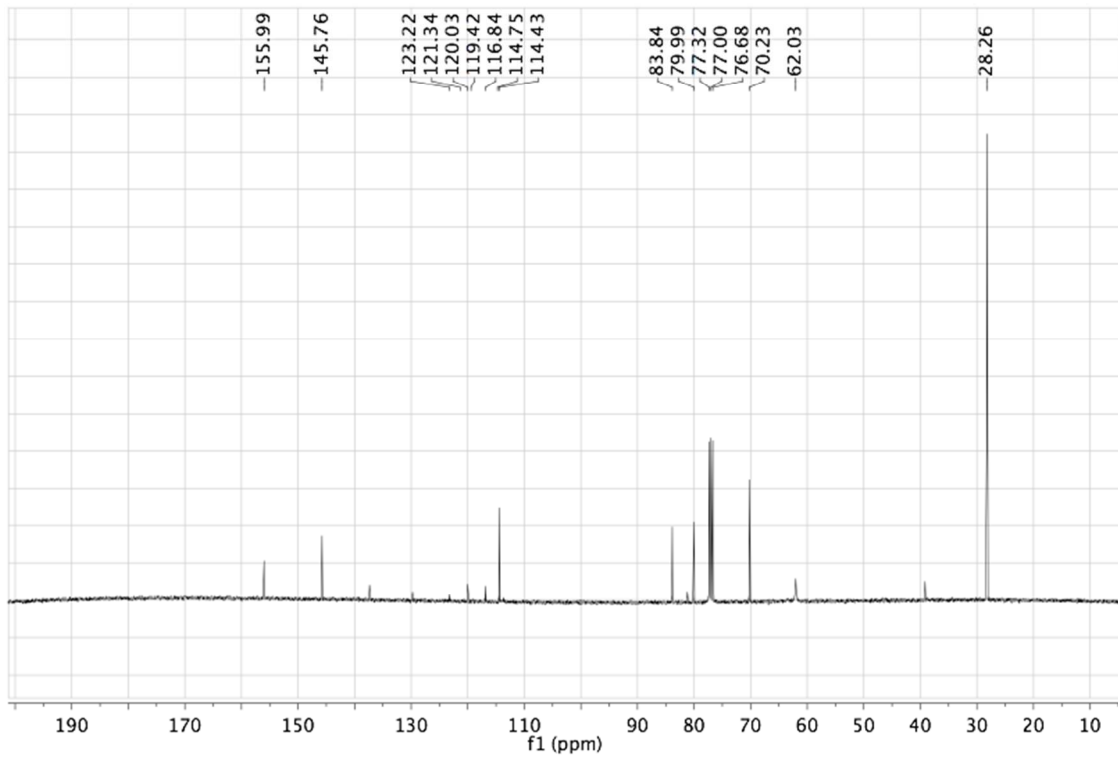

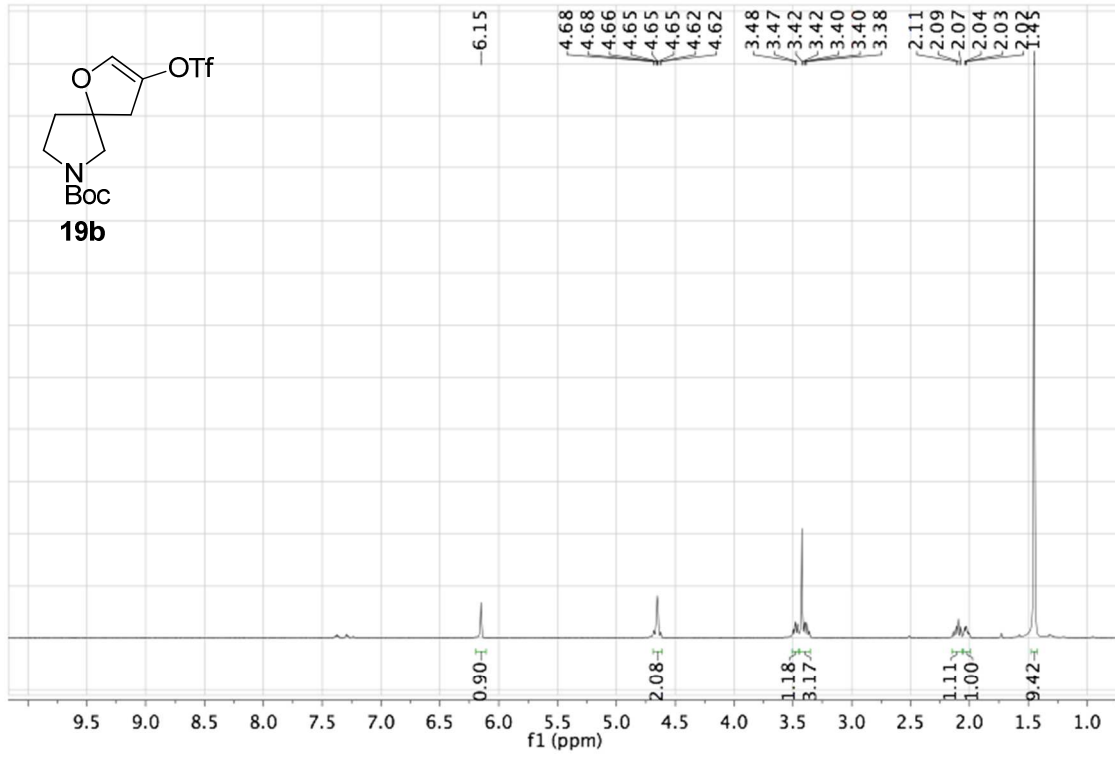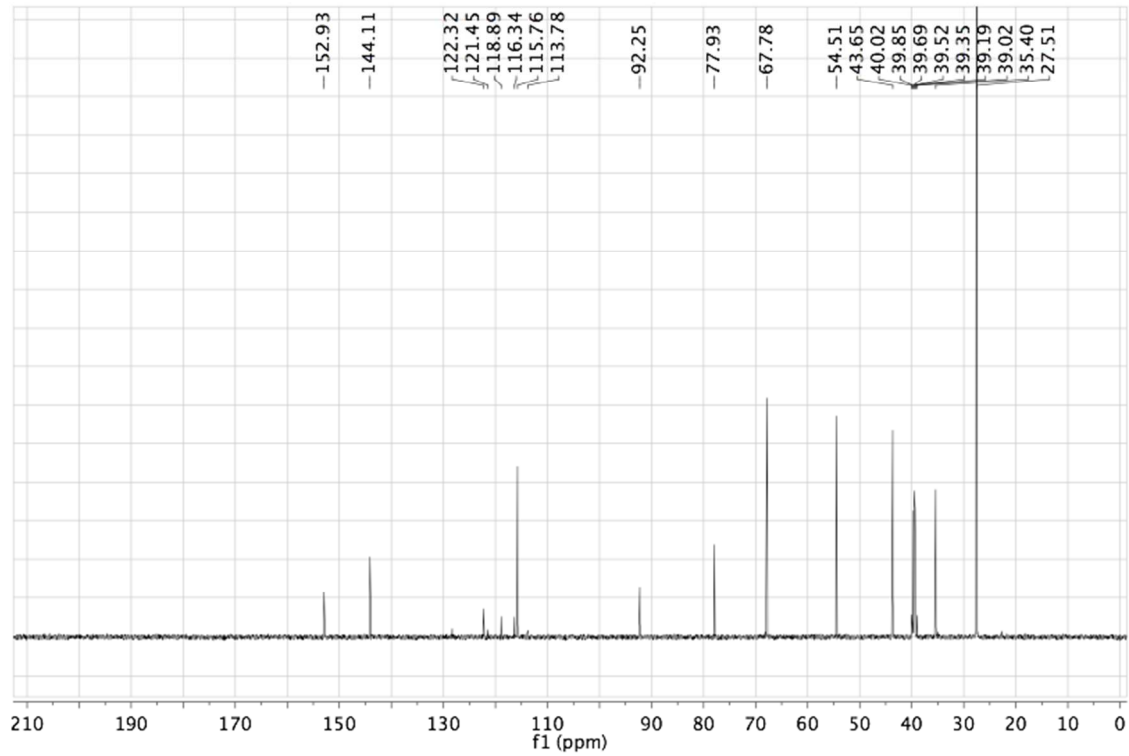

# Library Compounds

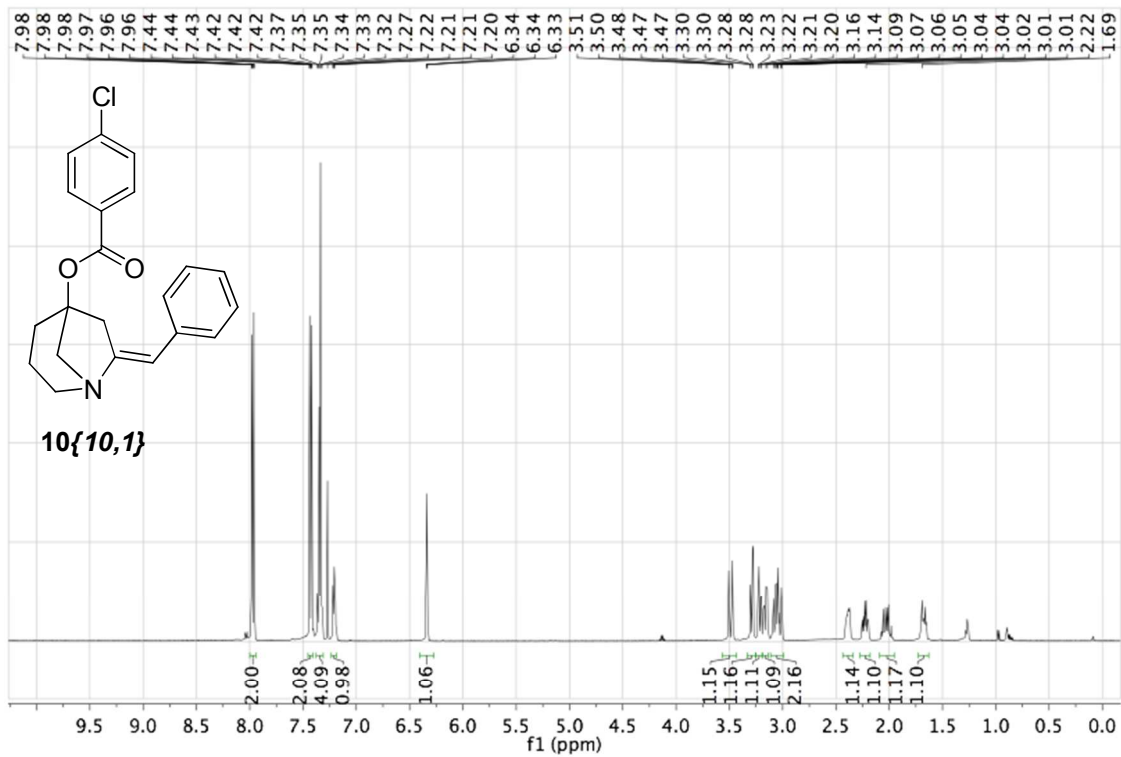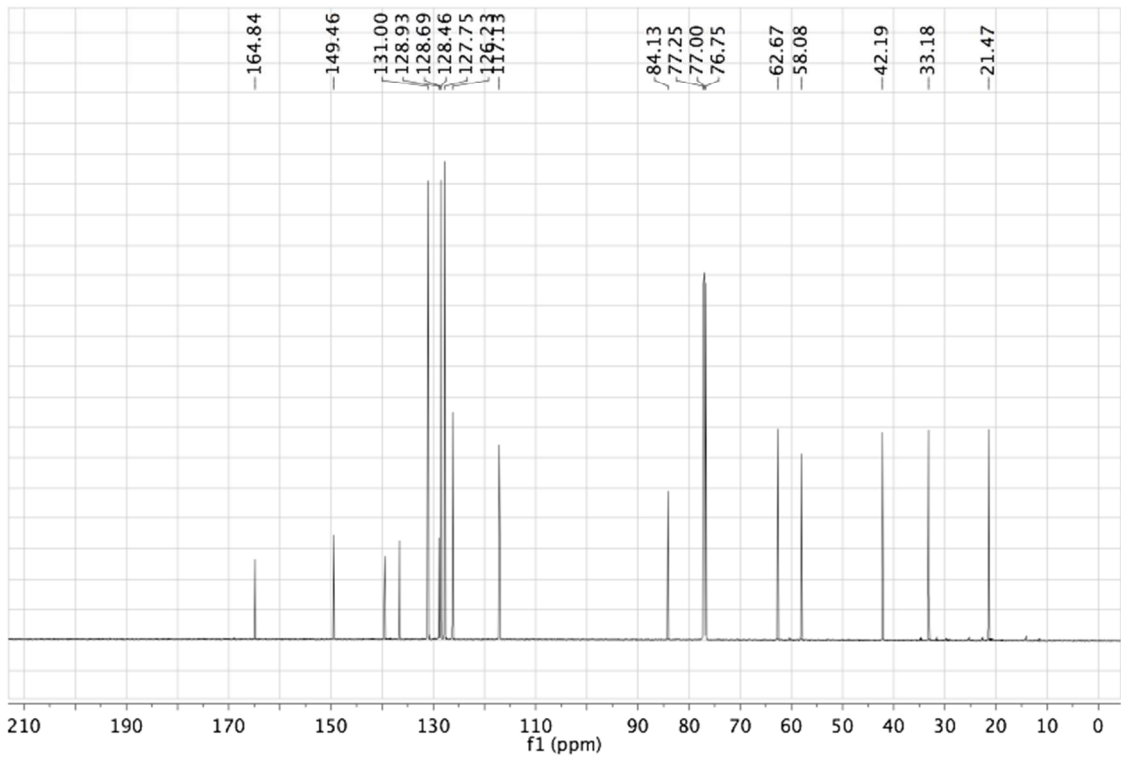



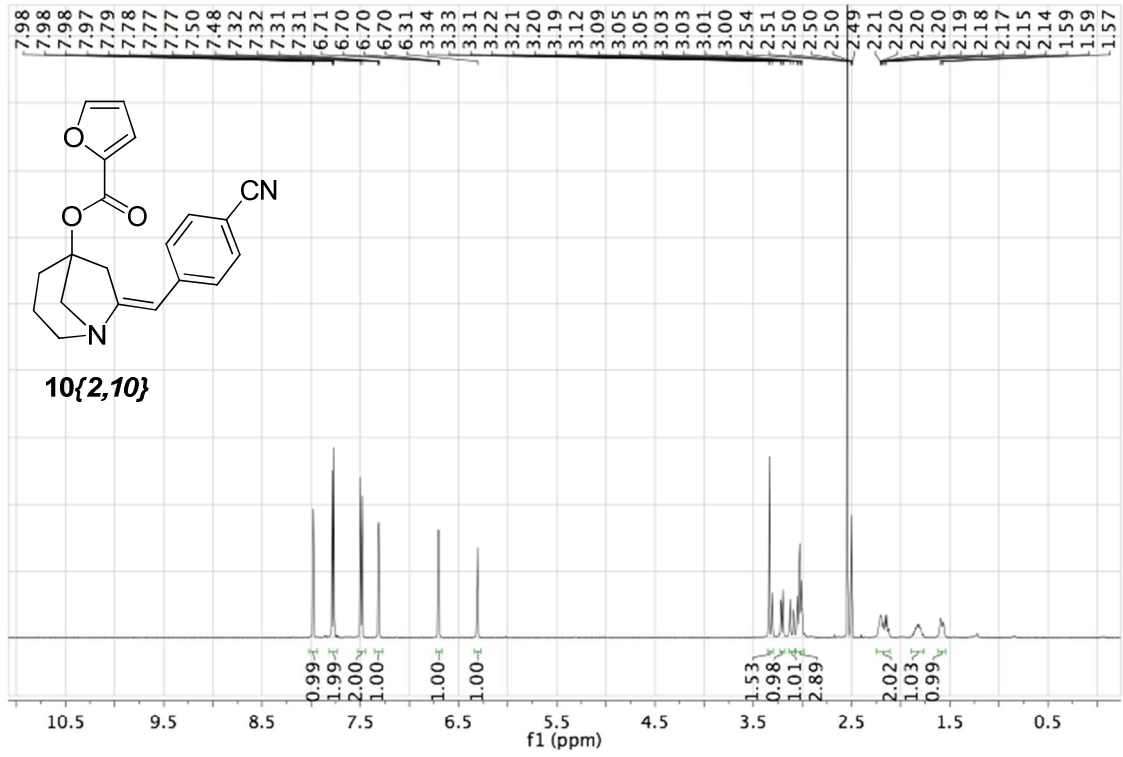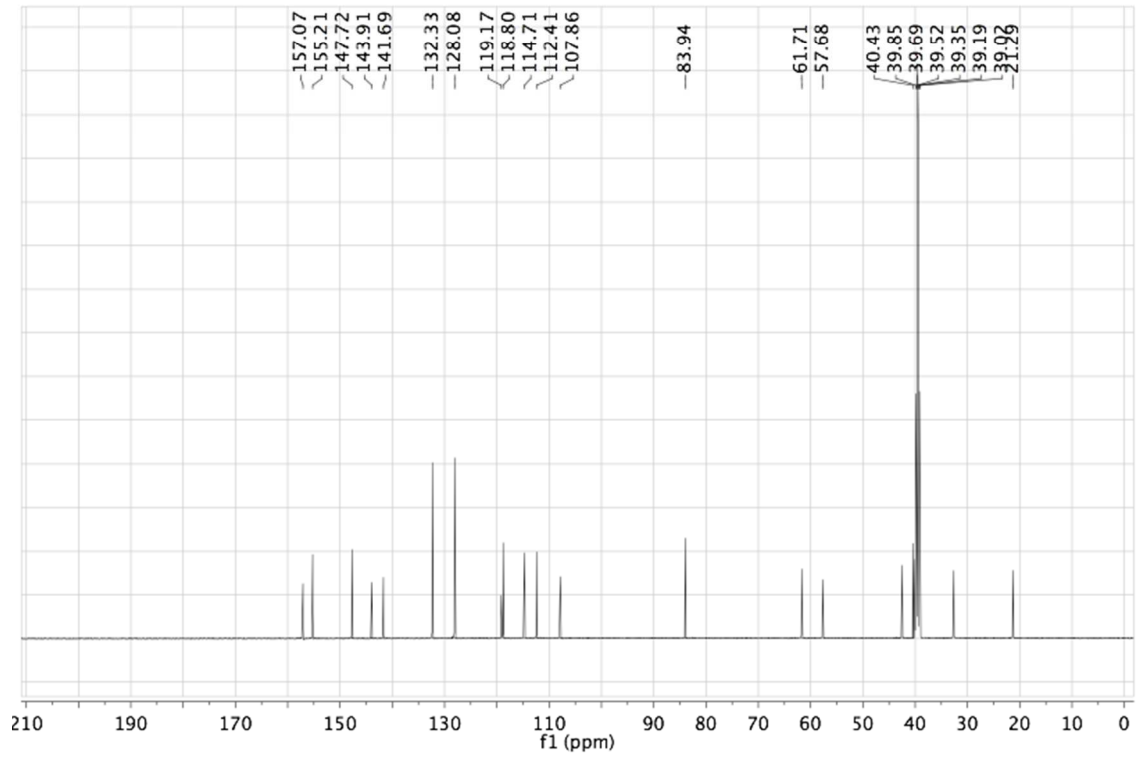

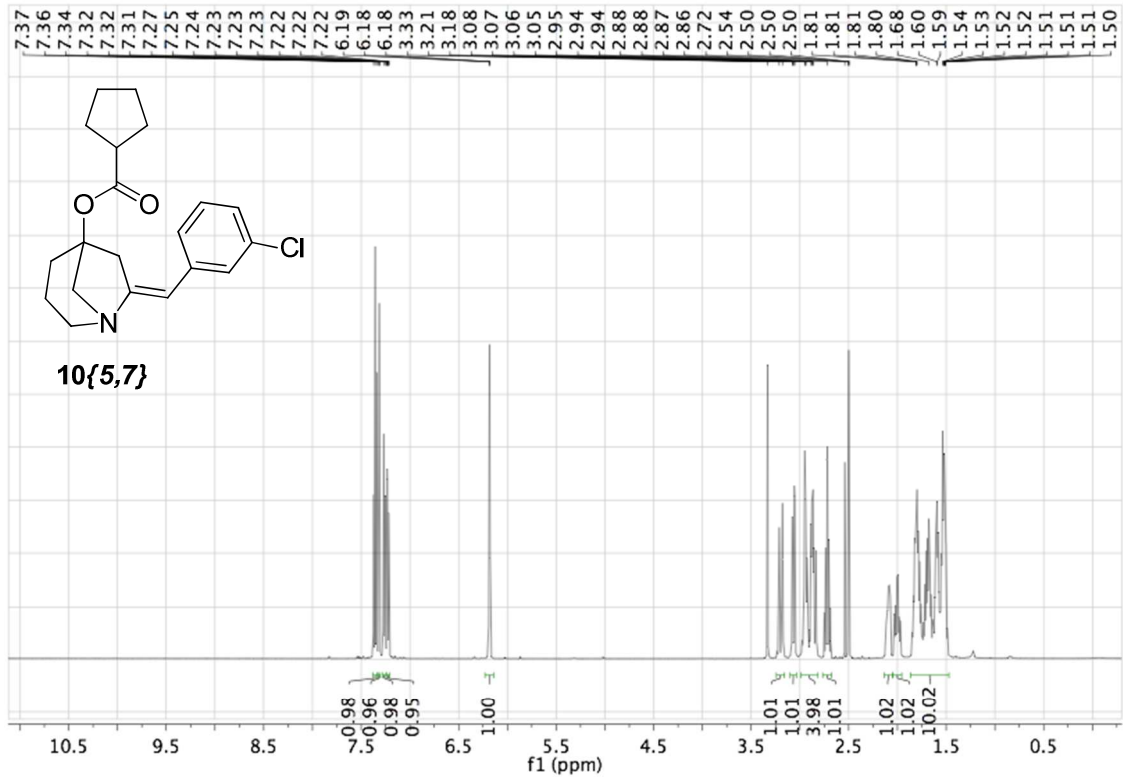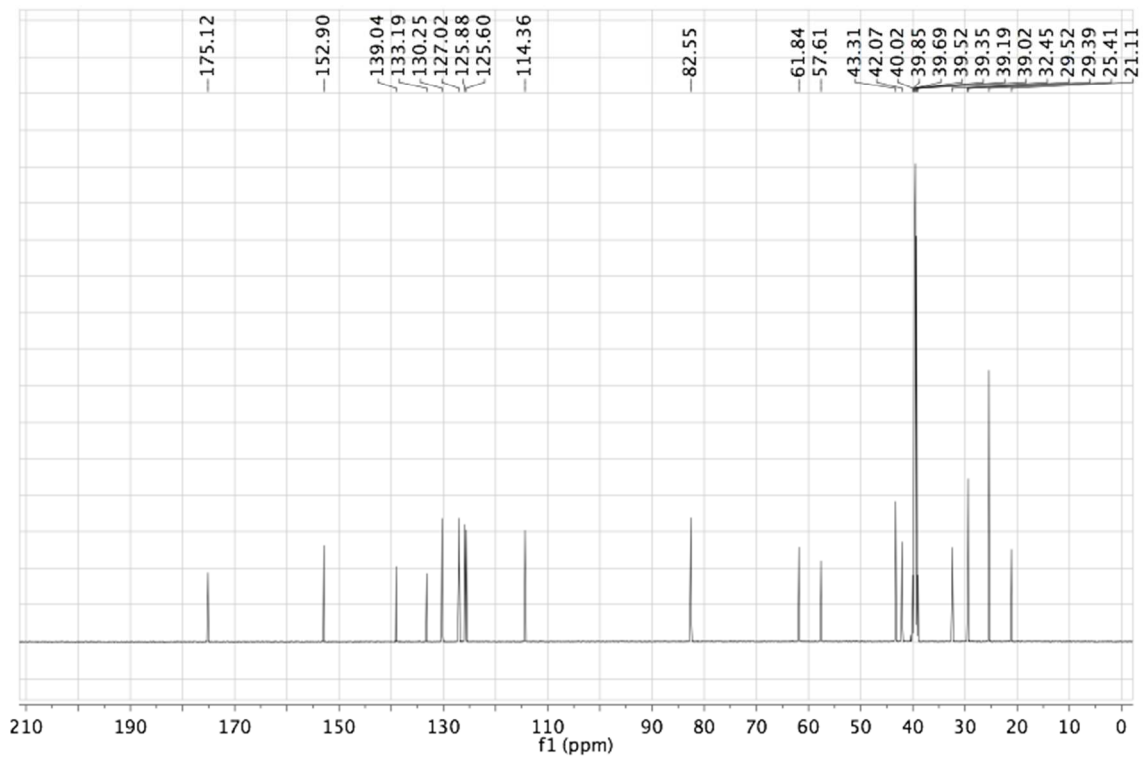

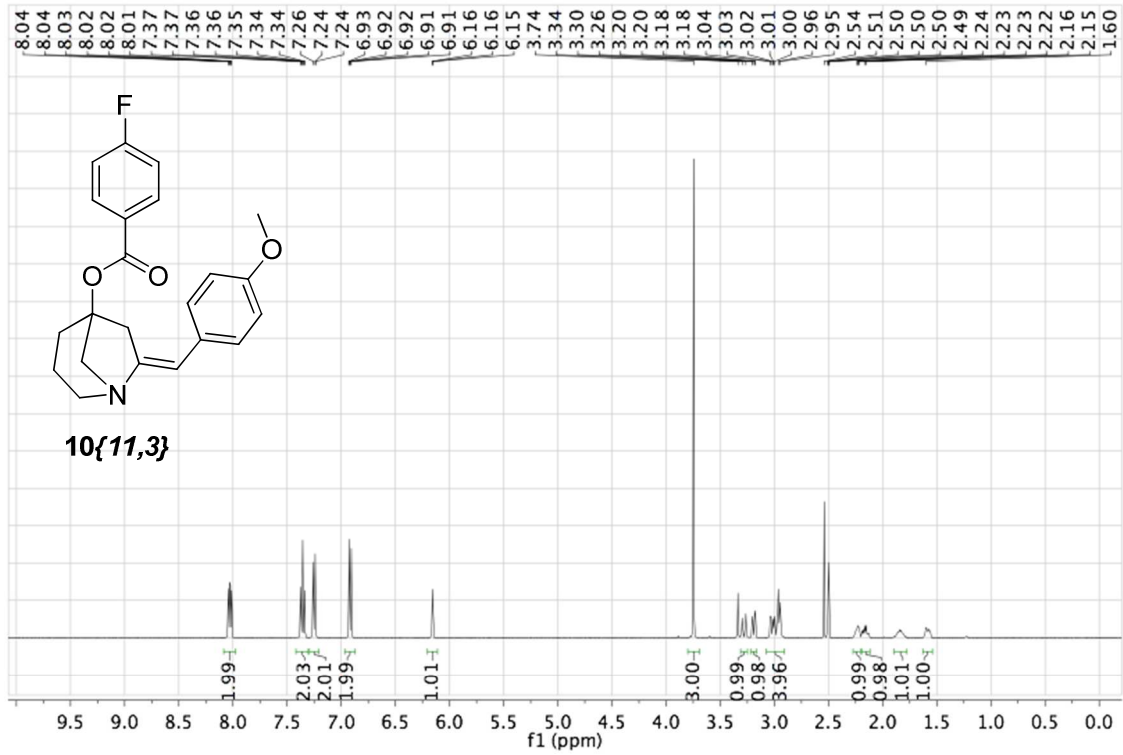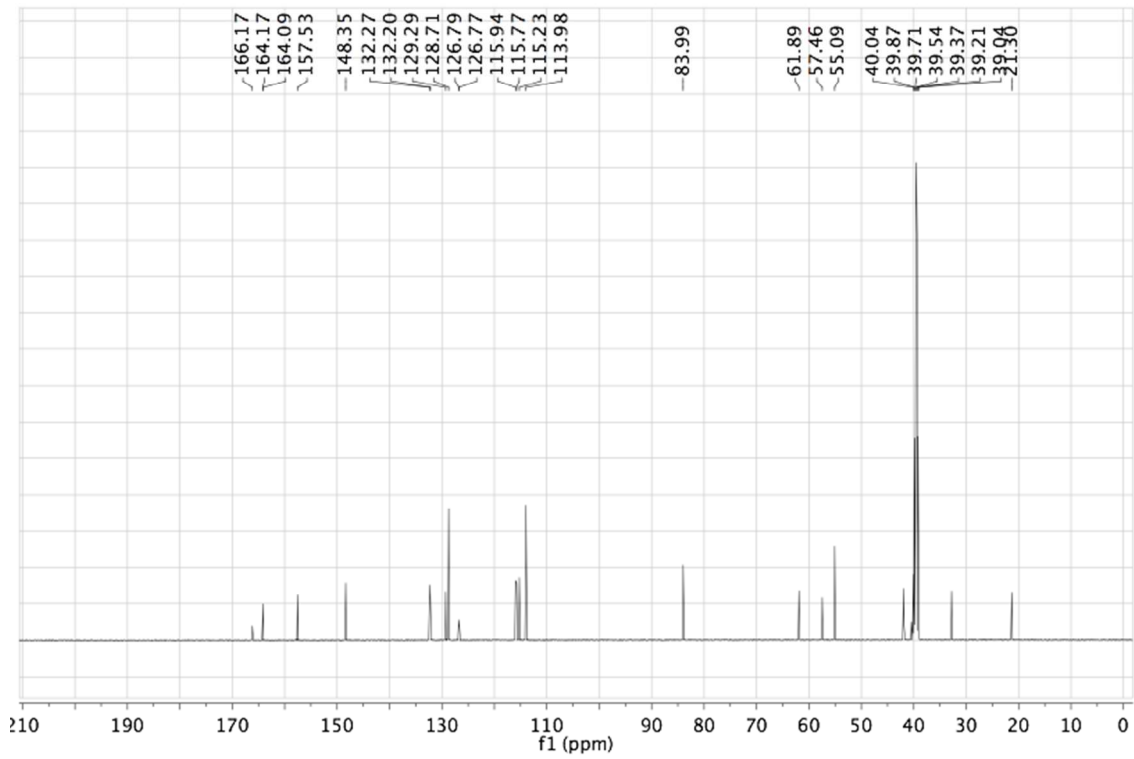

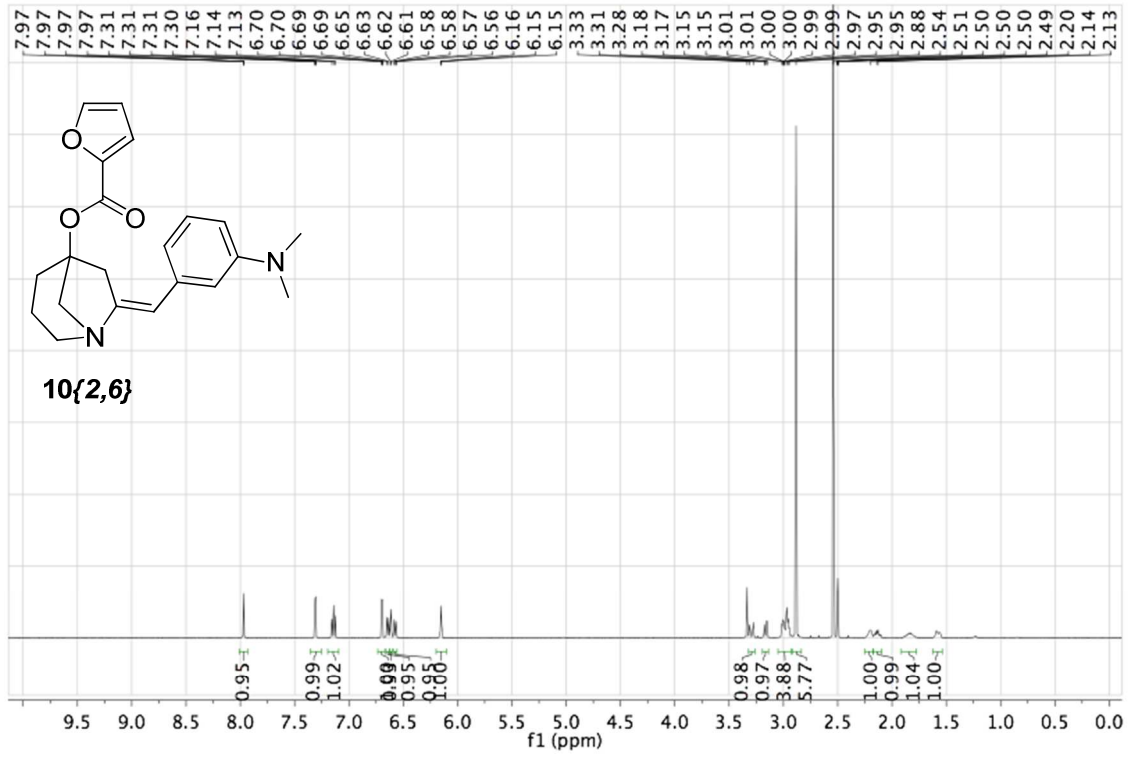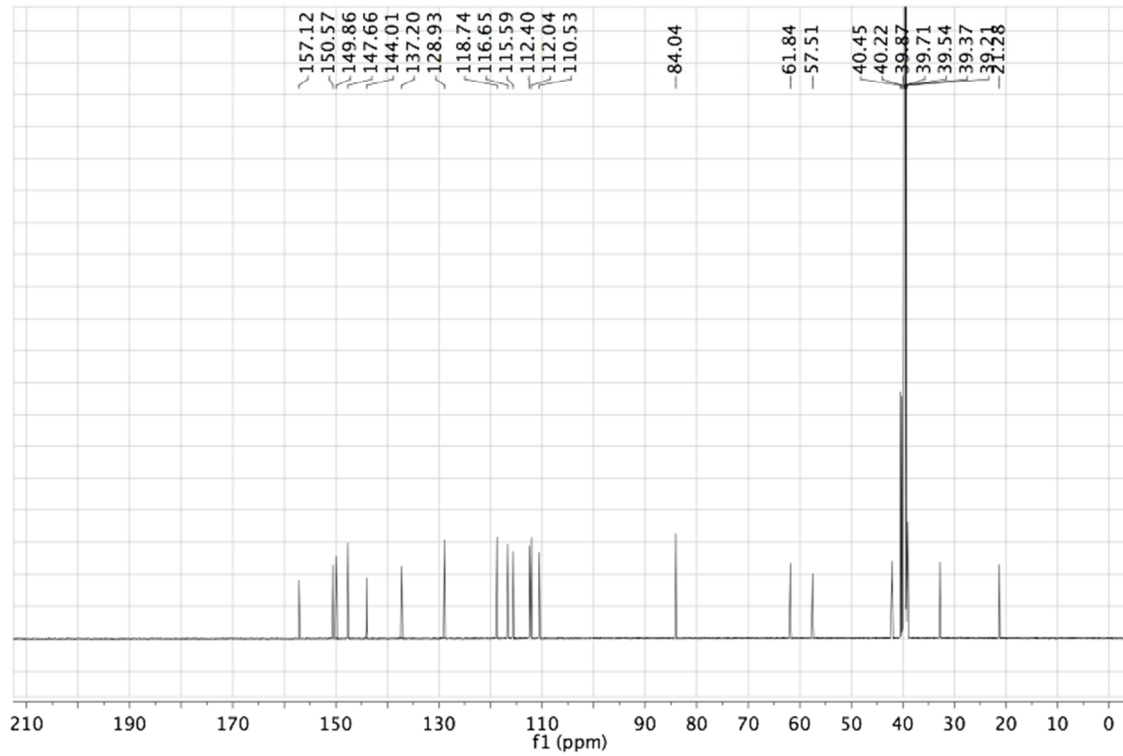

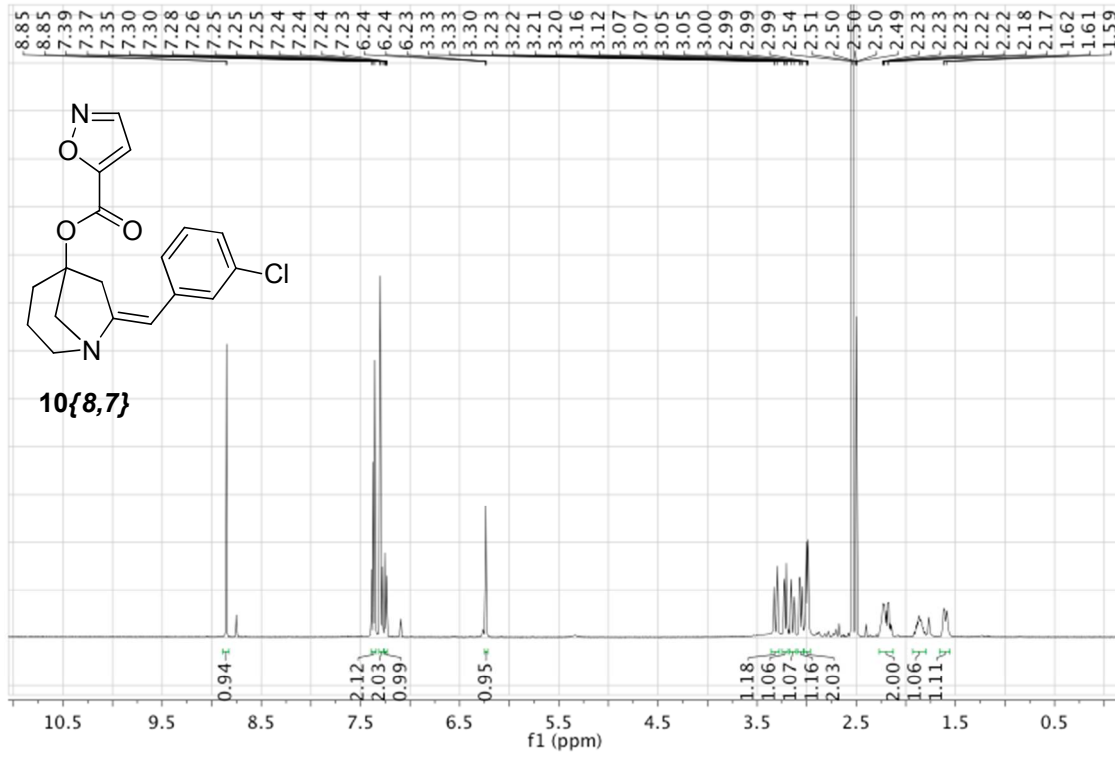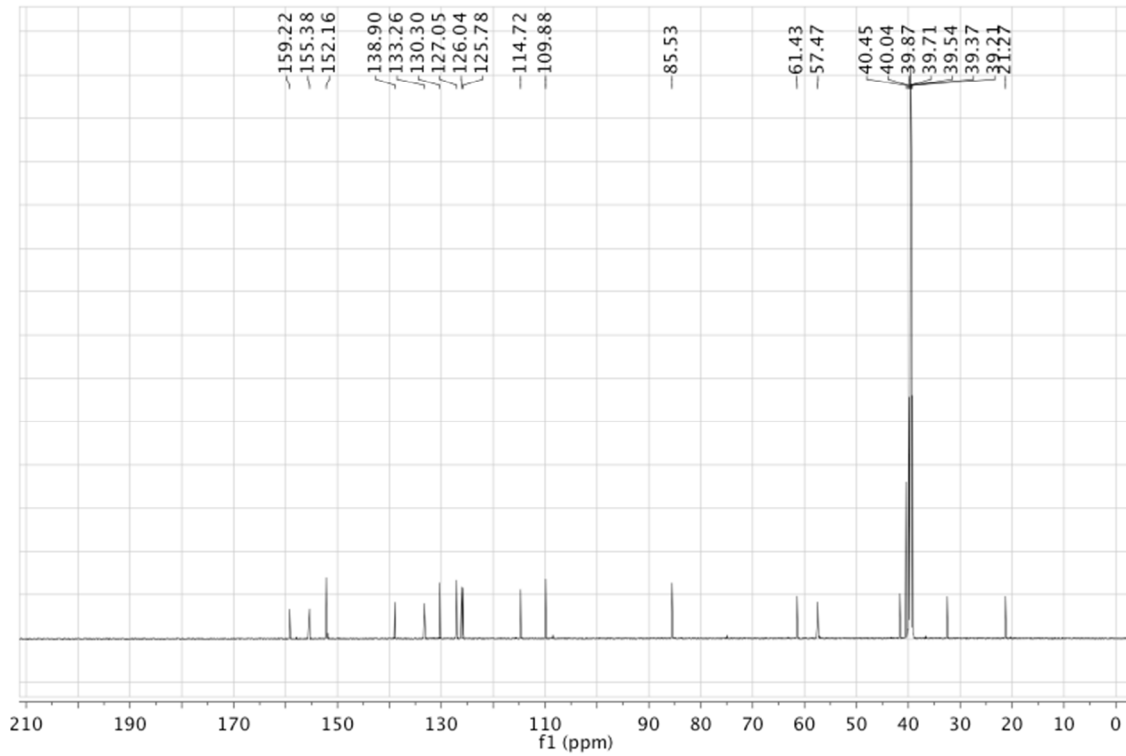

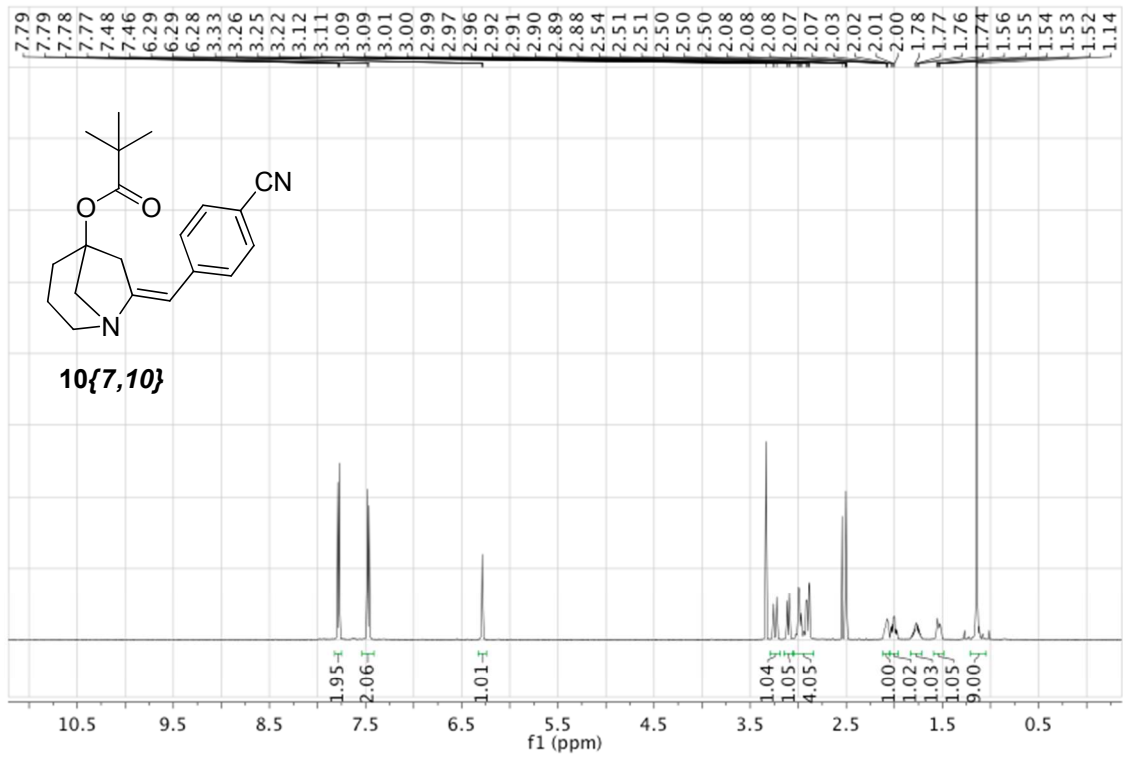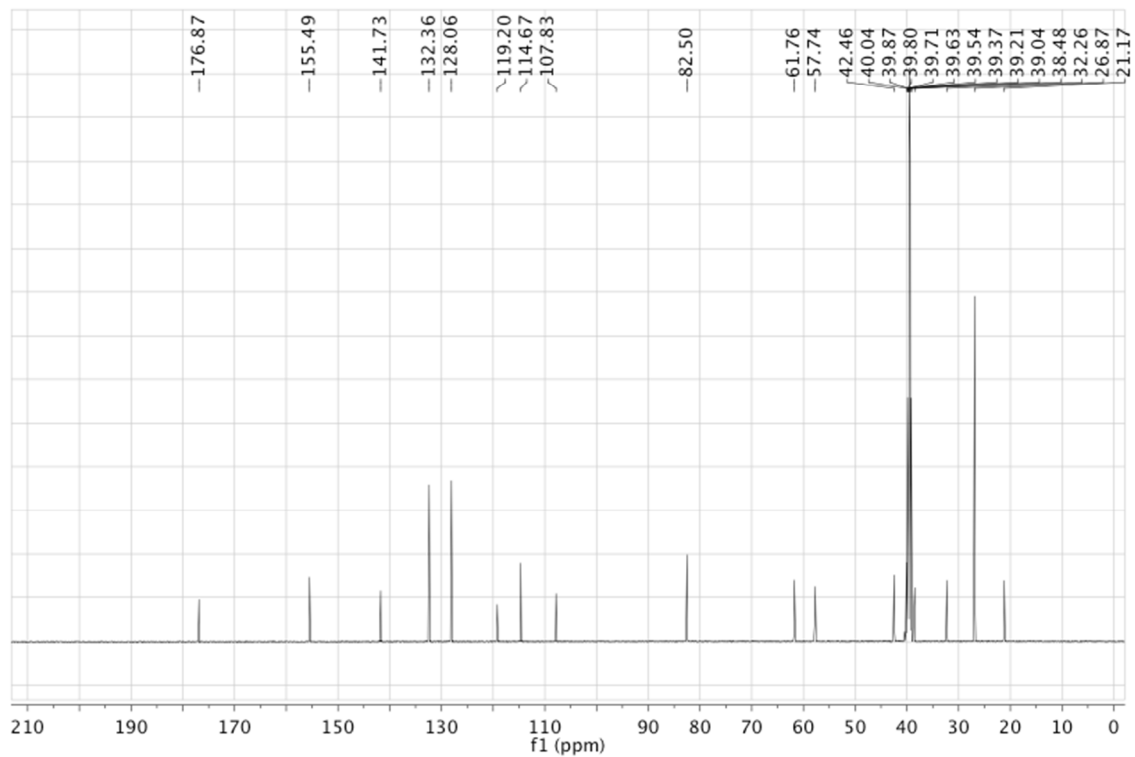

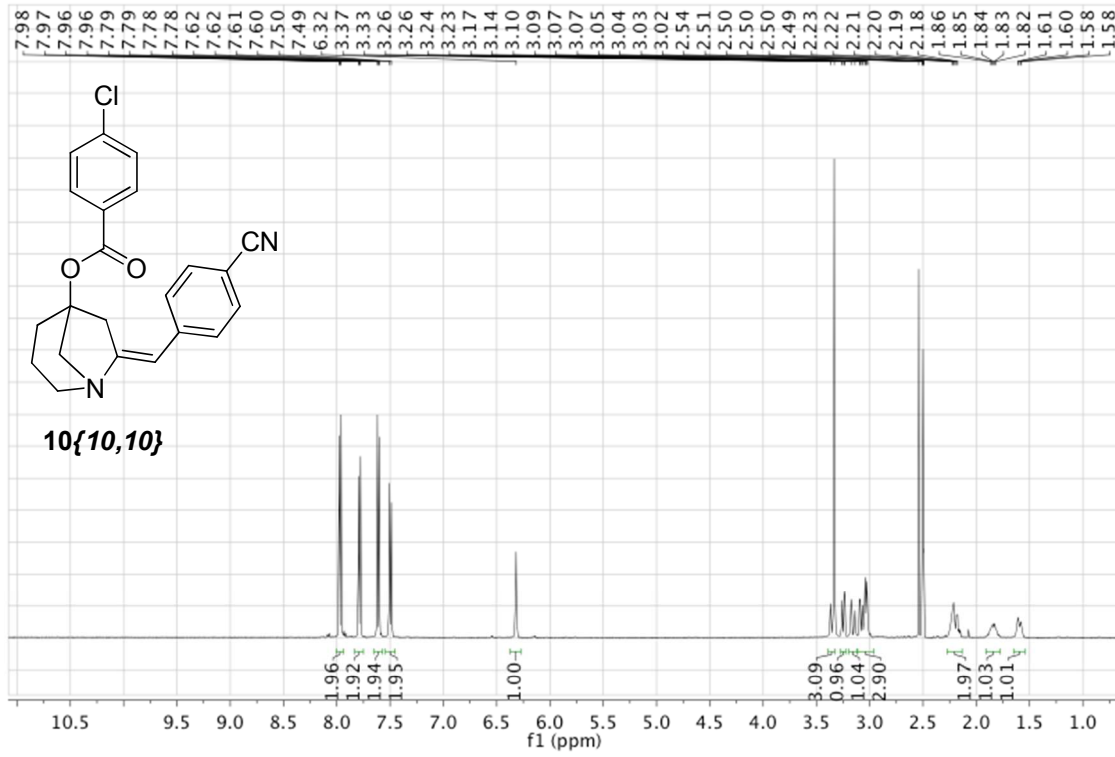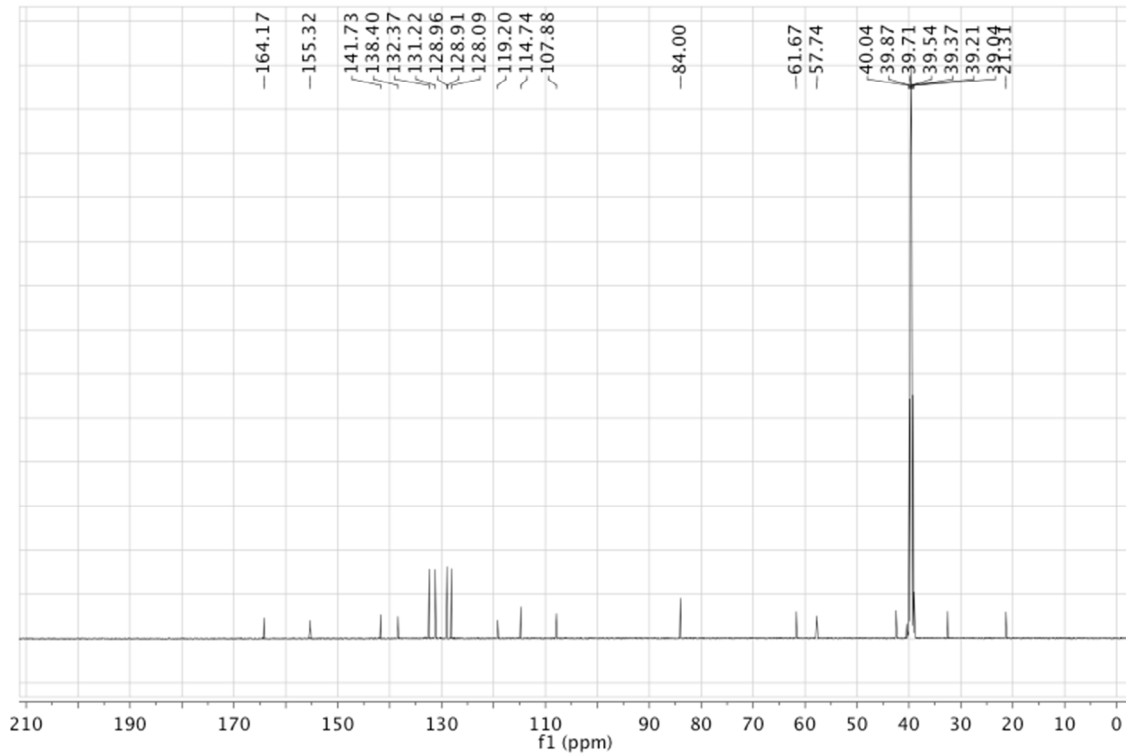

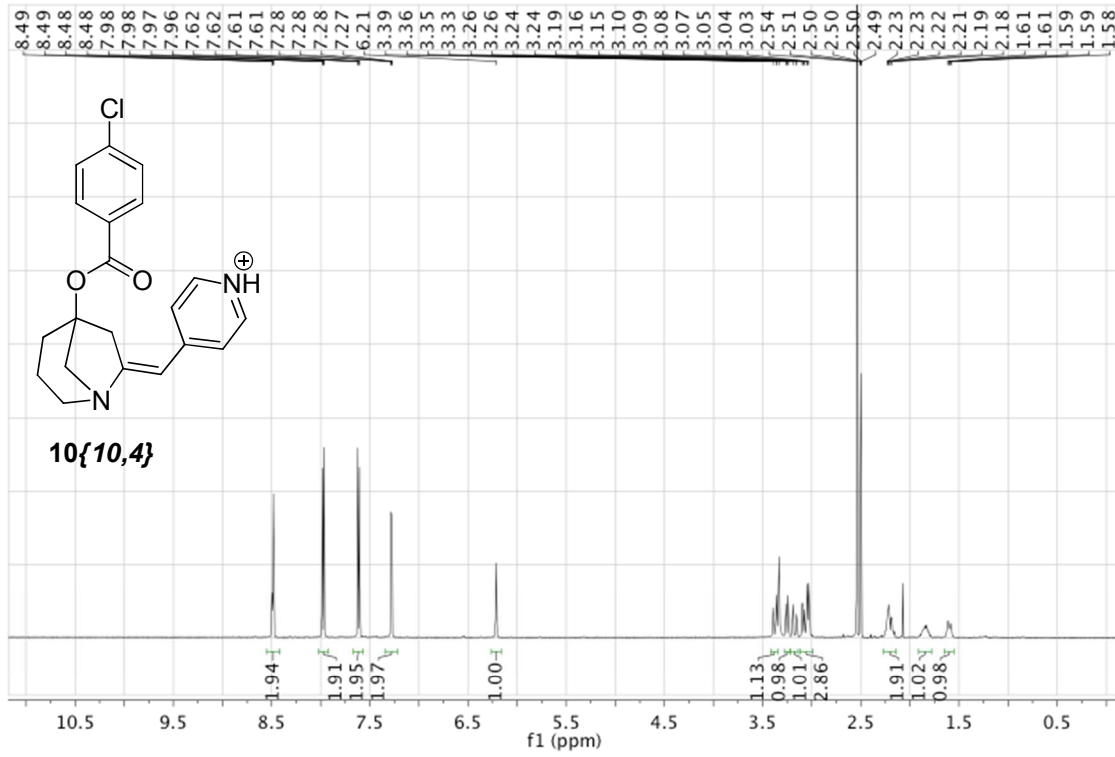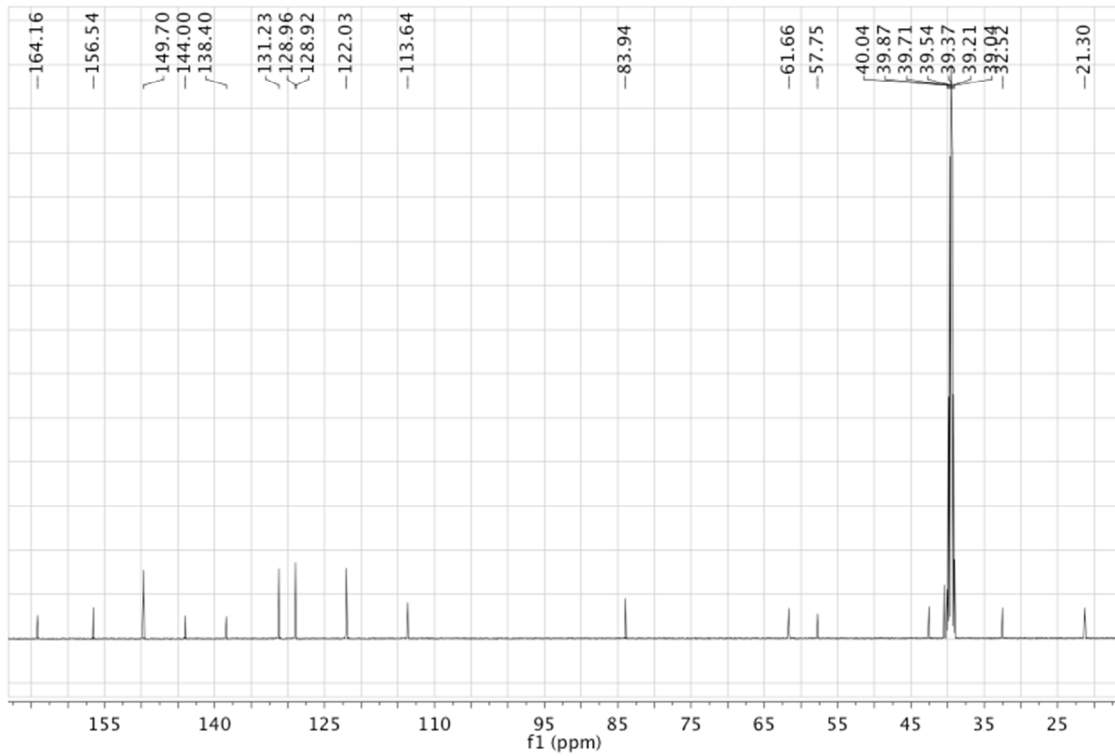



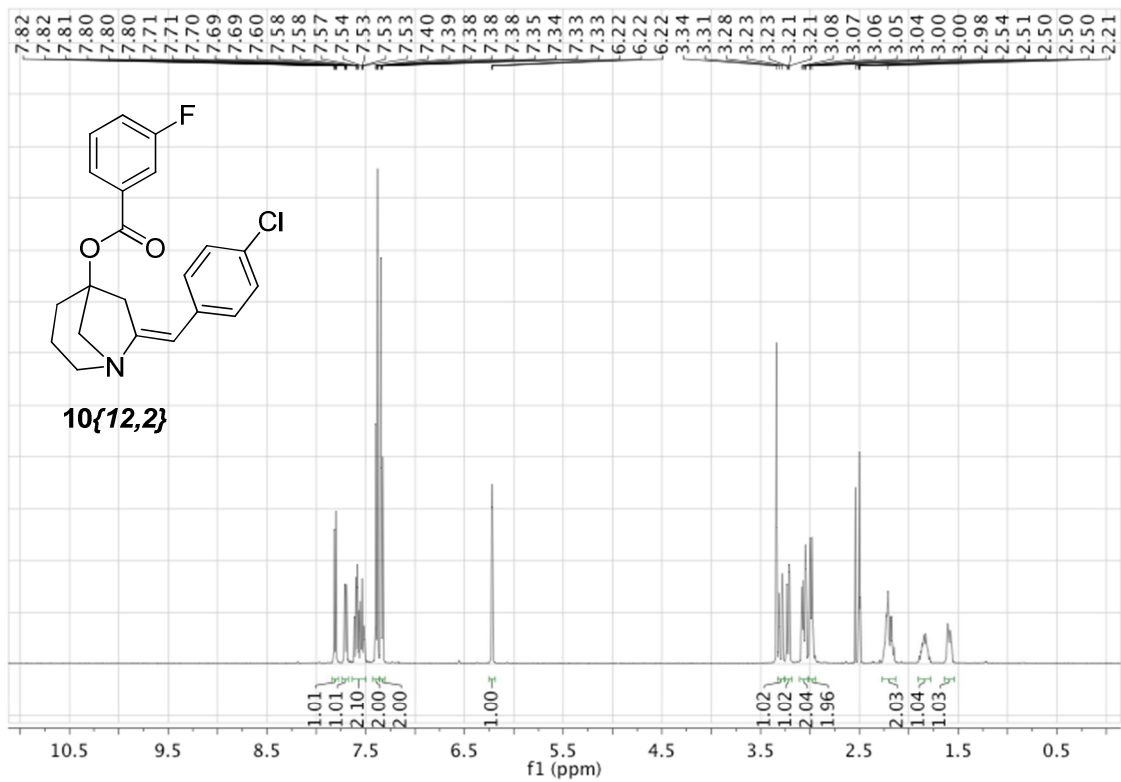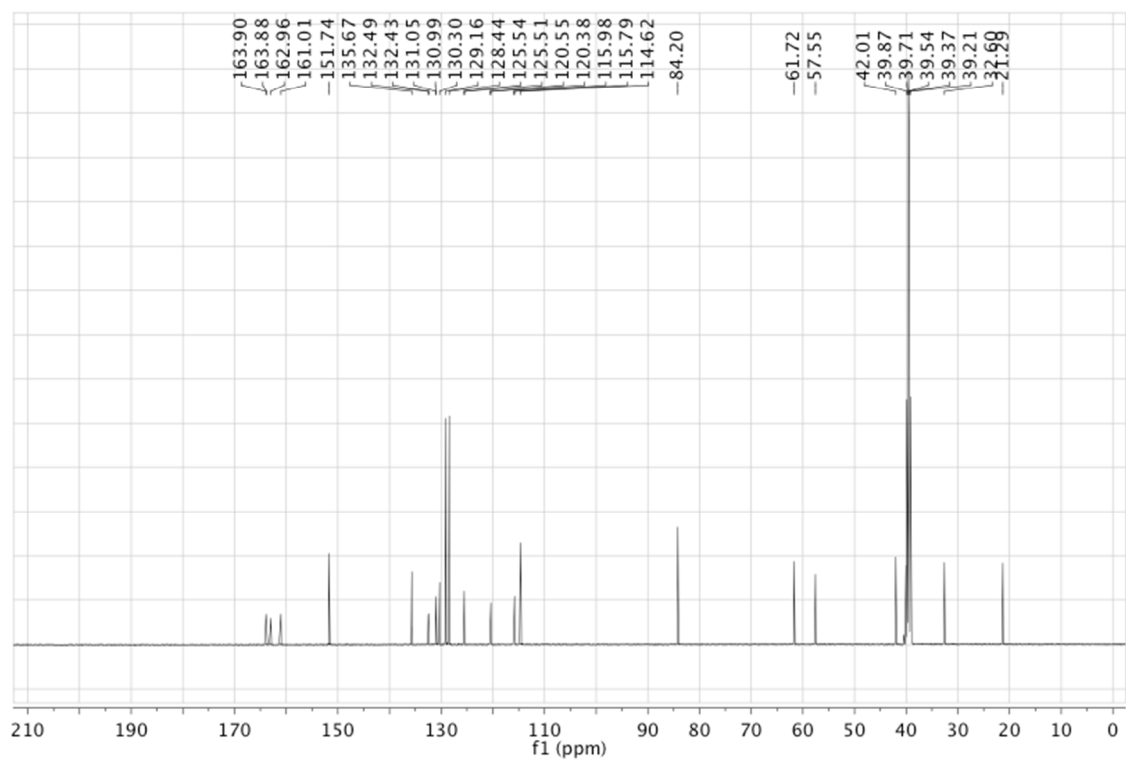

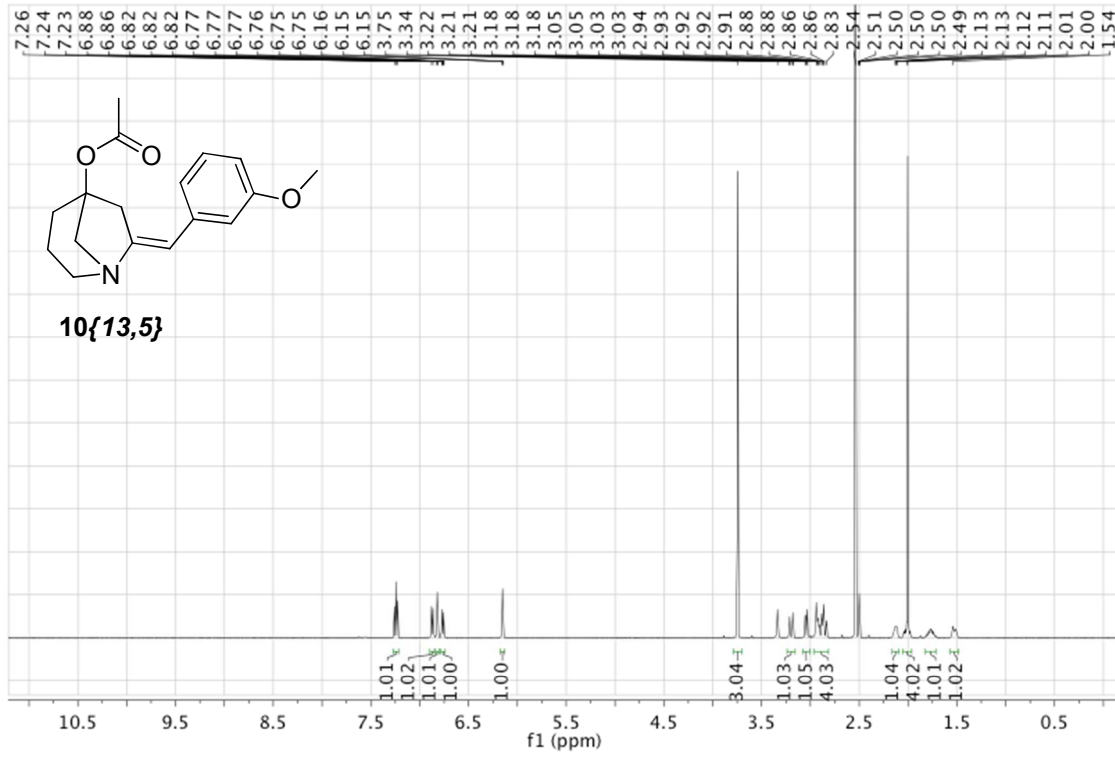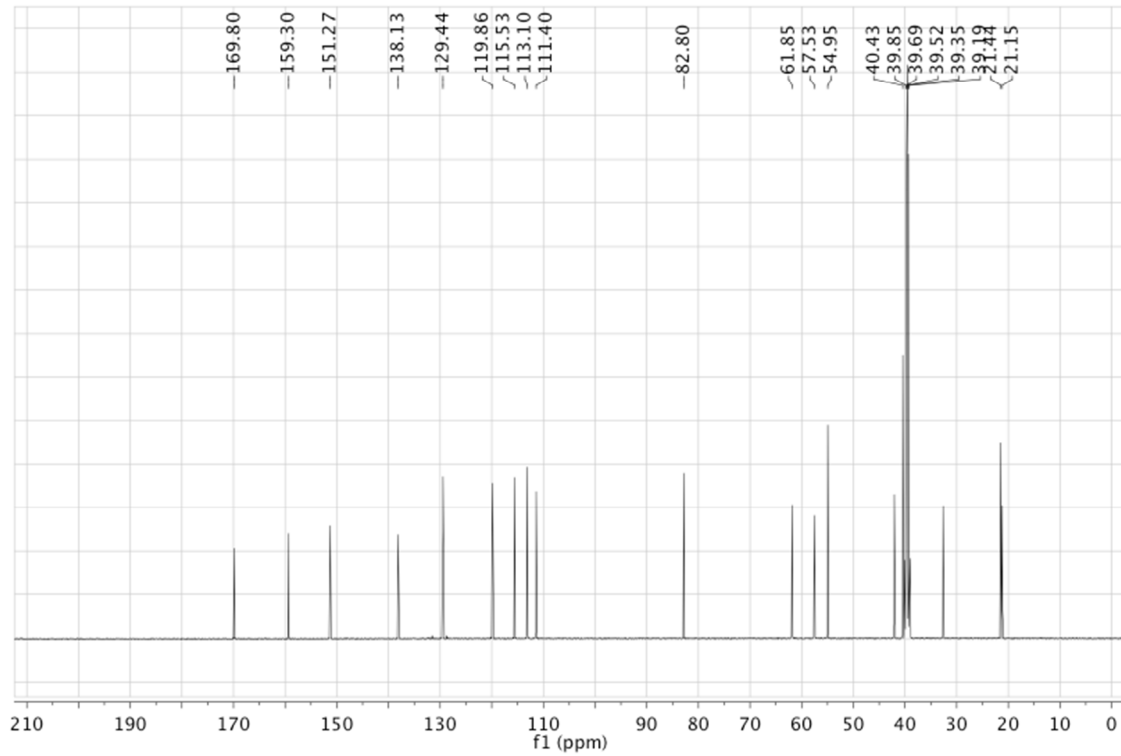

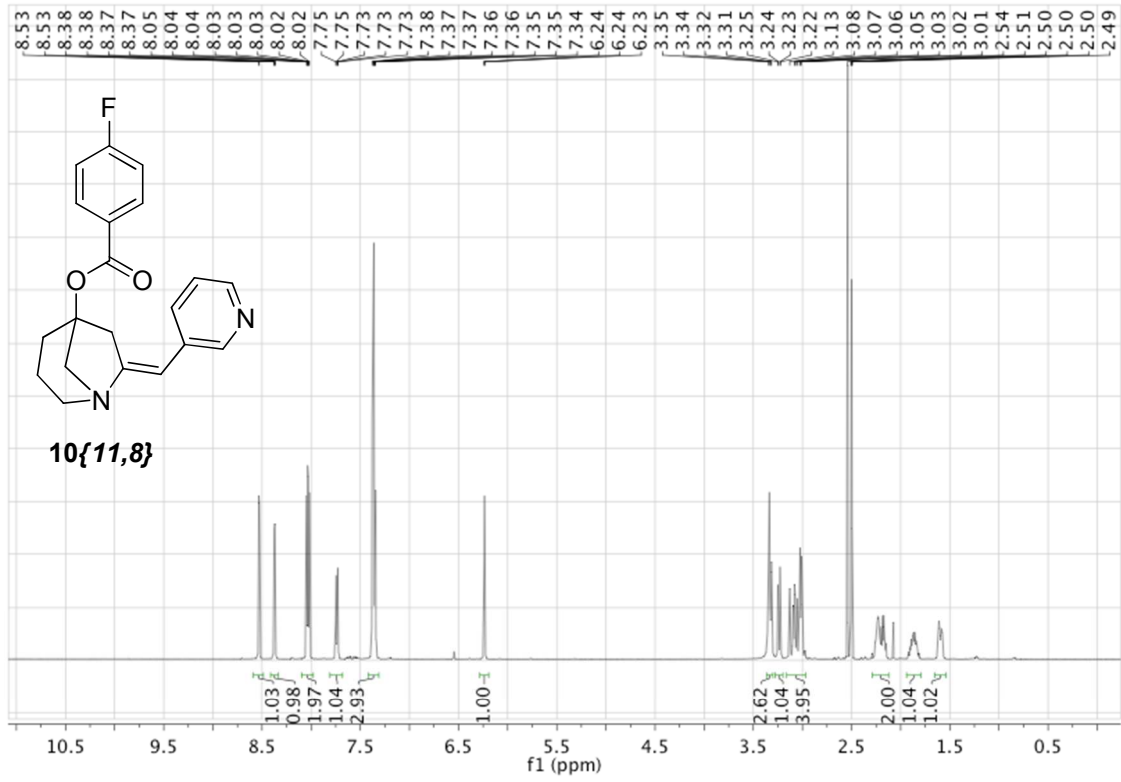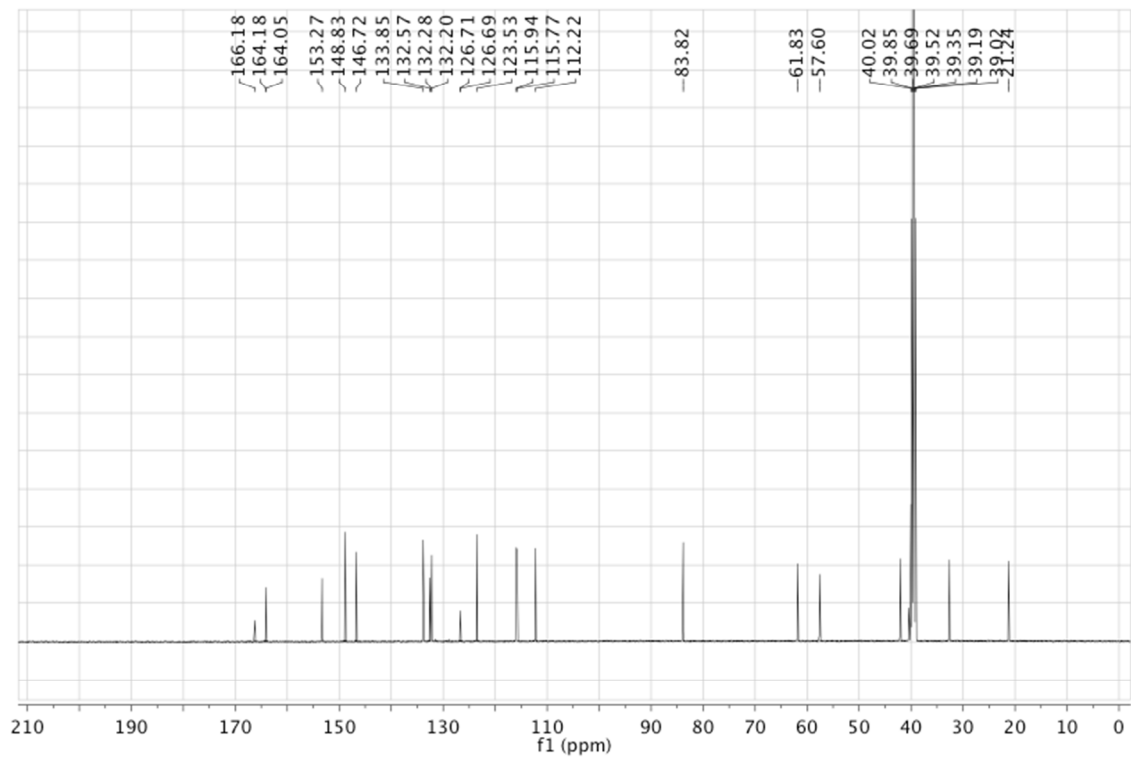

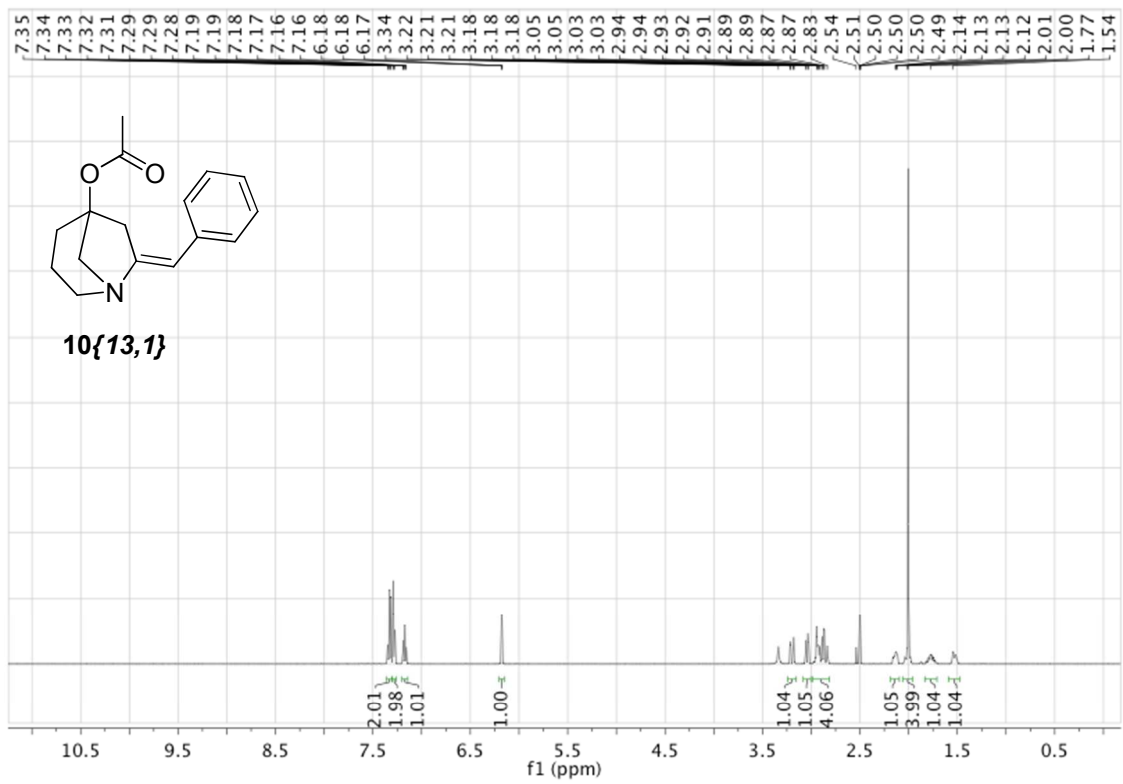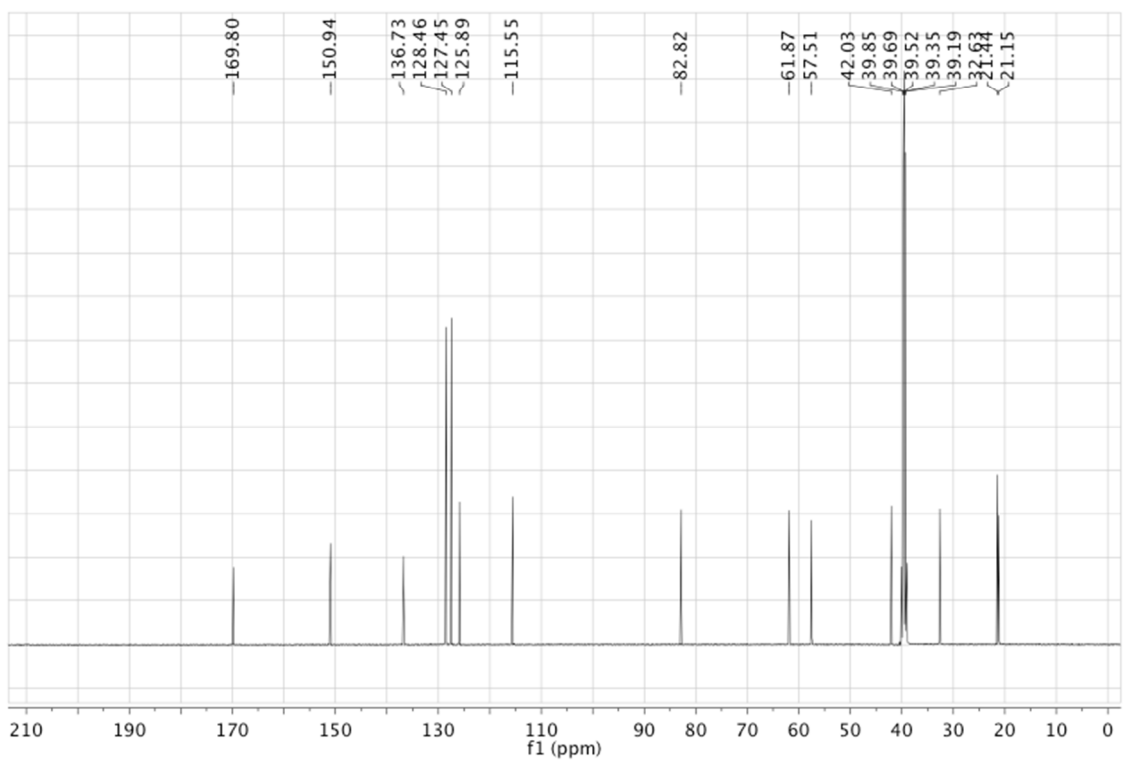

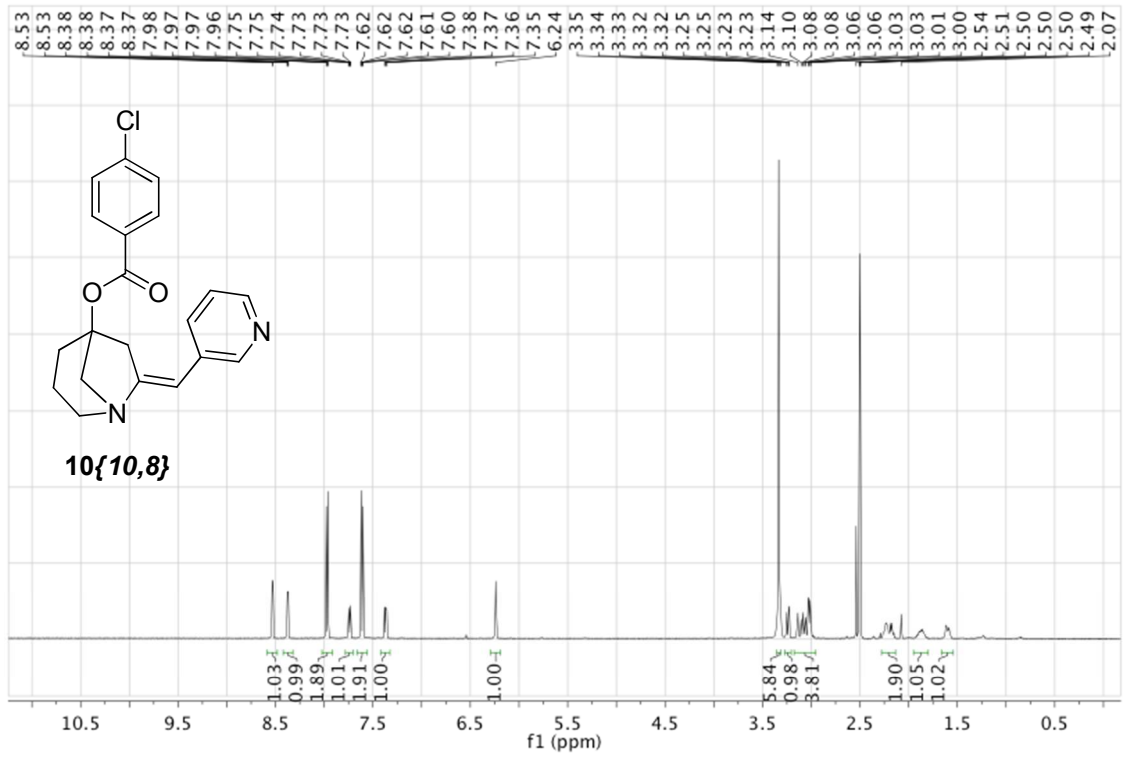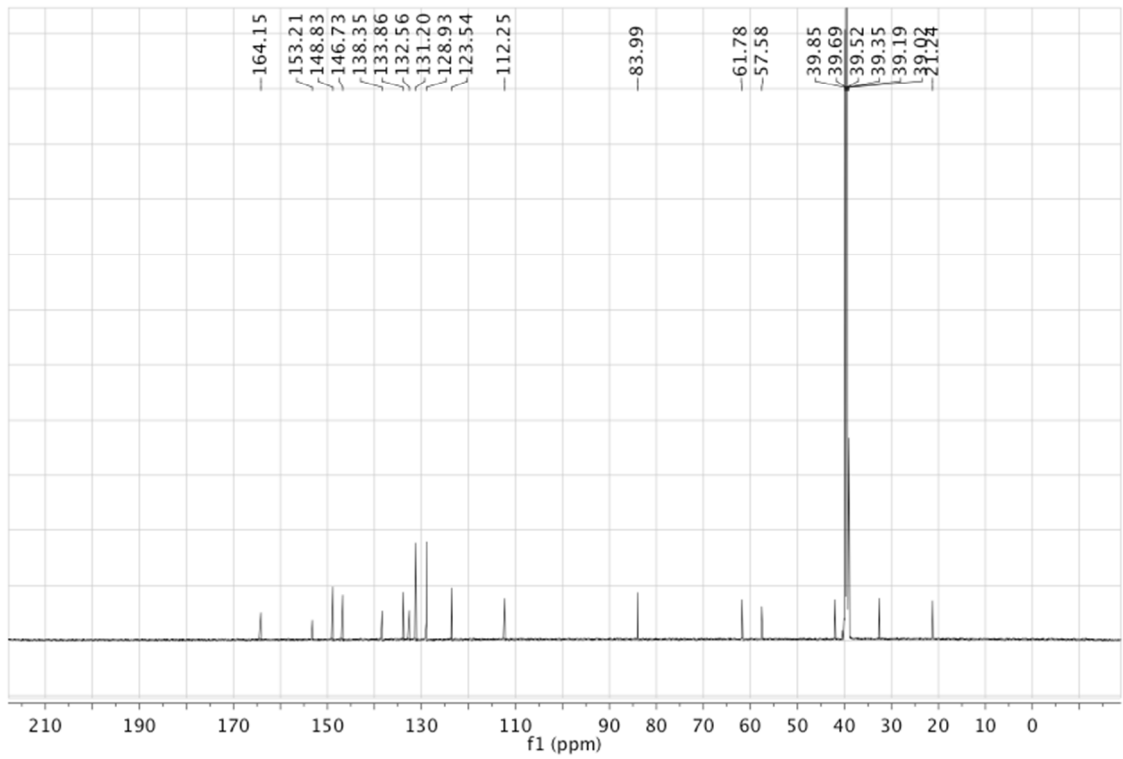

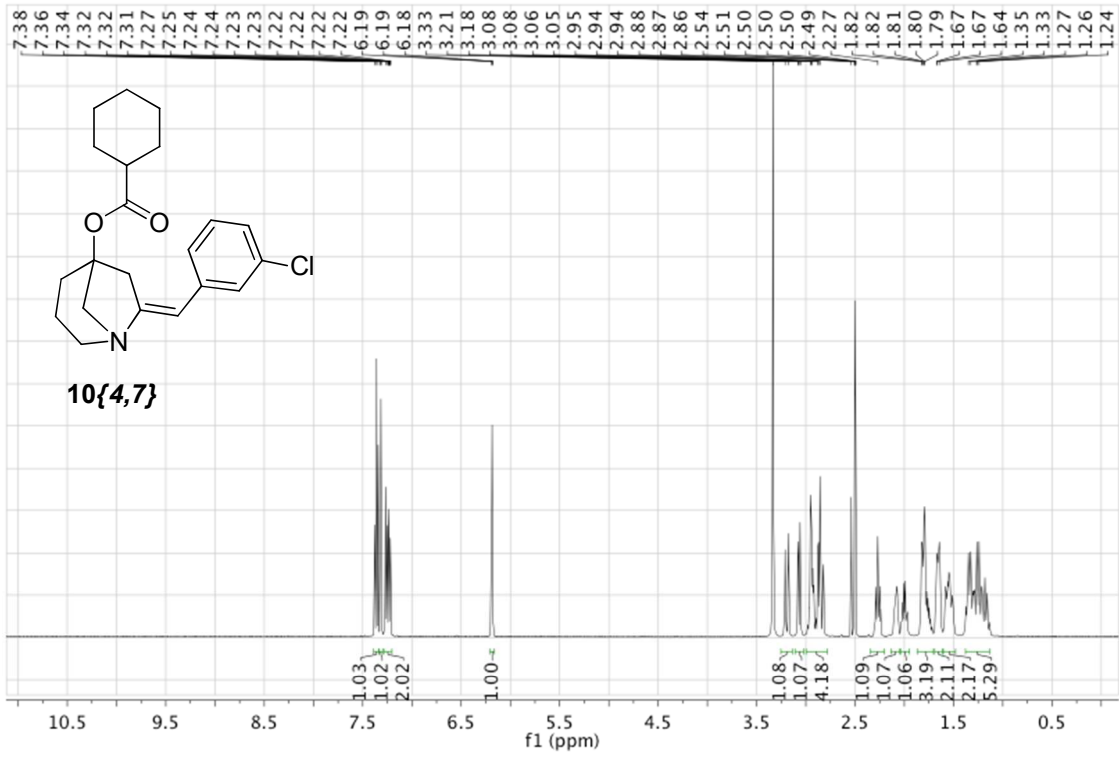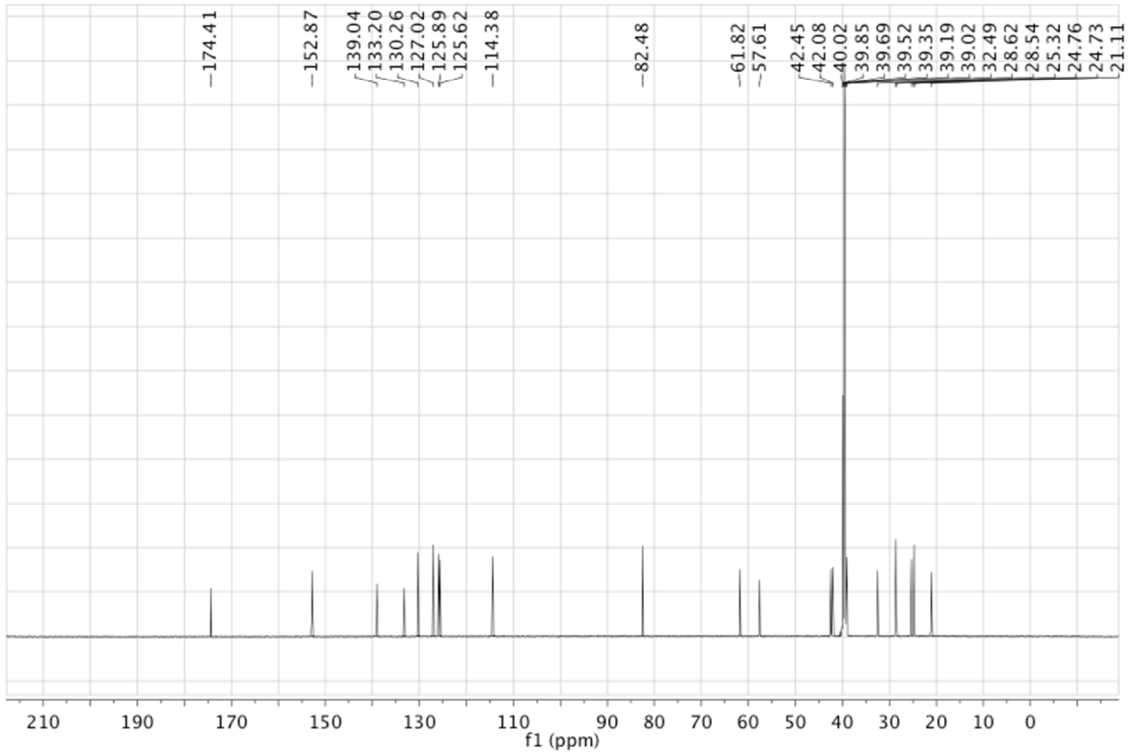

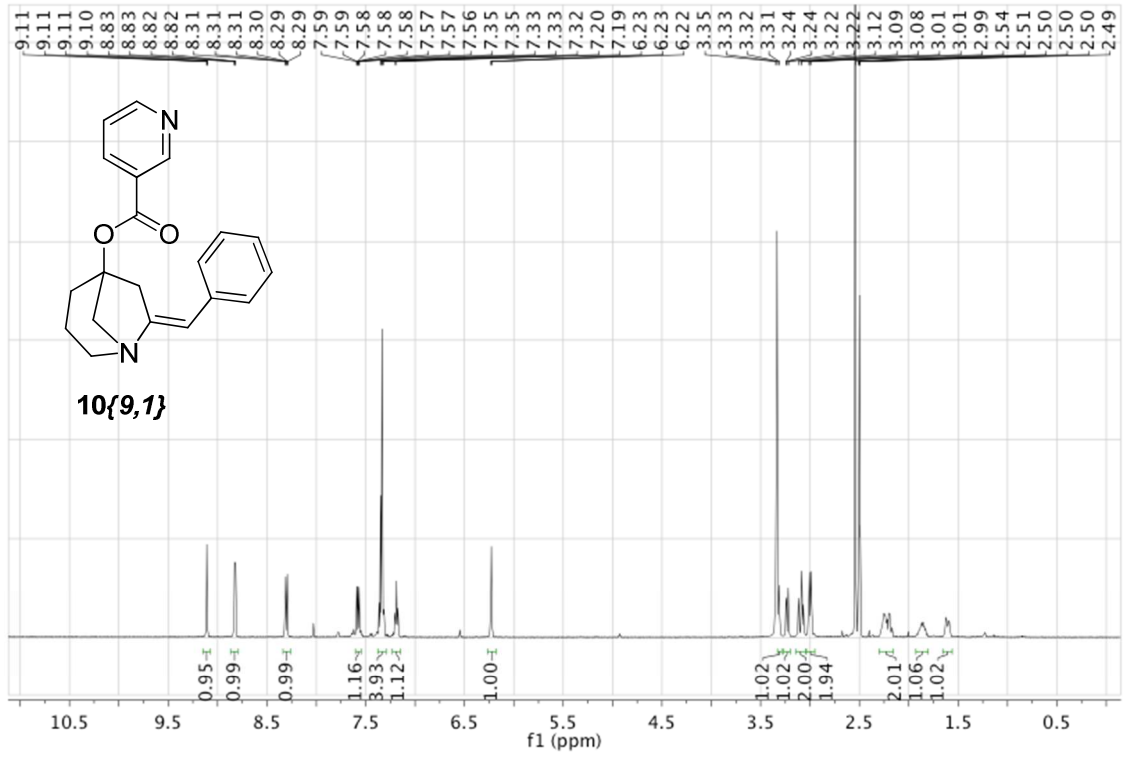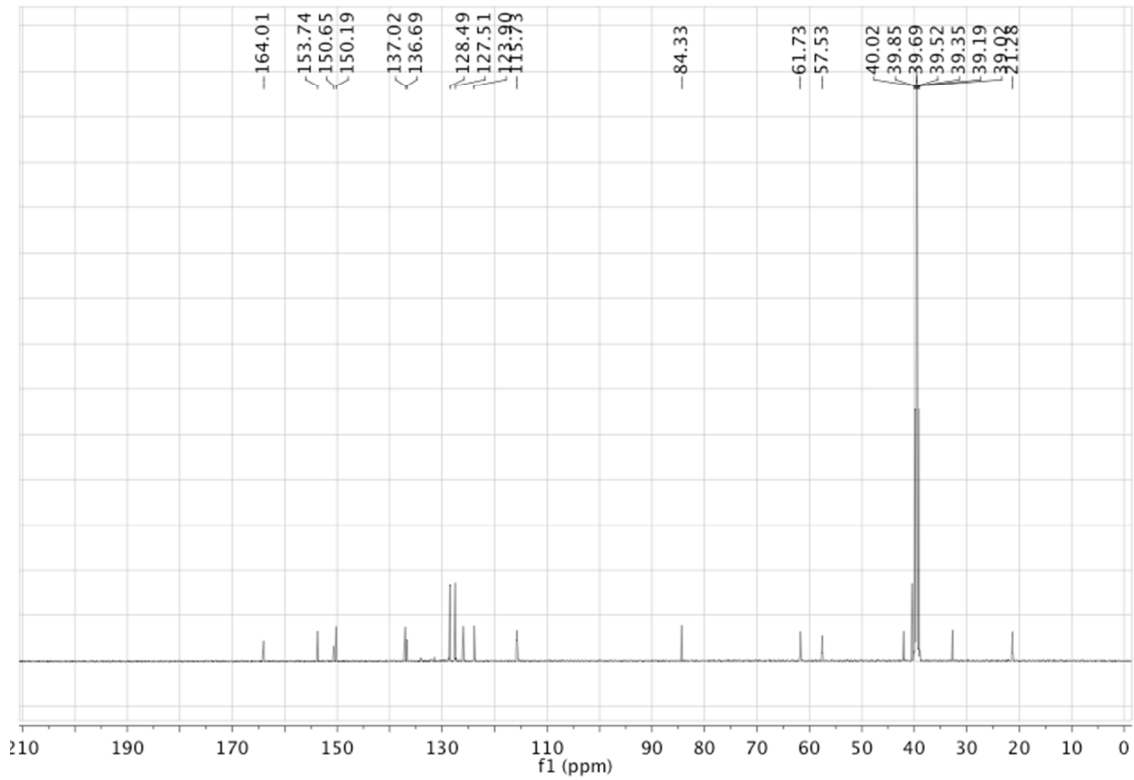

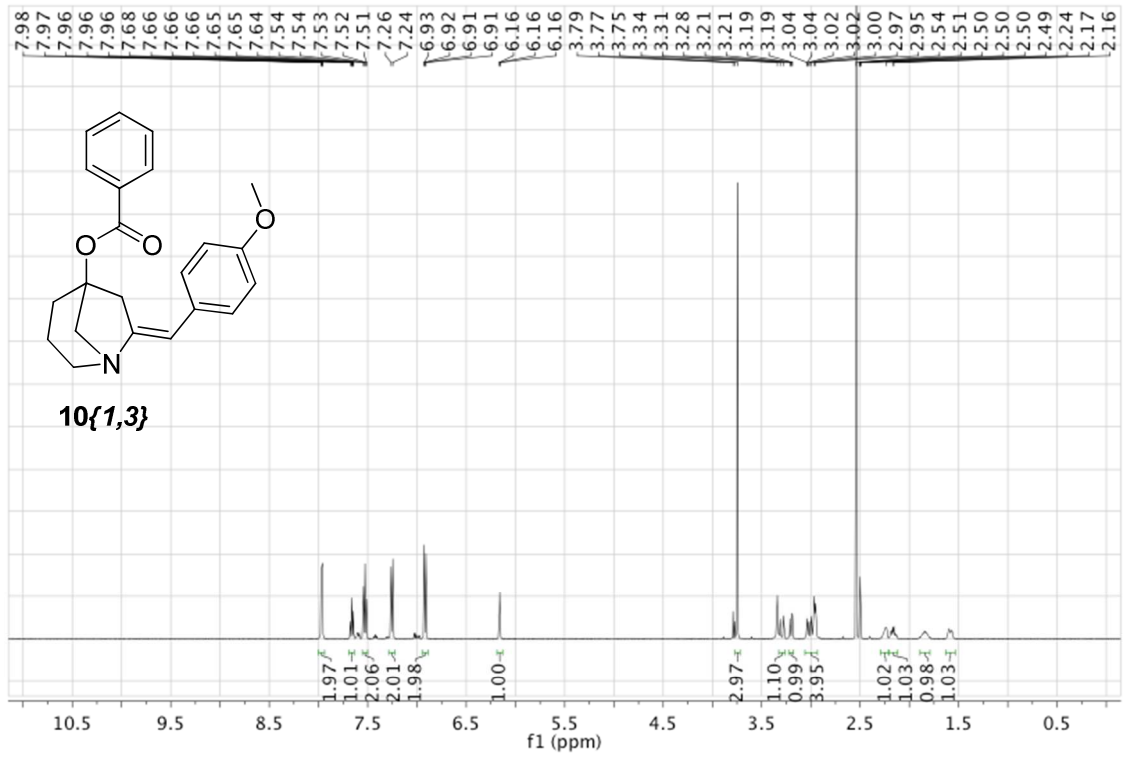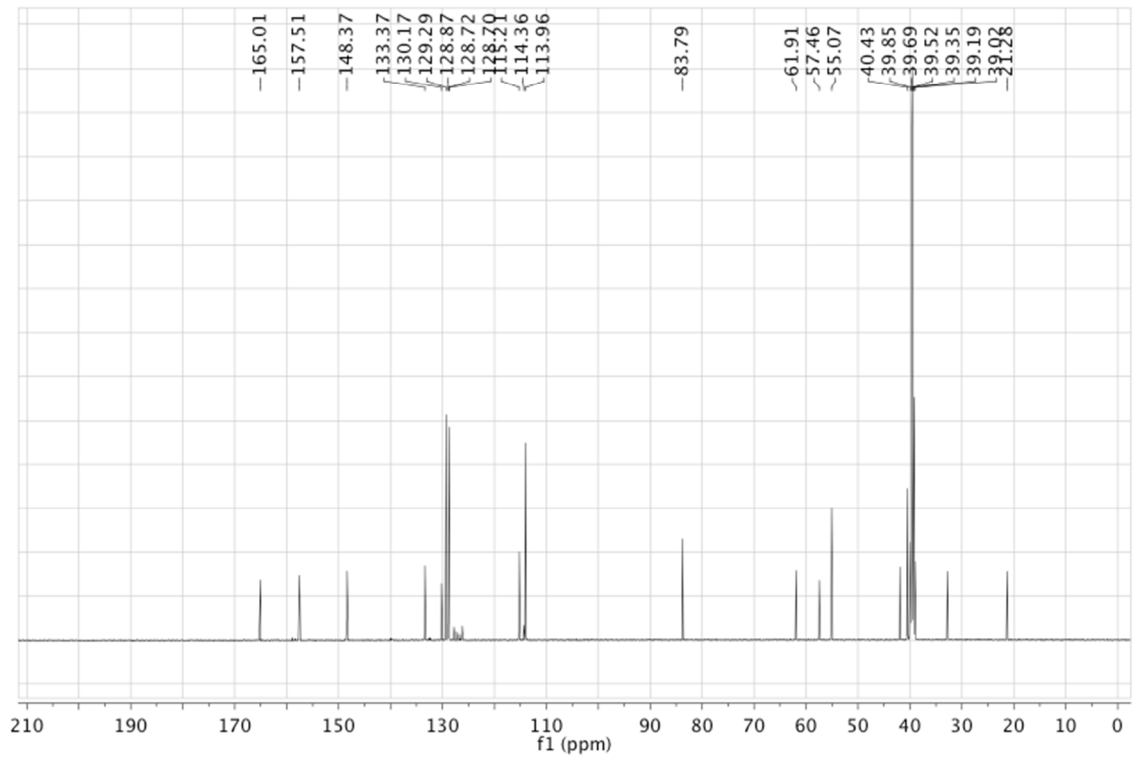



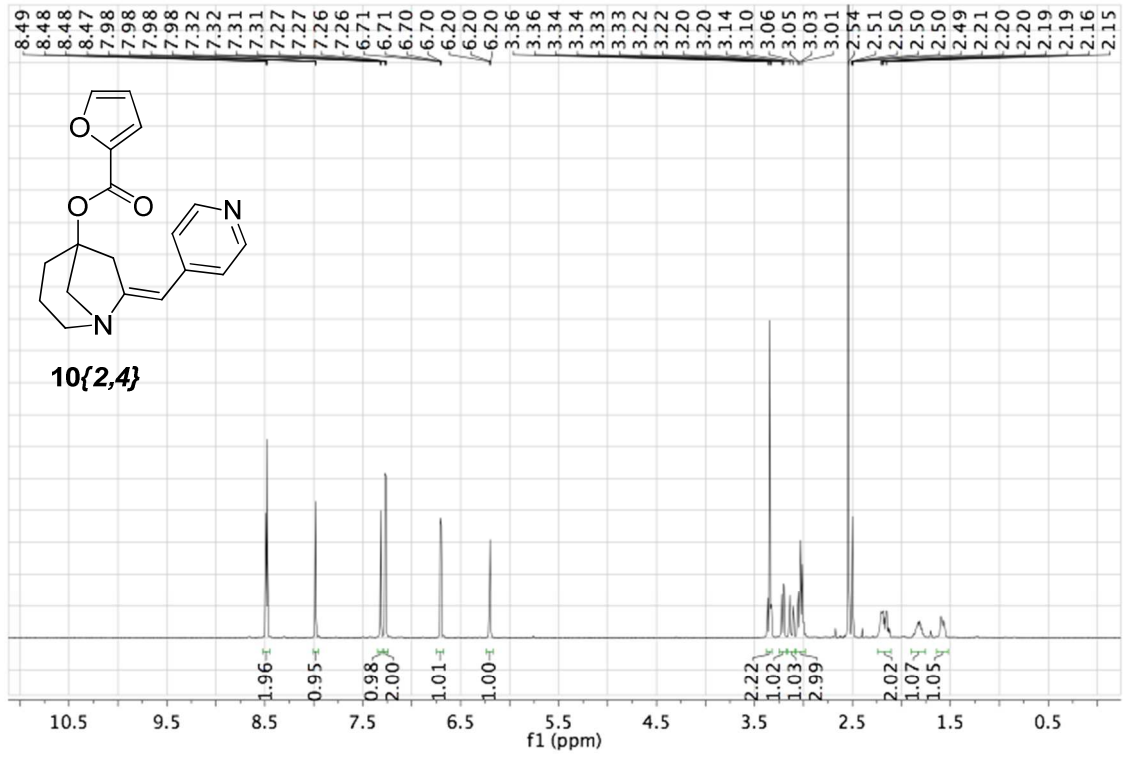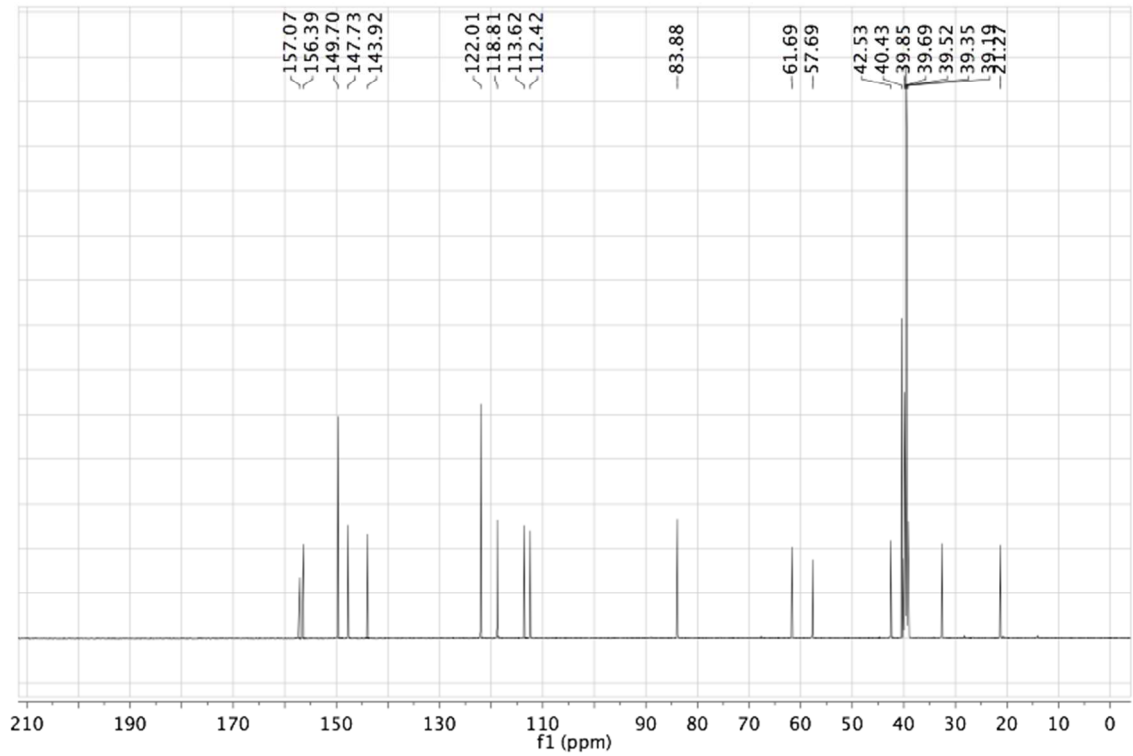

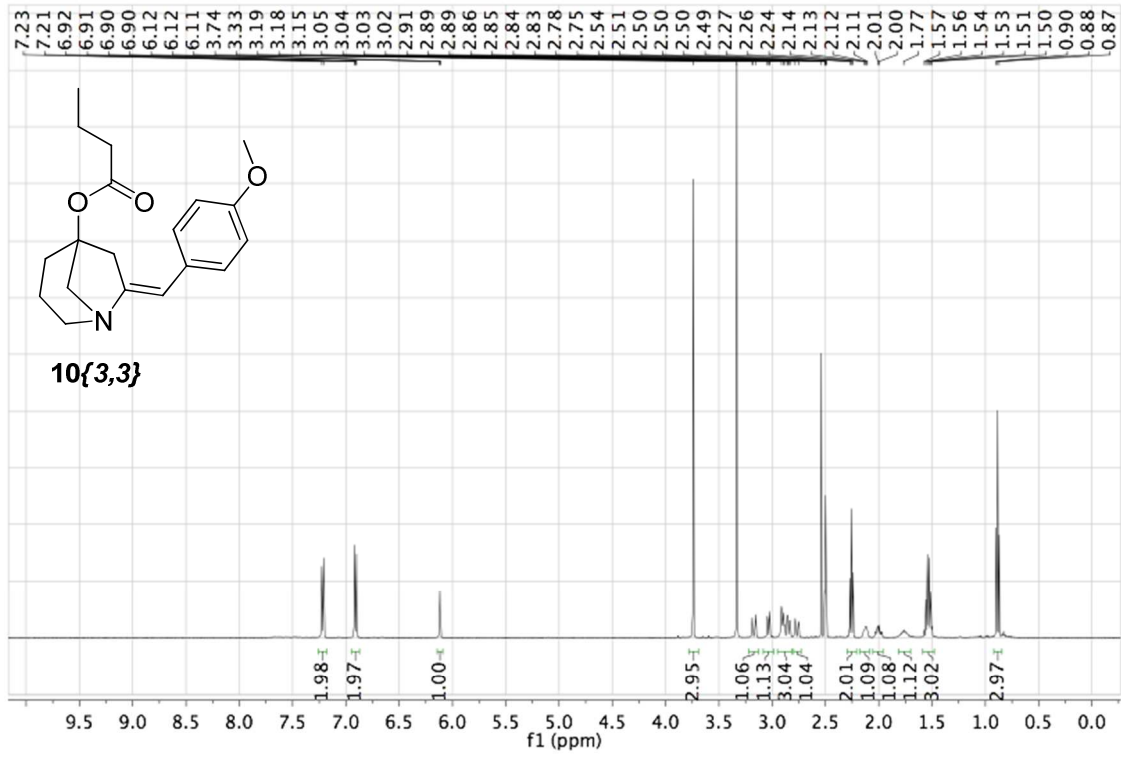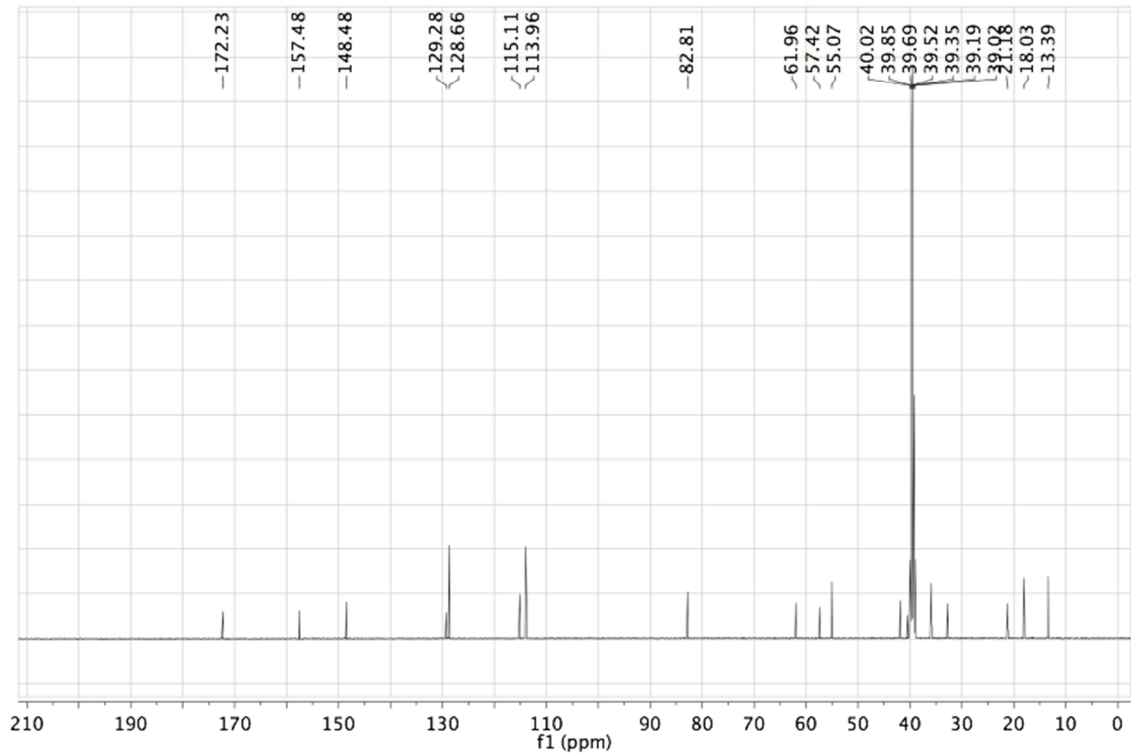

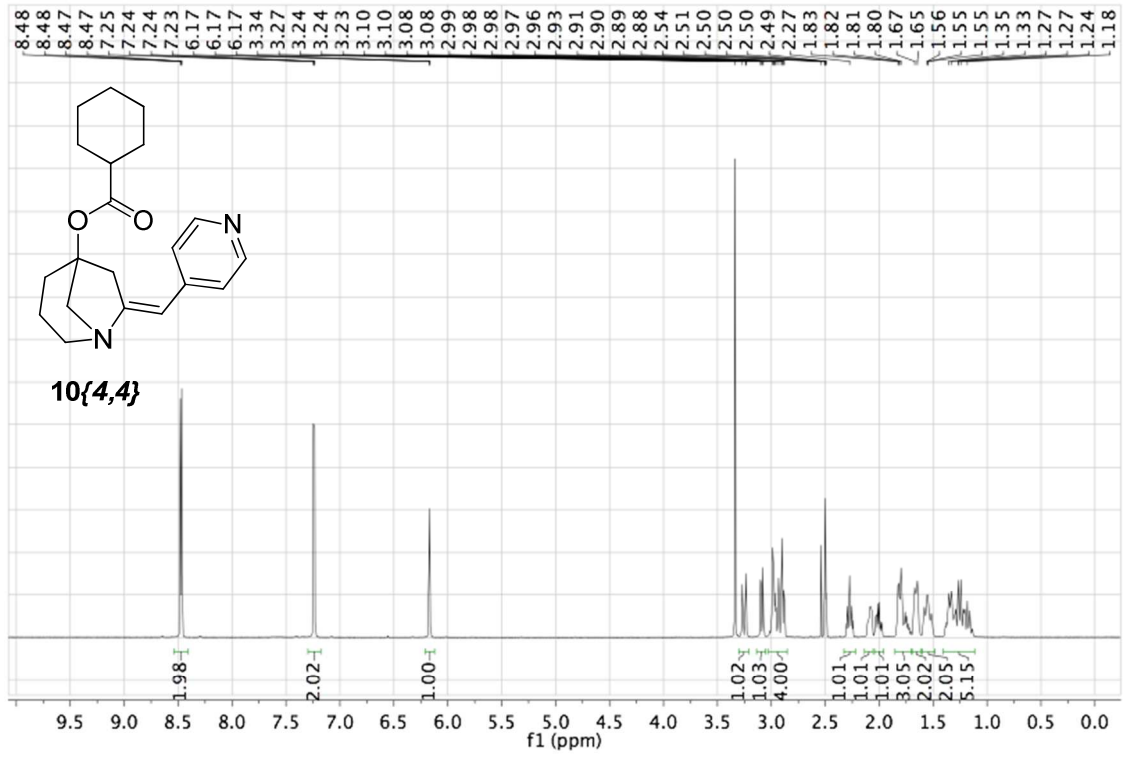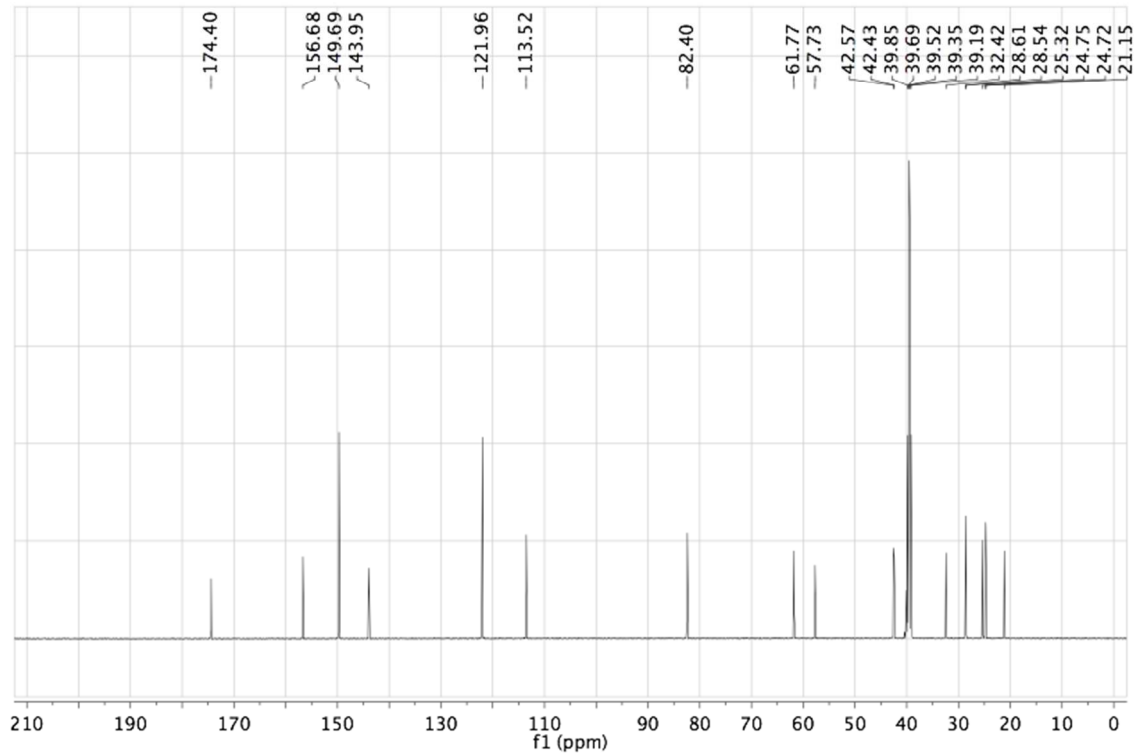

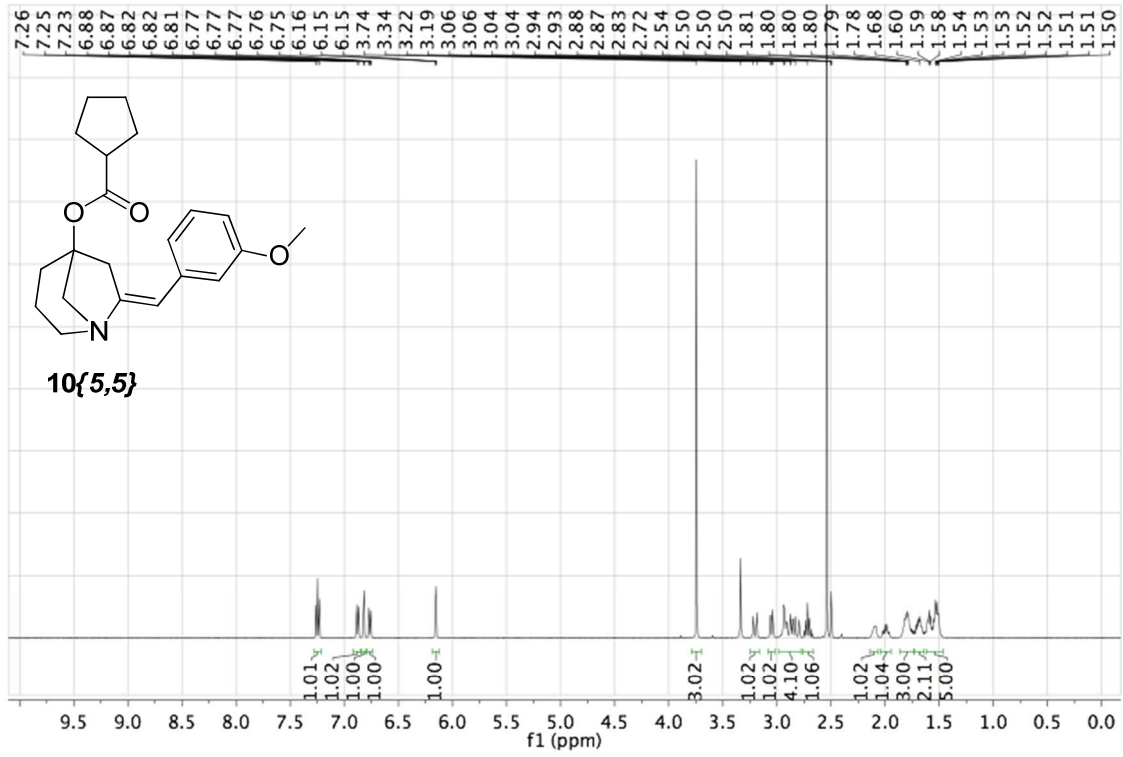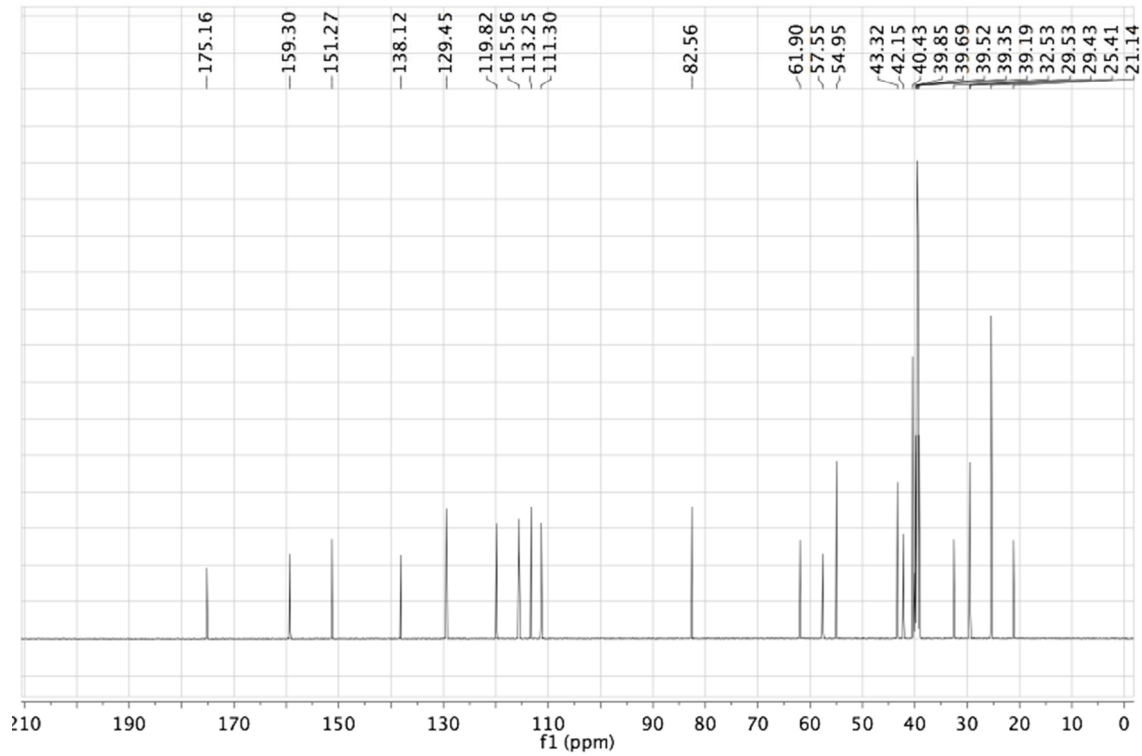

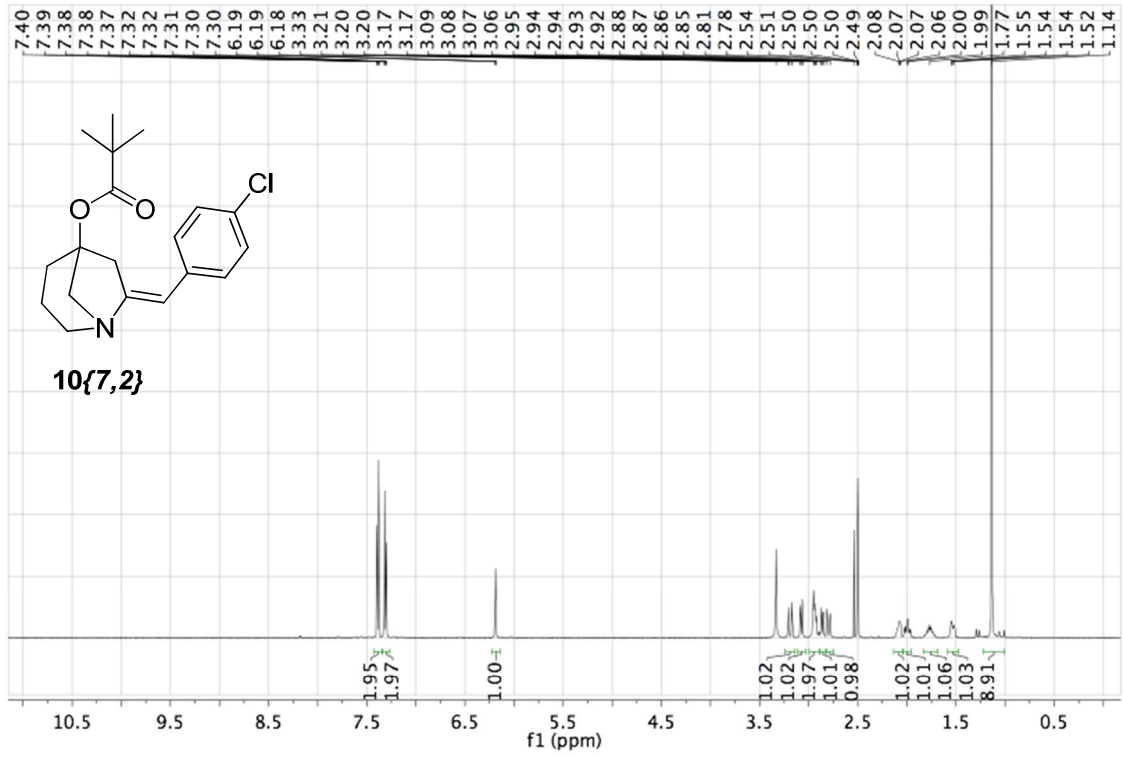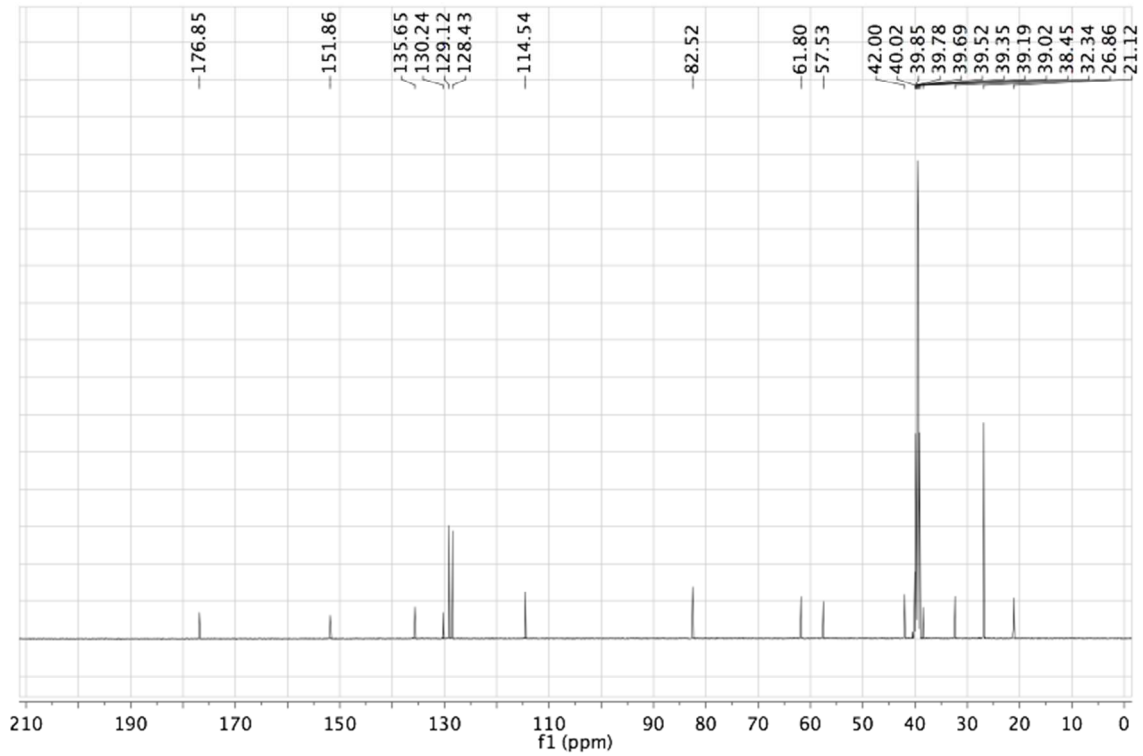

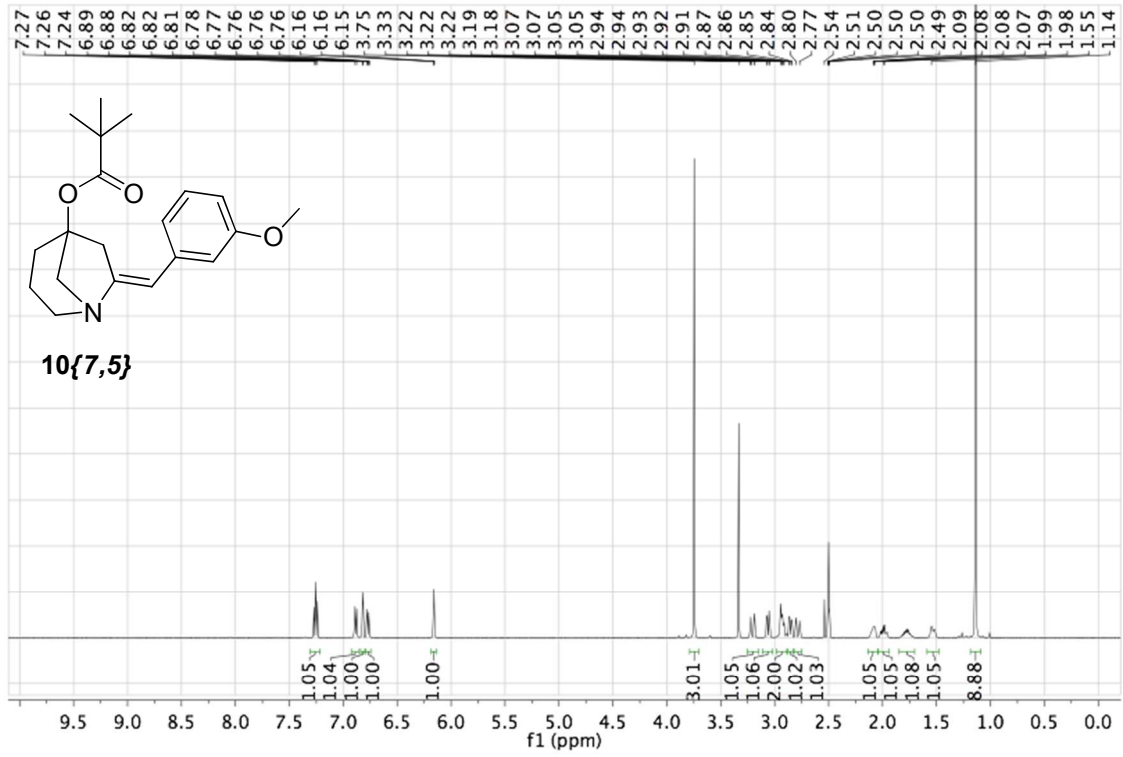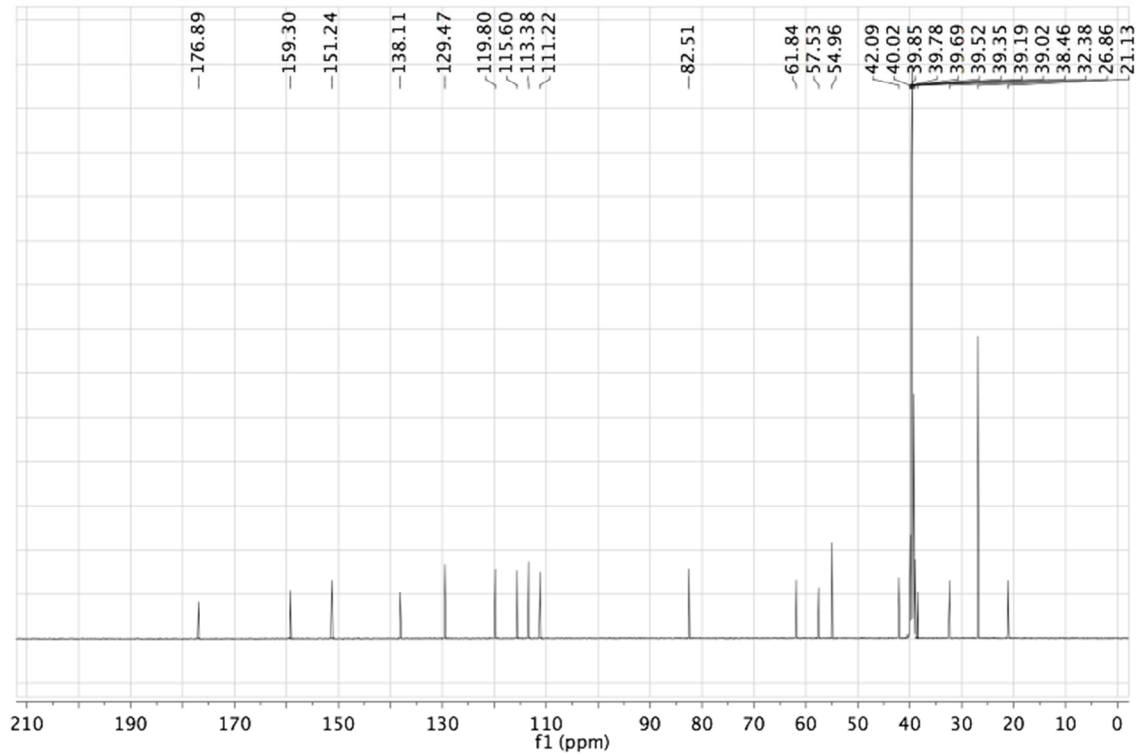

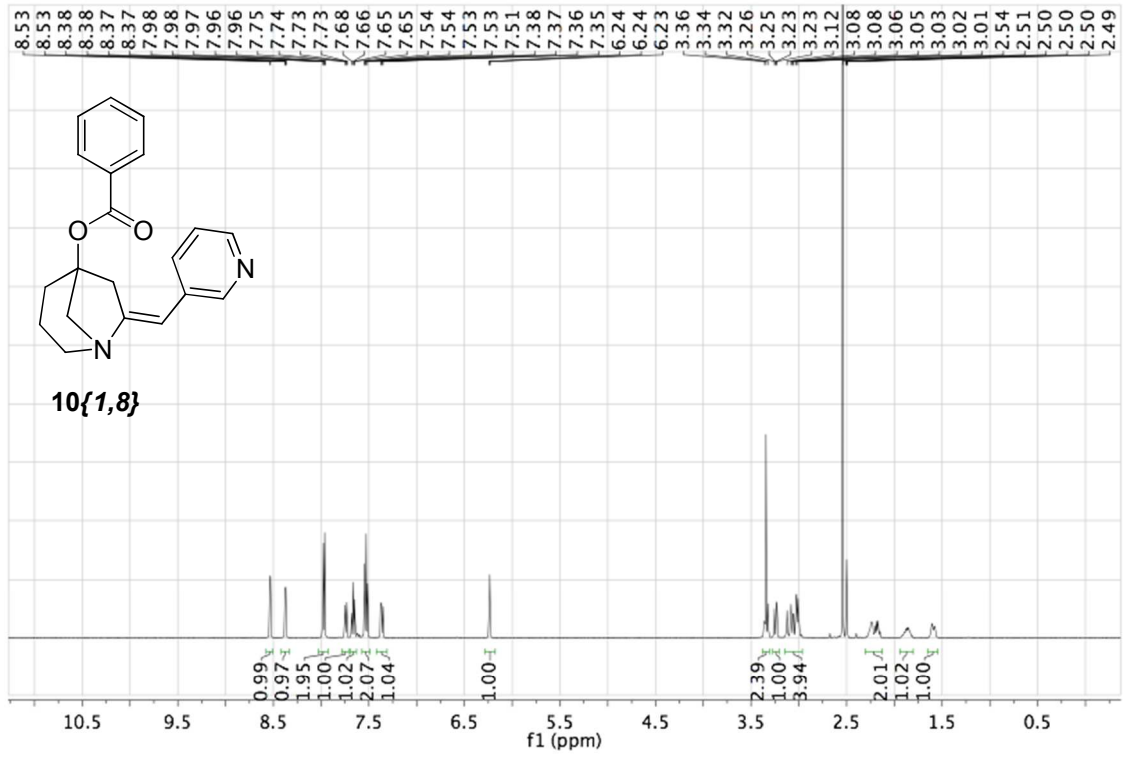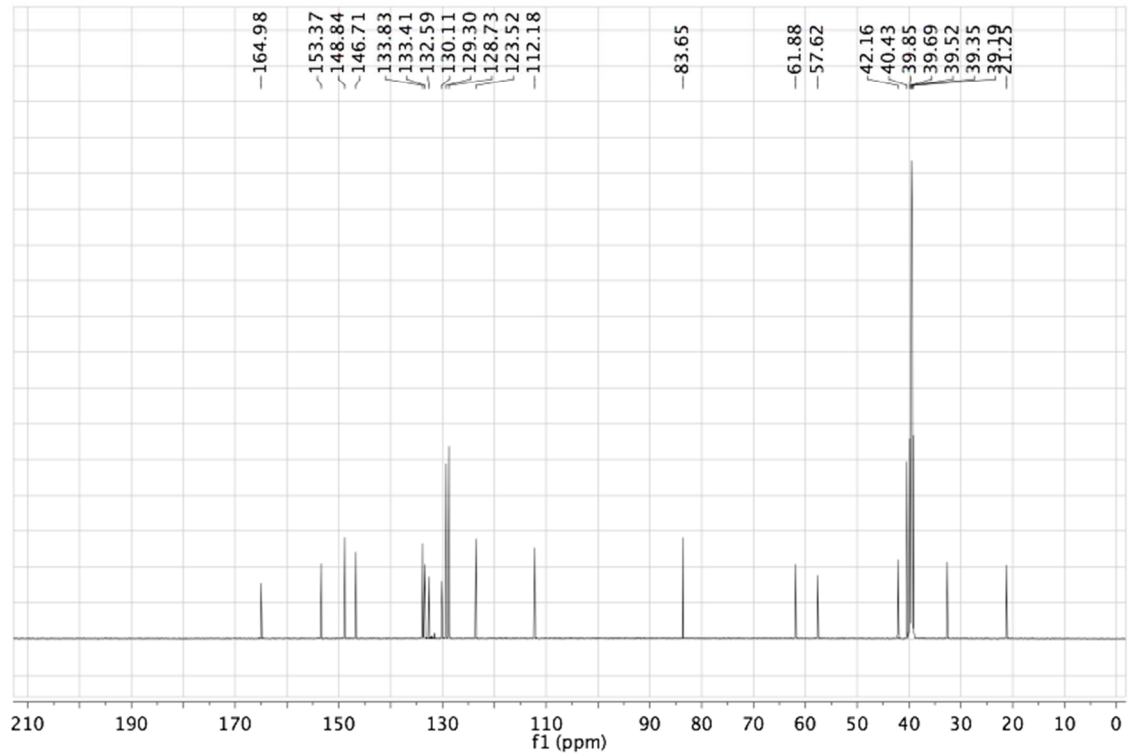

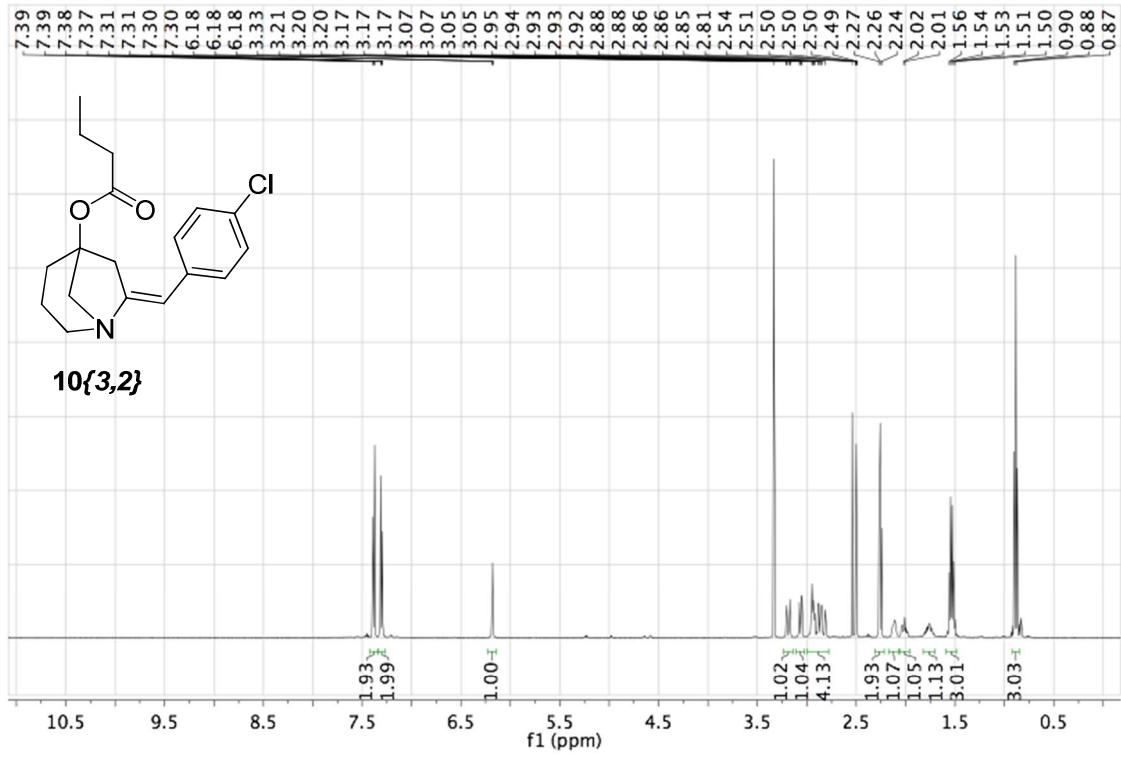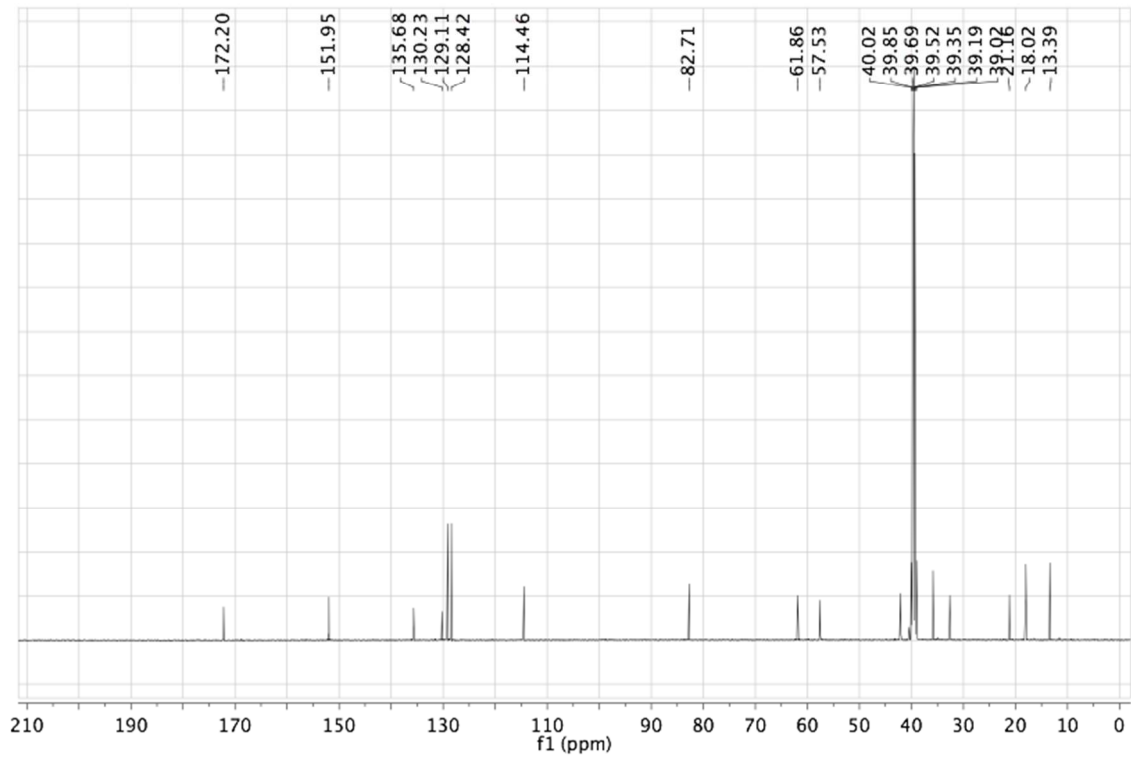



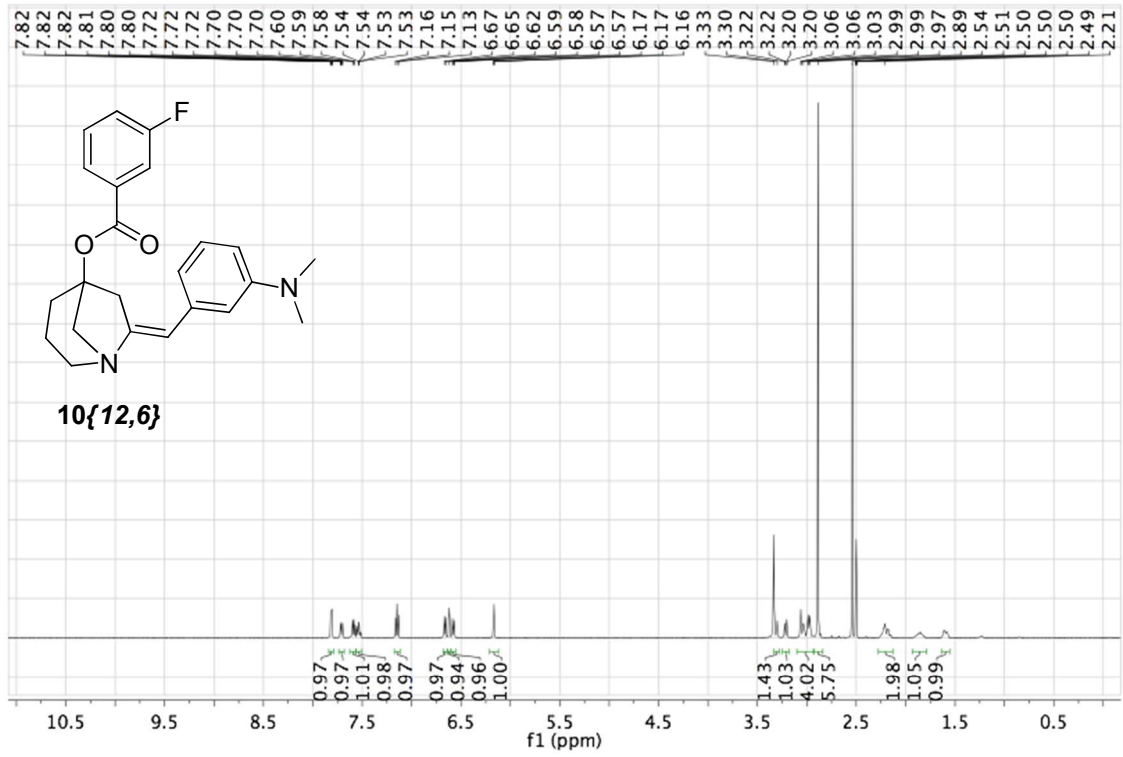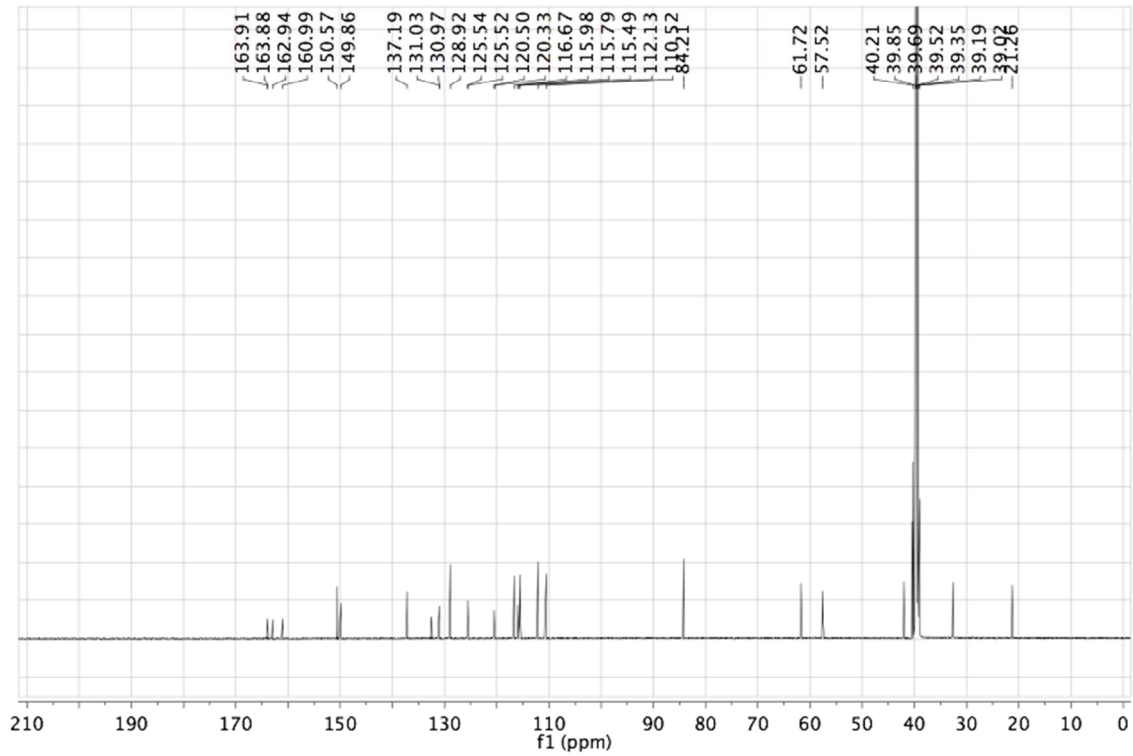

Supplement: NIHMS463036-supplement-2_si_002.pdf [file NIHMS463036-supplement-2_si_002.pdf]
